# Supplementary material
Source: PubMed Central journal article supplement (PMC3871932)

**Supplementary Figure 1. LEL Estimation From Concentration-Response For All 1078 ToxCast Chemicals.** For each ToxCast chemical, a LEL was estimated using methods described in Figure 2. At each concentration, each incidence was plotted, and once a significance threshold was achieved, the point was colored red.

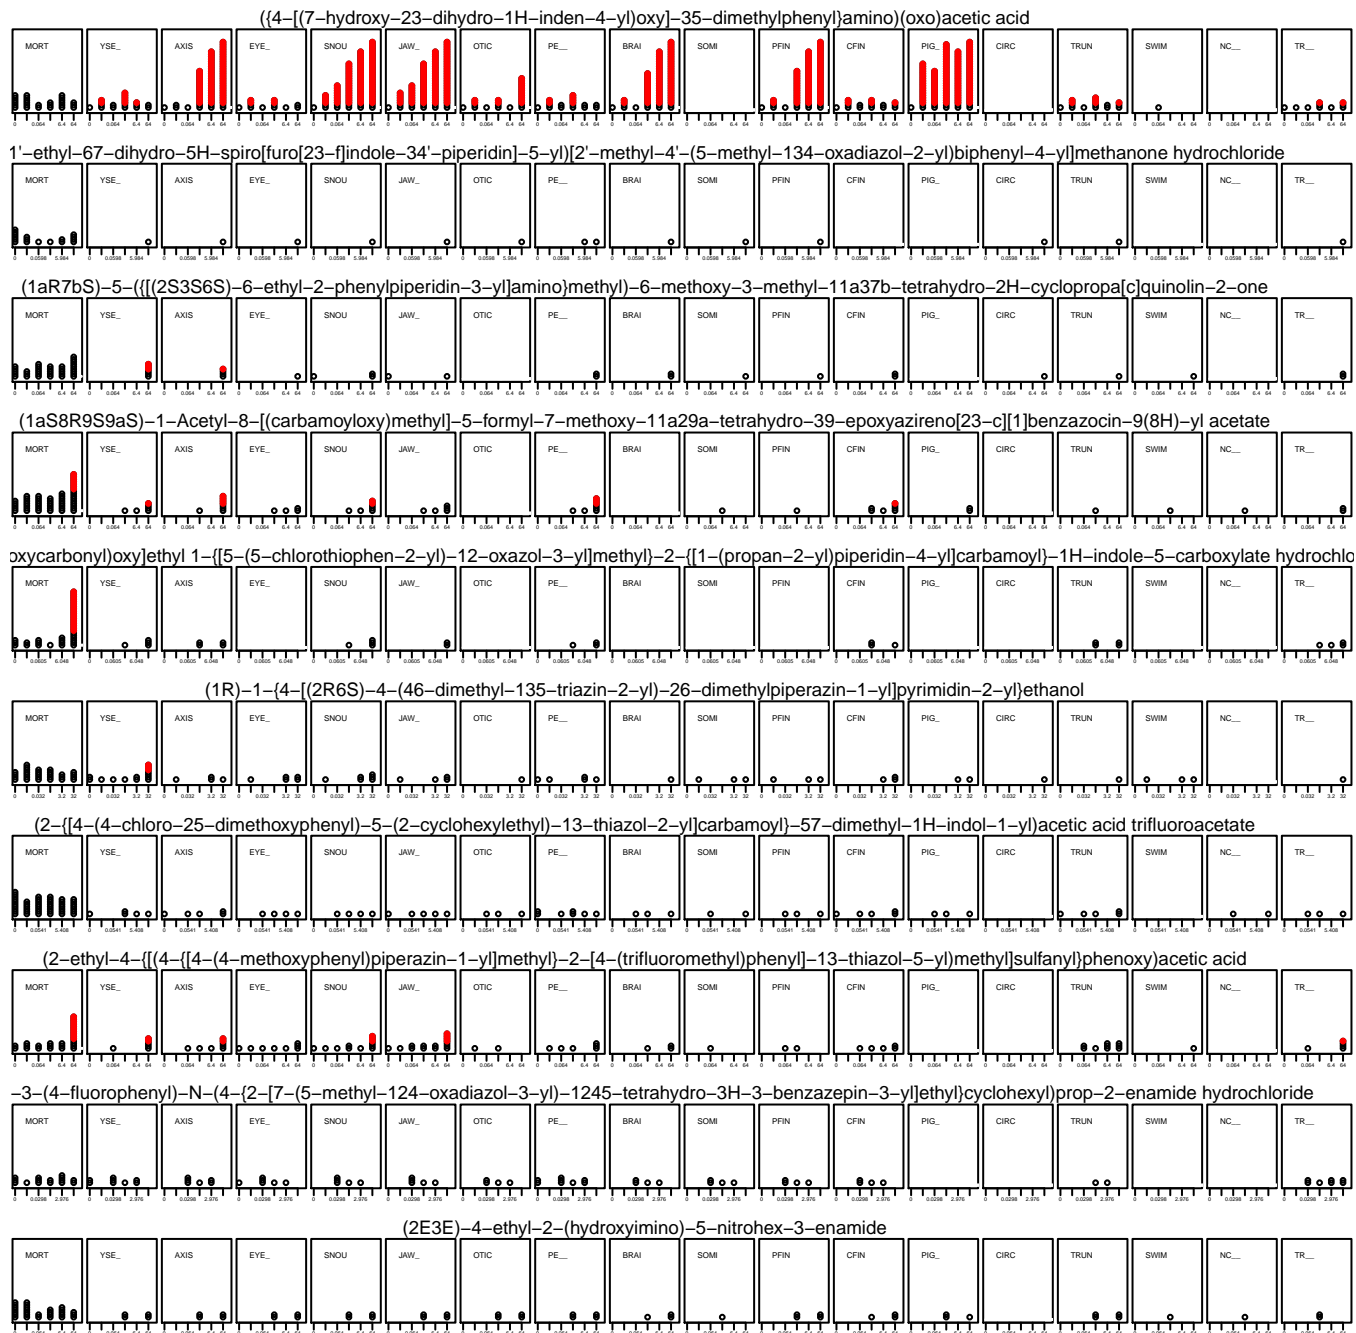

(2R)-2-[3-Chloro-4-(methylsulfonyl)phenyl]-3-cyclopentyl-N-(pyrazin-2-yl)propanamide

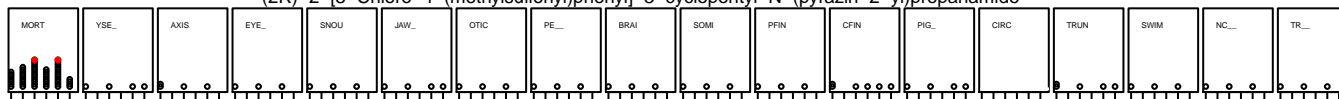

(2R)-2-[4-(((2-(13-benzodioxol-5-yloxy)pyridin-3-yl)carbonyl)amino)methyl]-3-fluorophenoxy]propanoic acid

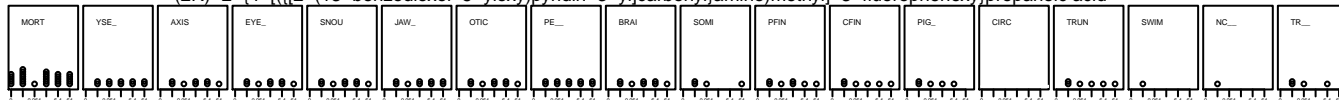

(2S)-44-difluoro-1-(N-[8-(pyrimidin-2-yl)-8-azabicyclo[3.2.1]oct-3-yl]glycyl)pyrrolidine-2-carbonitrile

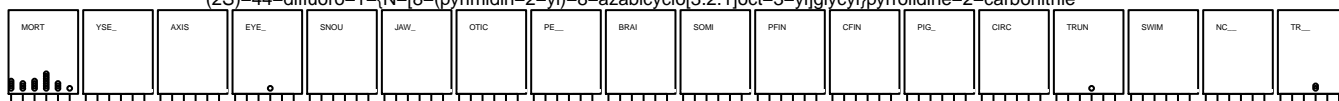

(2S3S)-3-methyl-2-(3-oxo-12-benzothiazol-2(3H)-yl)pentanoic acid

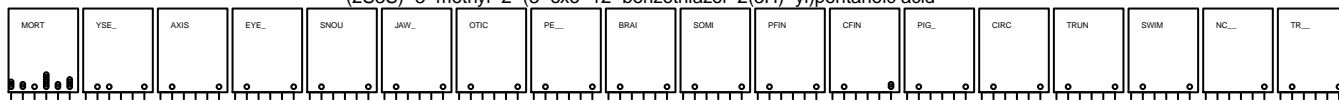

(2S3S)-N-[2-methoxy-5-(trifluoromethoxy)benzyl]-2-phenylpiperidin-3-amine

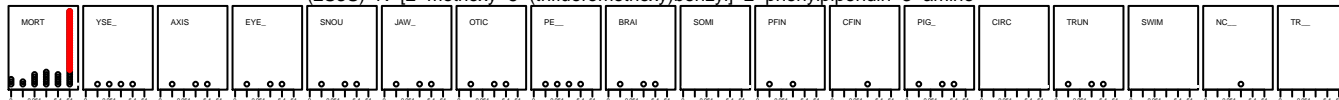

4R5R)-3-amino-5-[6-((5-chloro-2-((3-methyl-12-oxazol-5-yl)methoxy)benzyl)amino)-9H-purin-9-yl]-4-hydroxy-N-methyltetrahydrofuran-2-carboxamide

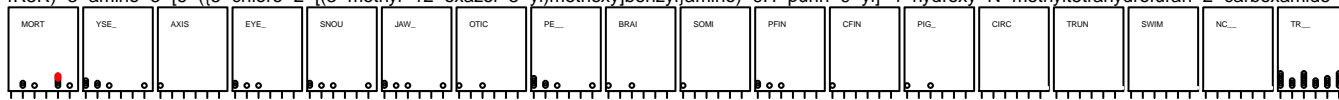

(2Z)-37-Dimethylocta-26-dien-1-ol

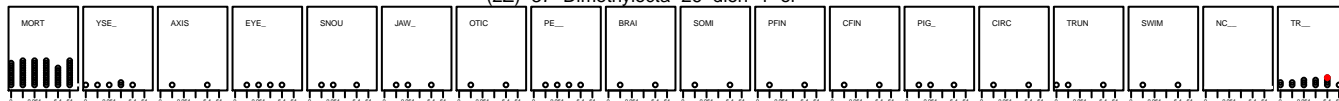

(3R4S)-3-[4-(4-fluorophenyl)-4-hydroxypiperidin-1-yl]-34-dihydro-2H-chromene-47-diol

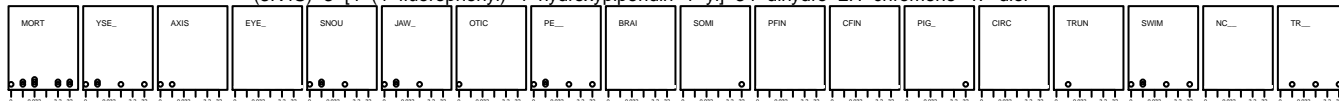

(3S)-3-(2-methylpyrimidin-5-yl)-9-(5678-tetrahydro-18-naphthyridin-2-yl)nonanoic acid

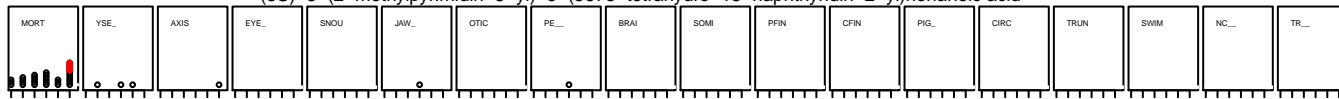

4-(((2R)-7-Methoxy-1234-tetrahydronaphthalen-2-yl)(propyl)amino)piperidin-1-yl)(piperidin-4-yl)methanone

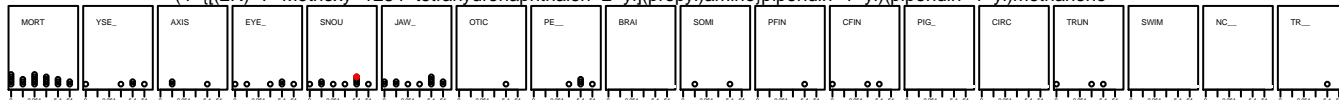

5-Butyl-9-(1-[(46-dimethylpyrimidin-5-yl)carbonyl]-4-methylpiperidin-4-yl)-3-(tetrahydro-2H-pyran-4-ylmethyl)-1-oxa-39-diazaspiro[5.5]undecan-2-one

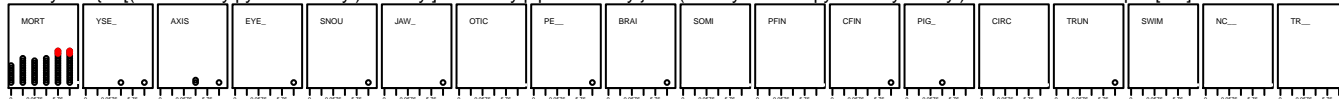

(5S8S)-5-(34-dichlorophenyl)-8-(methylamino)-5678-tetrahydronaphthalene-2-sulfonamide

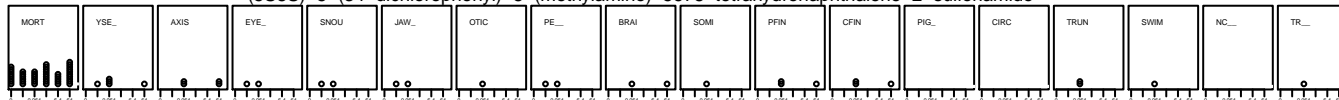

S)-6-[2-(4-aminophenyl)ethyl]-3-([2-tert-butyl-4-(hydroxymethyl)-5-methylphenyl]sulfonyl)-4-hydroxy-6-(propan-2-yl)-56-dihydro-2H-pyran-2-one

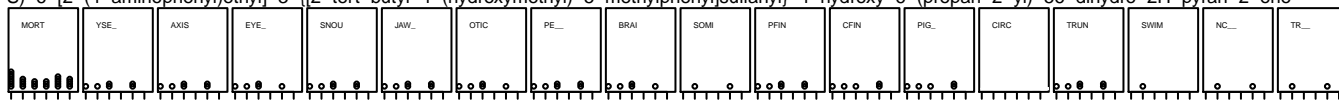

(E)-Anethole

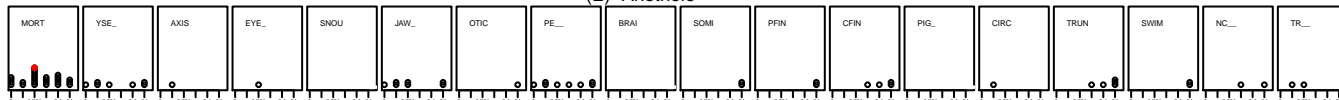

2-([2-(4-tert-butyl-13-thiazol-2-yl)-1-benzofuran-5-yl]oxy)methylphenyl]acetic acid

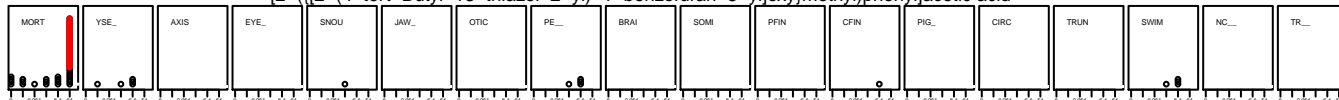

{4-[2-((2-hydroxy-2-[2-(trifluoromethyl)-13-thiazol-4-yl]ethyl)amino)propyl]phenoxy}acetic acid

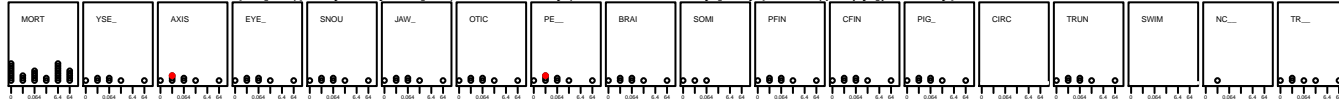

{4-[3-(aminomethyl)phenyl]piperidin-1-yl}[5-[(2-fluorophenyl)ethynyl]furan-2-yl]methanone

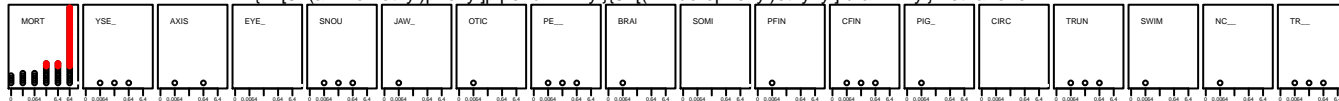

{4-[5-(aminomethyl)-2-fluorophenyl]piperidin-1-yl}[4-bromo-3-methyl-5-propoxythiophen-2-yl]methanone hydrochloride

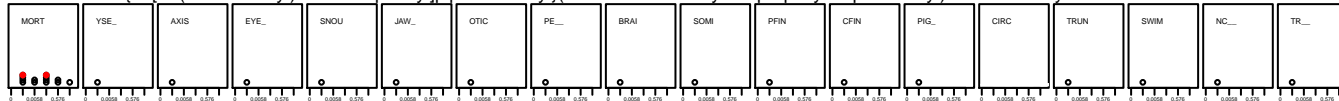

1-(2-carboxyphenyl)-7-chloro-6-[(2-chloro-46-difluorophenyl)amino]-4-oxo-14-dihydroquinoline-3-carboxylic acid

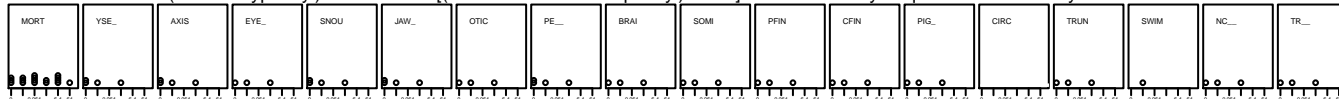

1-(Hydroxymethyl)-55-dimethylhydantoin

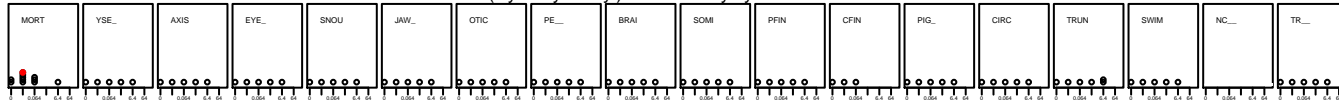

1-((2Z)-3-(2-chloro-3'-methoxybiphenyl-4-yl)prop-2-en-1-yl)azepane hydrochloride (1:1)

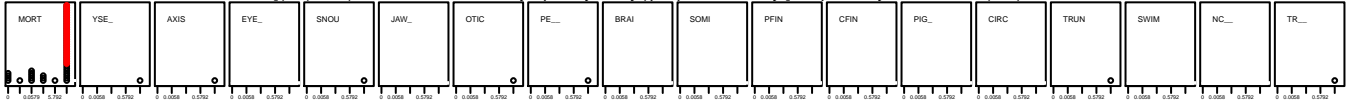

(3S)-4-(((35-bis(trifluoromethyl)phenyl)carbonyl)(methyl)amino)-3-(34-dichlorophenyl)butyl)-4-cyclohexyl-1-azoniabicyclo[2.2.2]octane methanesulfonate

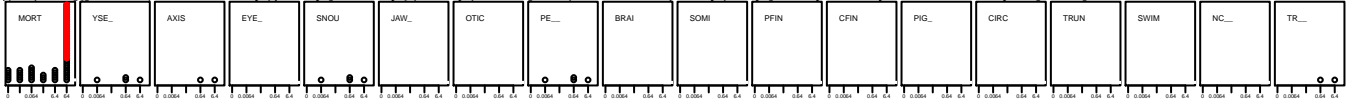

1-((3S)-6-(benzyloxy)-2,3-dihydro-1-benzofuran-3-yl)-1-hydroxyurea

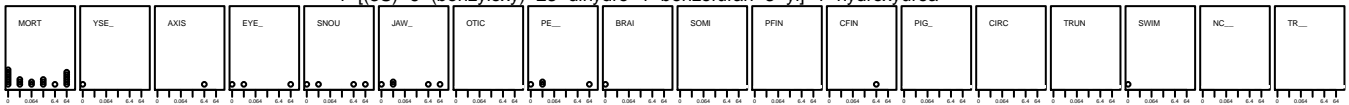

1-((3S4R)-3-(biphenyl-4-ylmethyl)-4-hydroxy-3,4-dihydro-2H-chromen-7-yl)cyclopentanecarboxylic acid

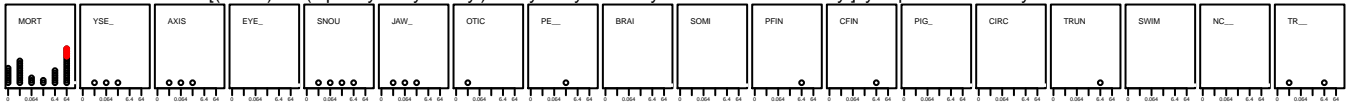

1-[2-(((2-chloro-4,5-difluorophenyl)carbonyl)carbamoyl)amino]-4-fluorophenyl]piperidine-4-carboxylic acid

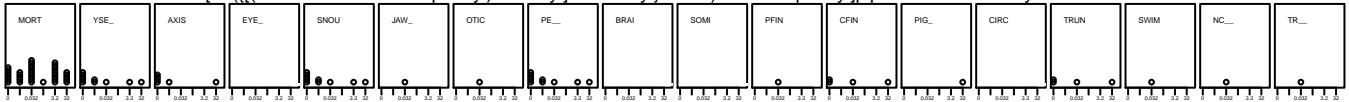

1-[2-(34-dichlorophenoxy)-5-fluorophenyl]-N-methylmethanamine

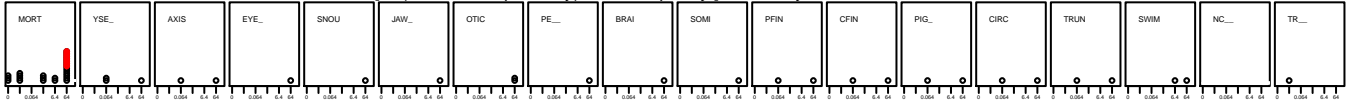

1-[3-(Triethoxysilyl)propyl]urea

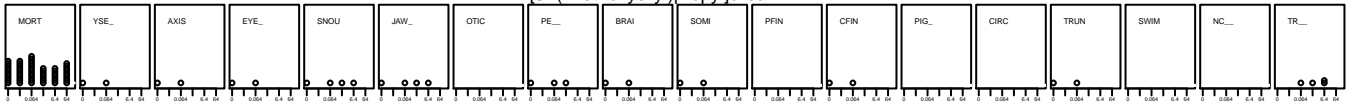

1-[4-(22-Diphenylethenyl)piperidin-1-yl]-9-(pyridin-3-yl)nonan-1-one

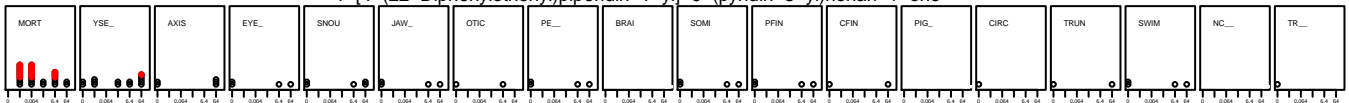

1-[[cis-1-(3-ethoxyphenyl)-4-methylcyclohexyl]-4-phenyl]piperazine methanesulfonate (1:1)

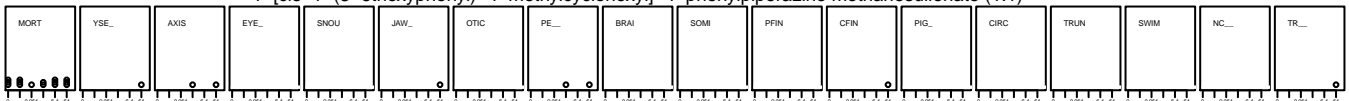

1-((1S4R)-4-[3-(4-fluorophenoxy)phenoxy]cyclopent-2-en-1-yl)-1-hydroxyurea

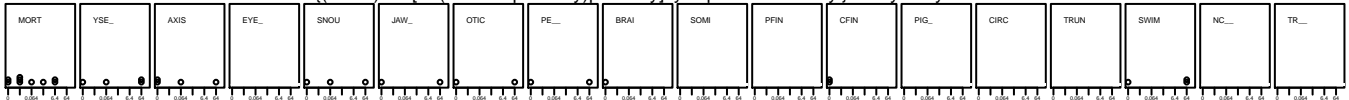

(2-[(5-chloropyridin-2-yl)amino]-2-oxoethyl)-5-(2-methoxyethoxy)-N-[1-(propan-2-yl)piperidin-4-yl]-1H-pyrrolo[2,3-c]pyridine-2-carboxamide acetate

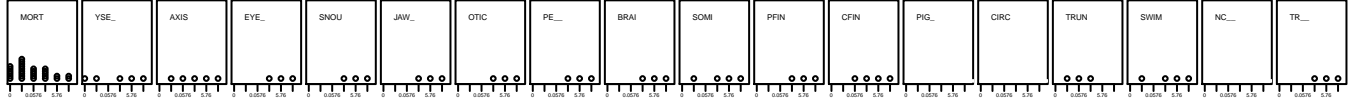

1-Benzyl-1-[(3-(4-chlorophenyl)-5-methyl-1-benzofuran-2-yl)methyl]-3-(246-trifluorophenyl)urea

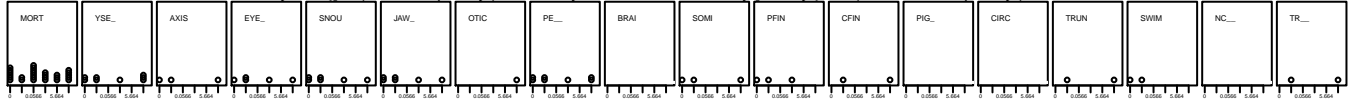

1-Benzylquinolinium chloride

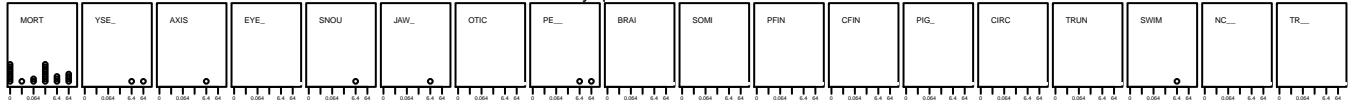

1-Chloro-4-nitrobenzene

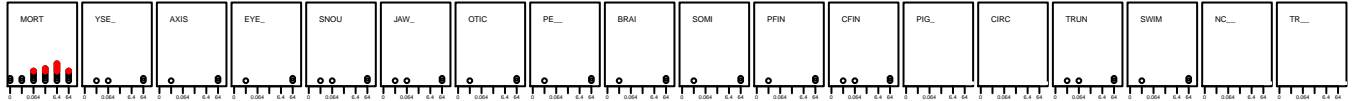

1-Decanol

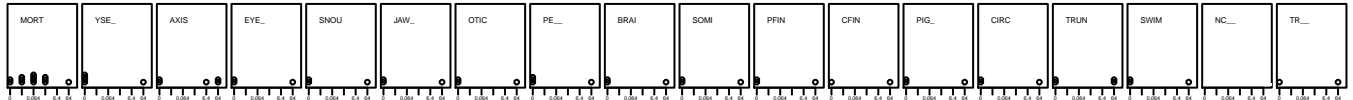

1-Dodecanol

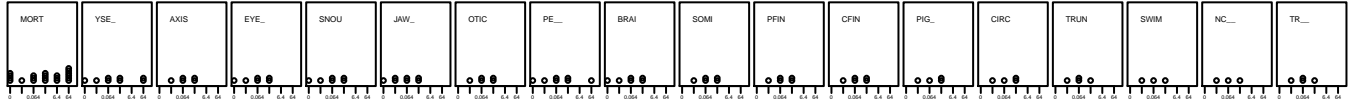

1-Dodecyl-2-pyrrolidinone

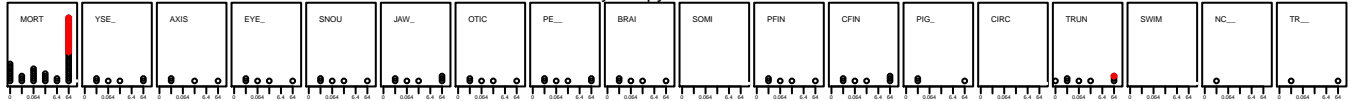

1-ethyl-5-(4-hydroxyphenyl)-3-methyl-6,7-dihydroprazolo[4,3-e][1,4]diazepin-8(1H)-one

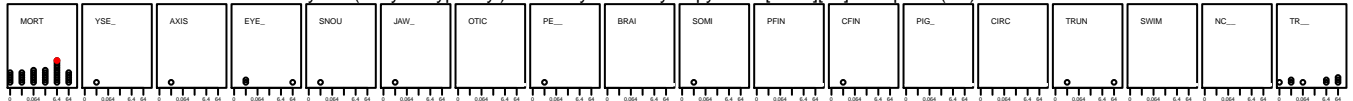

1-Hexadecanol

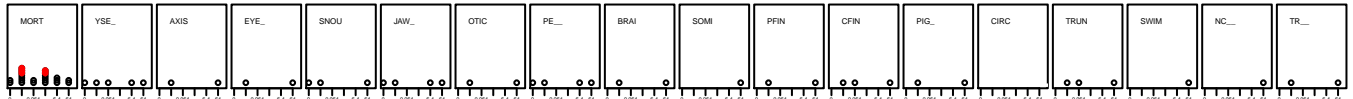

1-Hydroxypyrene

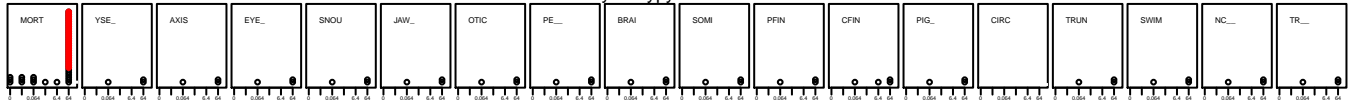



1122-Tetrahydroperfluoro-1-decanol

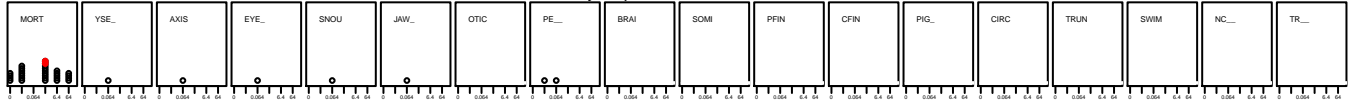

12-Benzenedicarboxaldehyde

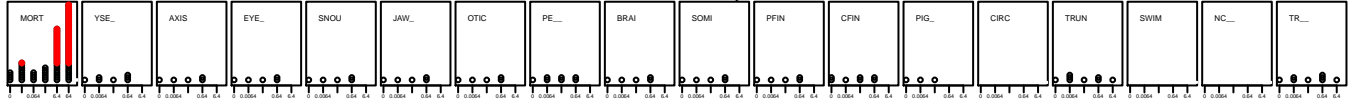

12-Benzenedicarboxylic acid di-C9-11-branched alkyl esters C10-rich

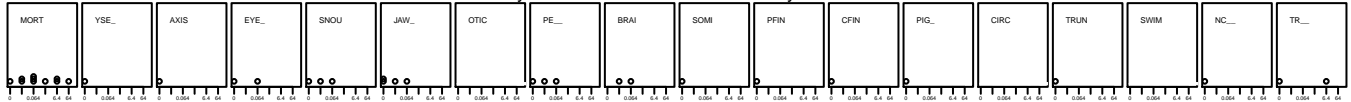

12-Benzisothiazolin-3-one

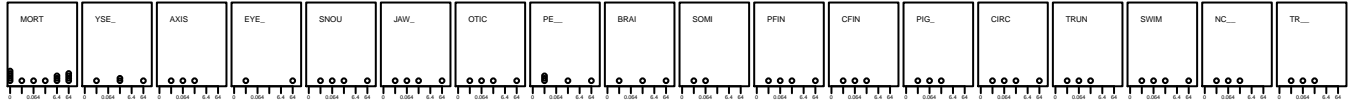

12-Dichlorobenzene

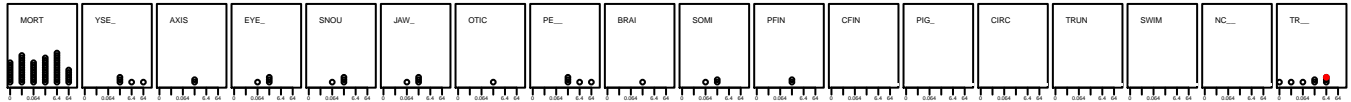

12-Dimethyl-3-nitrobenzene

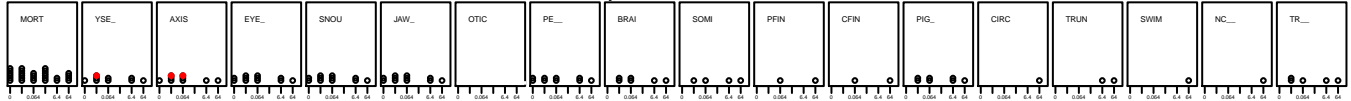

12-Dimethyl-4-nitrobenzene

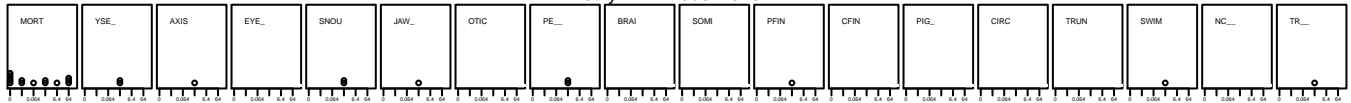

12-Dinitrobenzene

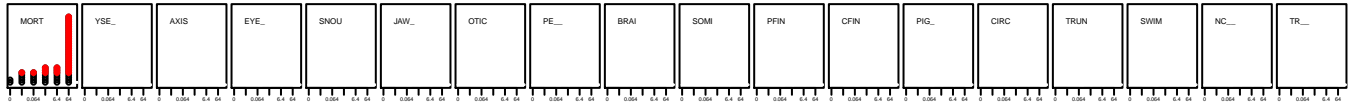

12-Diphenylhydrazine

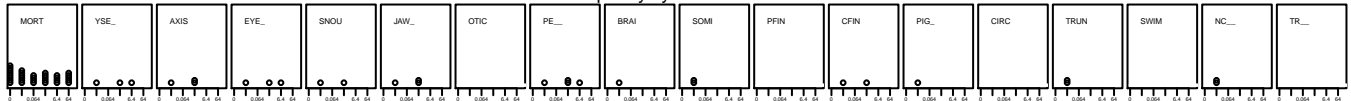

12-Phenylenediamine

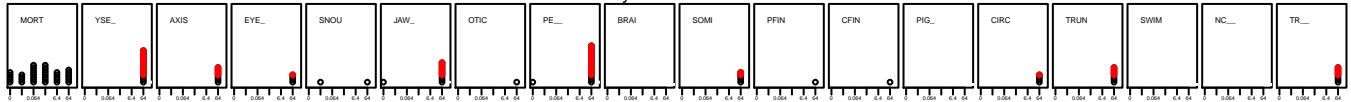

12-Propylene glycol

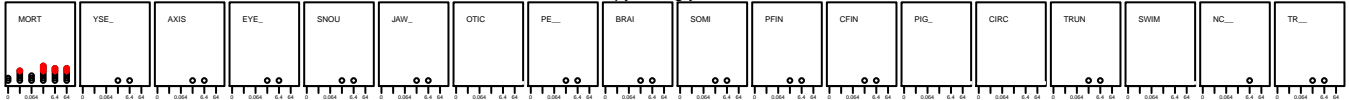

123-Benzotriazole

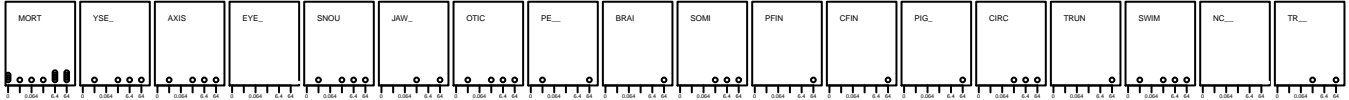

123-Trichlorobenzene

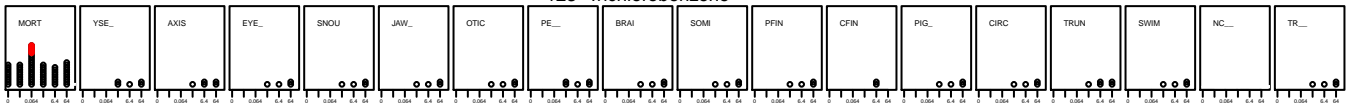

123-Trichloropropane

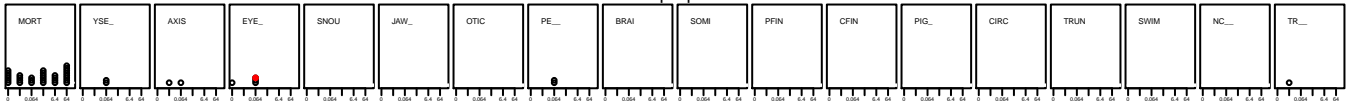

124-Trichlorobenzene

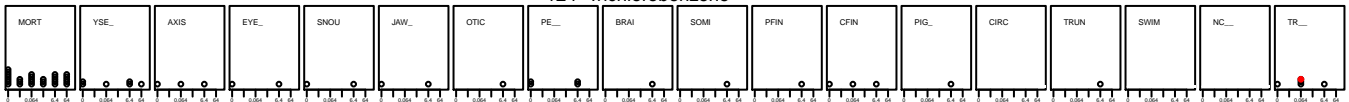

124-Trimethylbenzene

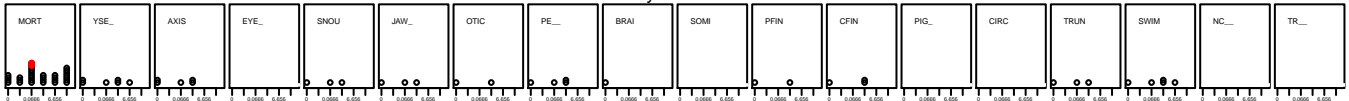

1245-Tetrachlorobenzene

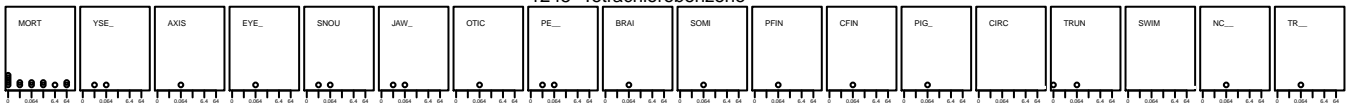

13-Benzenediamine

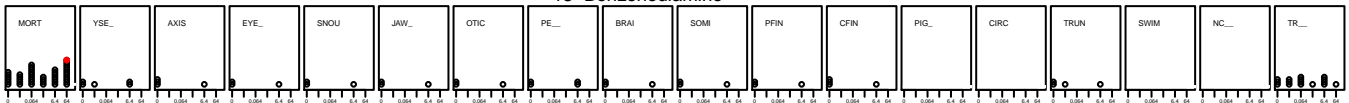

13-Benzenedicarboxylic acid

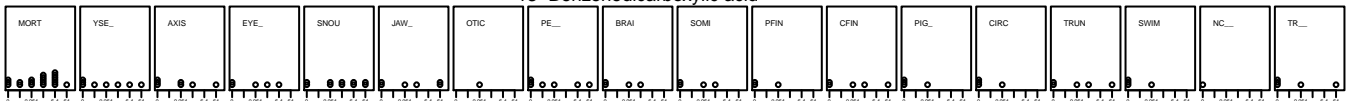

13-Butanediol

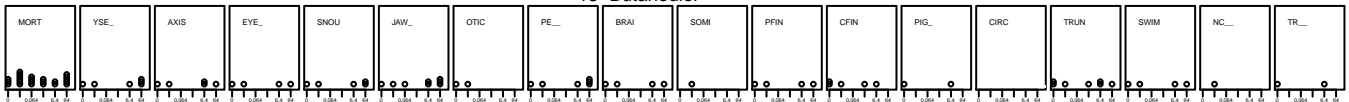



13-Dibromo-55-dimethylhydantoin

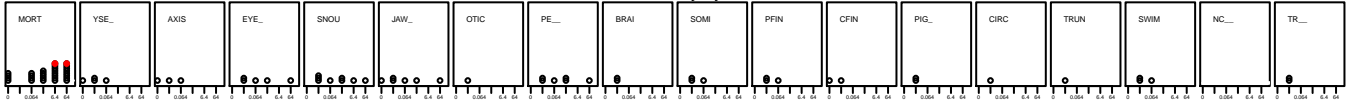

13-Dichloro-2-propanol

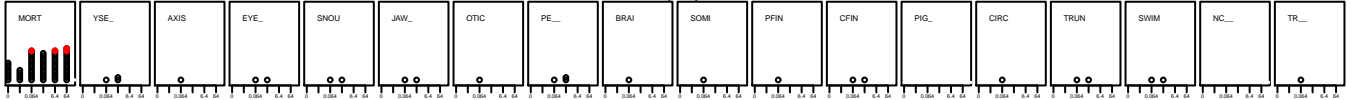

13-Dichloro-55-dimethylhydantoin

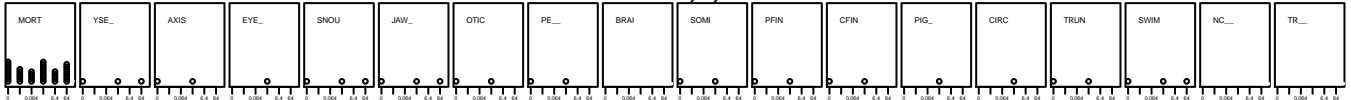

13-dichloro-67891012-hexahydroazepino[21-b]quinazoline hydrochloride (1:1)

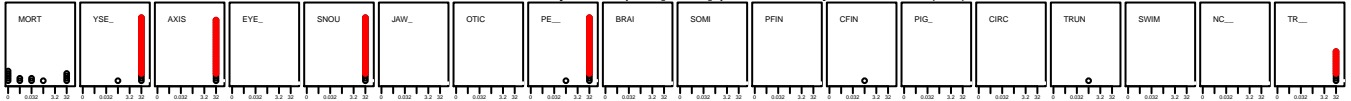

13-Dichlorobenzene

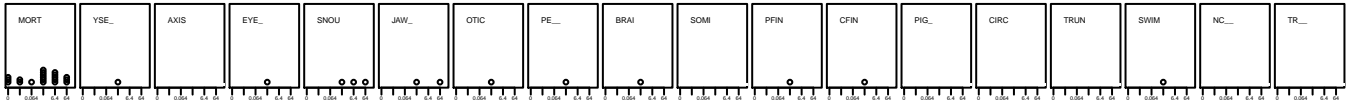

13-Diisopropylbenzene

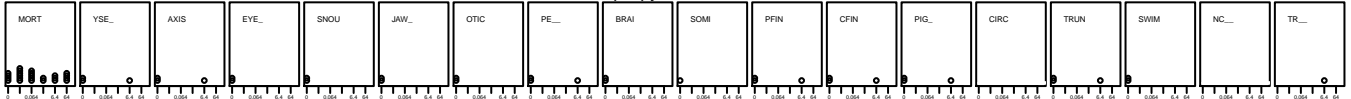

13-Dinitrobenzene

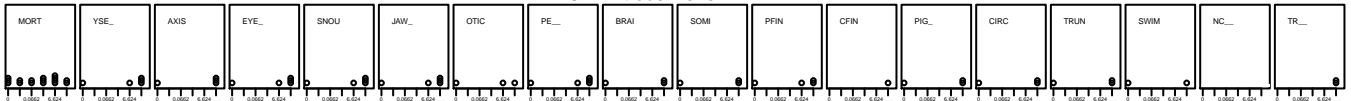

13-Diphenylguanidine

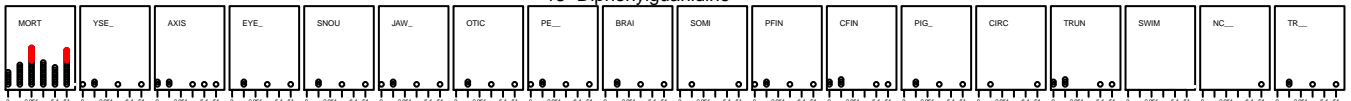

13-Propane sultone

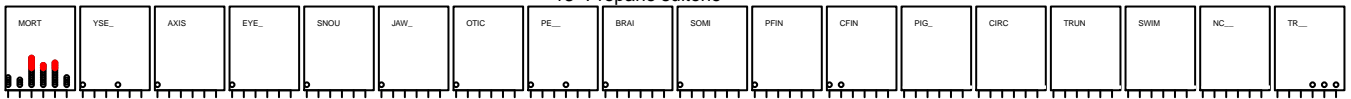

135-Trimethylbenzene

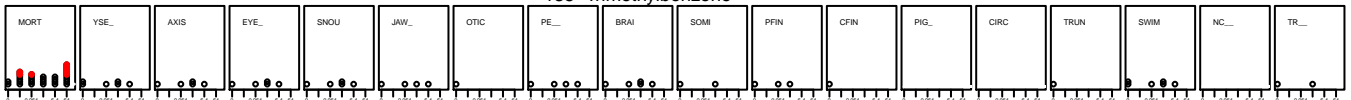

14-Dichlorobenzene

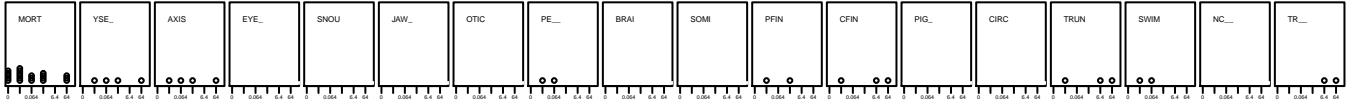

4-O-methyl-3-(((1R3S)-3-(propan-2-yl)-3-((3-(trifluoromethyl)-78-dihydro-16-naphthyridin-6(5H)-yl)carbonyl)cyclopentyl)ammonio)-D-erythro-pentitol 3-ca

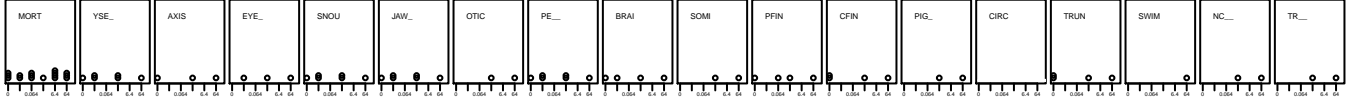

15-Naphthalenediamine

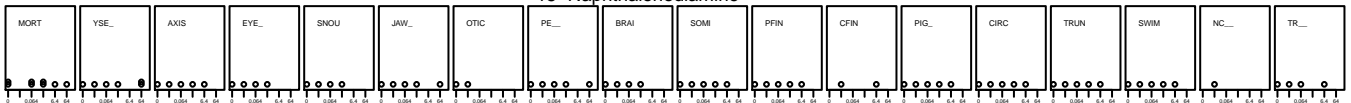

159-Cyclododecatriene

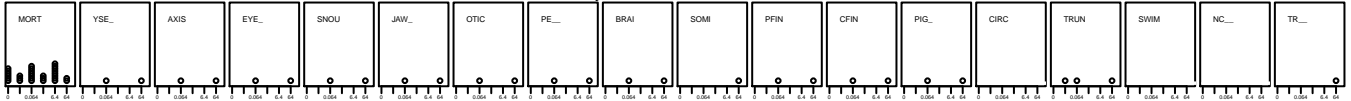

16-Diisocyanatohexane

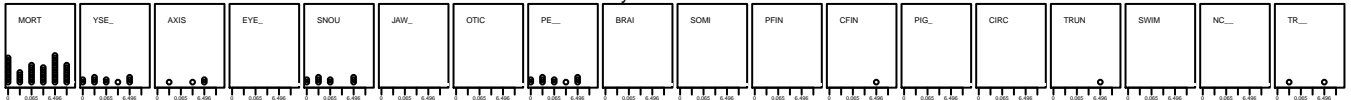

17-Methyltestosterone

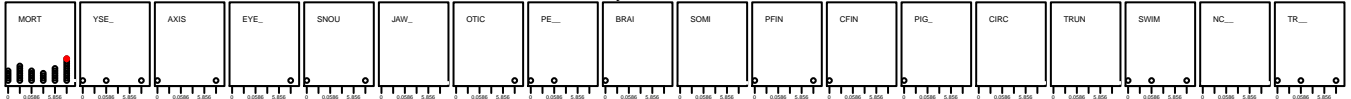

17alpha-Estradiol

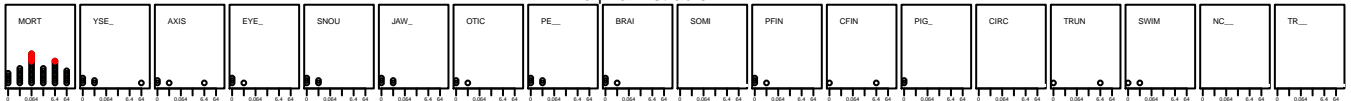

17alpha-Ethinylestradiol

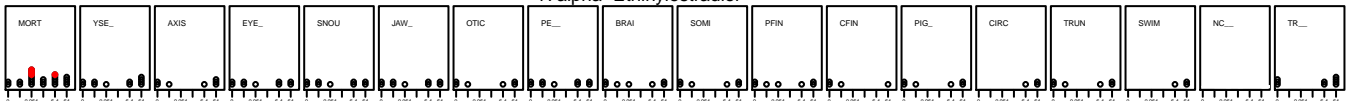

17alpha-Hydroxyprogesterone

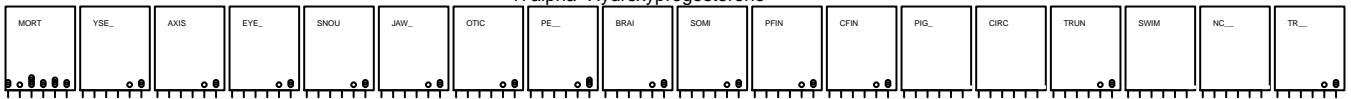

17beta-Estradiol

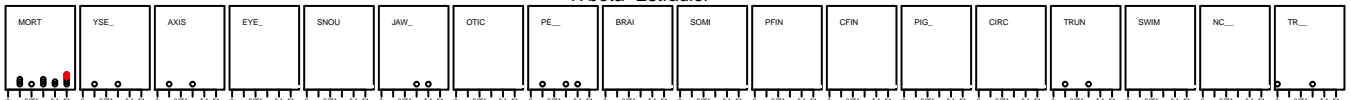

17beta-Trenbolone

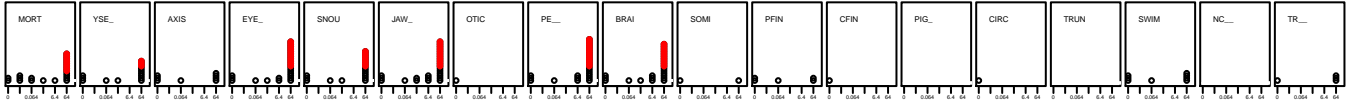

1H-124-Triazole

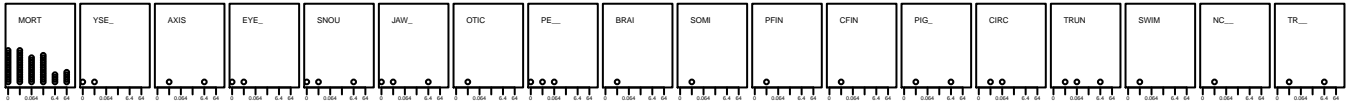

1H1H2H2H-Perfluorooctyl iodide

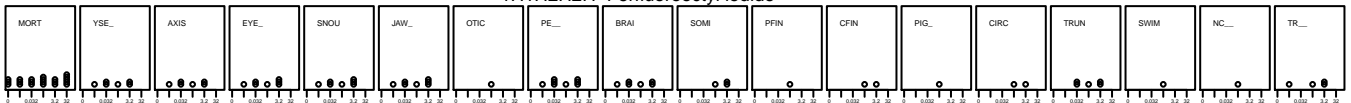

2-(1-benzofuran-4-yl)-N-methyl-N-[(5R7S8S)-7-(pyrrolidin-1-yl)-1-oxaspiro[4.5]dec-8-yl]acetamide

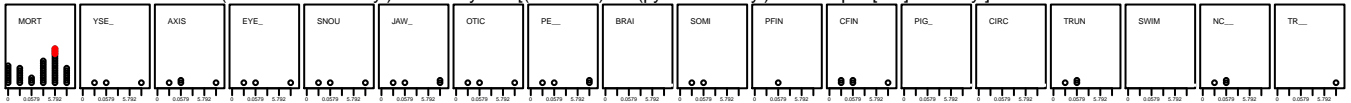

2-(2-{5-[5-(Azepan-1-ylmethyl)-2-thienyl]-124-oxadiazol-3-yl}ethyl)-1H-indole-13(2H)-dione (2E)-but-2-enedioate (1:1)

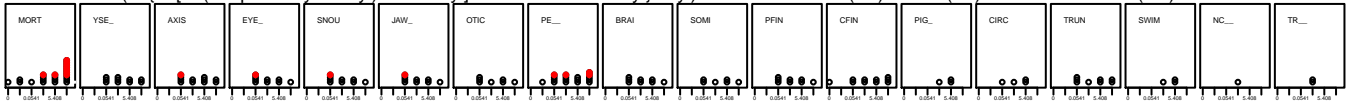

2-(2-Butoxyethoxy)ethanol

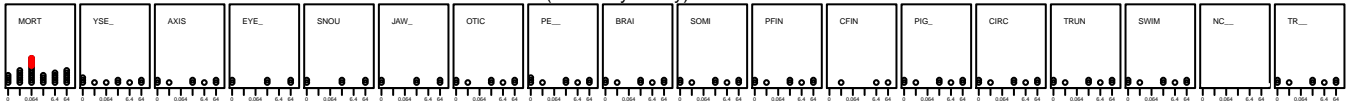

2-(2-Ethoxyethoxy)ethanol

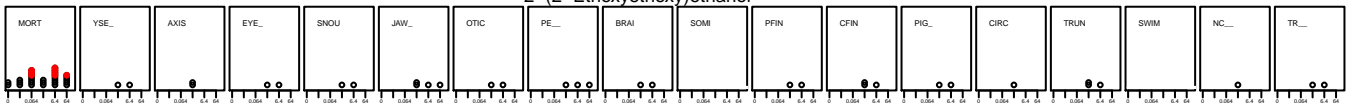

2-(4-fluorophenoxy)-N-[4-(2-hydroxypropan-2-yl)benzyl]pyridine-3-carboxamide

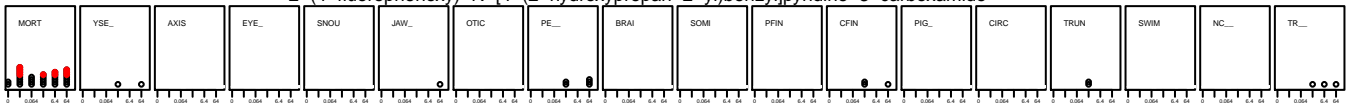

2-(Butan-2-yl)phenol

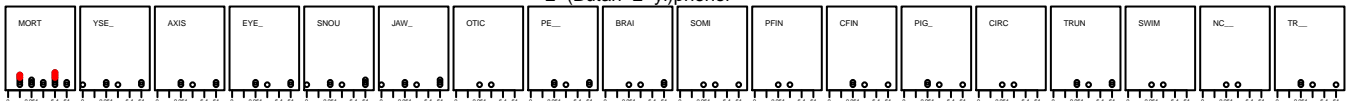

2-(Hexyloxy)ethanol

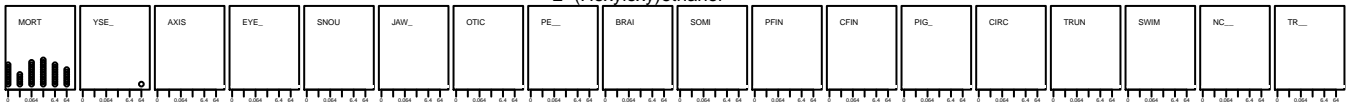

2-(Hydroxymethyl)-2-nitro-1,3-propanediol

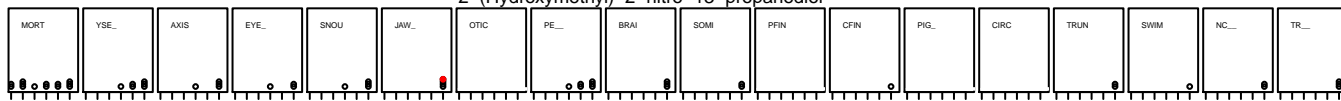

2-(Thiocyanomethylthio)benzothiazole

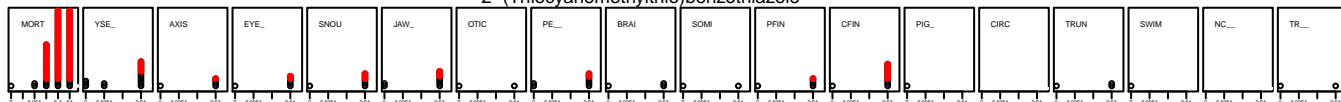

2-[2-(2-Ethoxyethoxy)ethoxy]ethanol

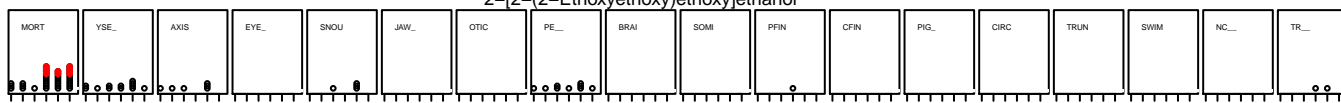

-Bis(trifluoromethyl)phenyl]-N-(4-(4-fluoro-2-methylphenyl)-6-[(2R3R)-3-hydroxy-2-(hydroxymethyl)pyrrolidin-1-yl]pyridin-3-yl)-N,2-dimethylpropanamide

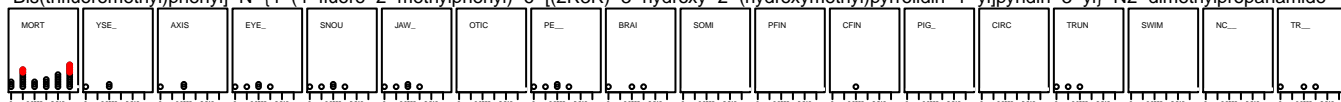

2-[4-(4-fluorophenyl)-5-(2-phenoxy-pyrimidin-4-yl)-1H-imidazol-1-yl]propane-1,3-diol

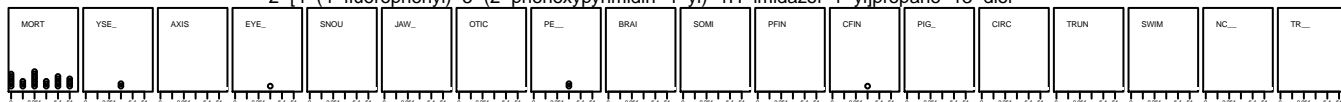

2-[[6-methoxy-11-dioxido-3-oxo-4-(propan-2-yl)-12-benzothiazol-2(3H)-yl]methoxy]-9-[2-(piperidin-1-yl)ethoxy]-4H-pyrido[1,2-a]pyrimidin-4-one

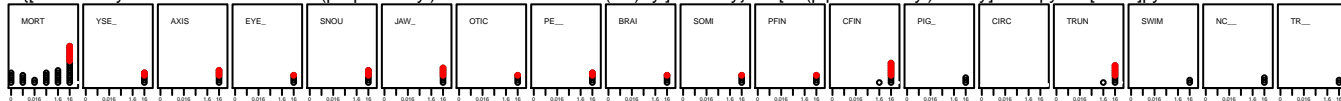

2-Amino-5-azotoluene

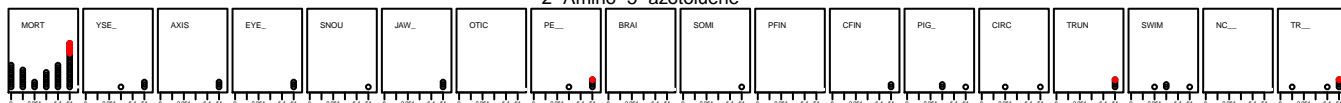

2-Aminoanthraquinone

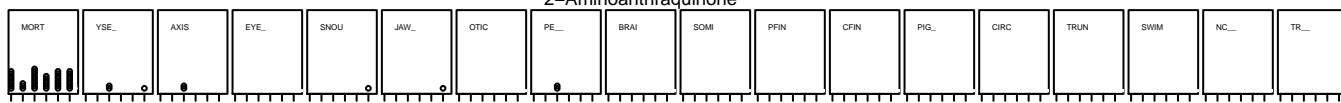

2-Anisidine

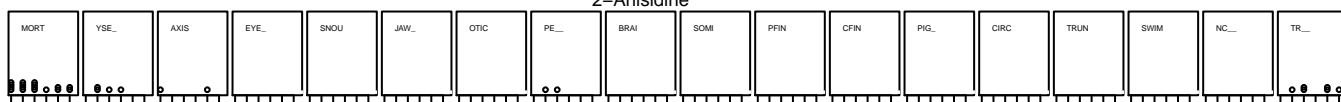

2-Benzylideneoctanal

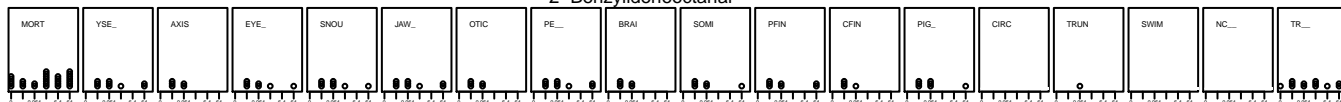

2-Bromo-4-fluoro-N-((E)-2-(thiophen-2-yl)ethenyl)sulfonylbenzamide

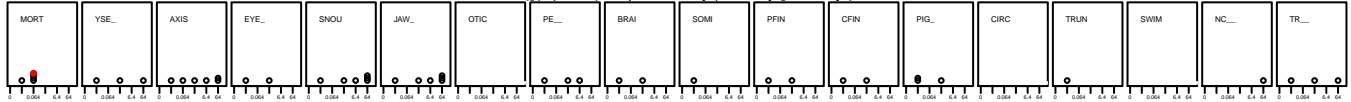

2-Butanone oxime

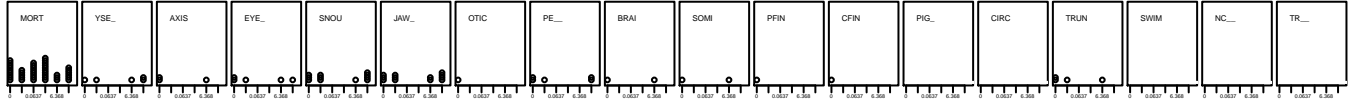

2-Butoxyethanol

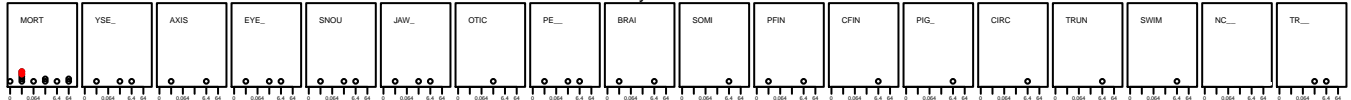

2-chloro-N-((S)-phenyl[(2S)-piperidin-2-yl]methyl)-3-(trifluoromethyl)benzamide

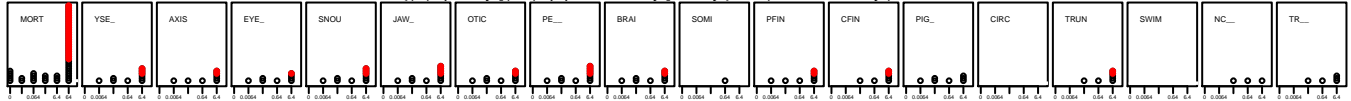

2-Chloroacetophenone

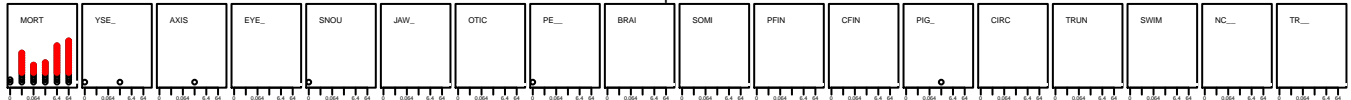

2-Chloroethanol

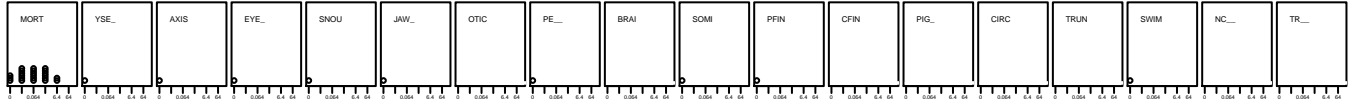

2-Chlorophenol

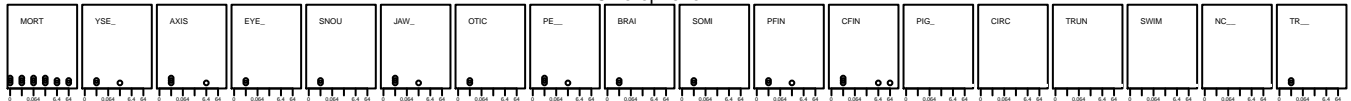

2-Chlorotoluene

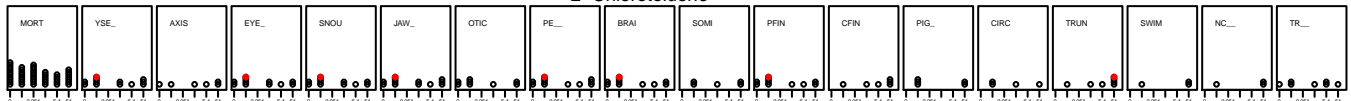

2-Ethoxyethanol

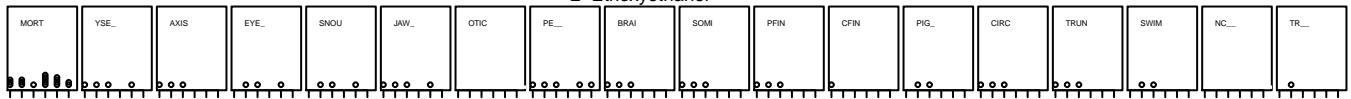

2-Ethoxyethyl acetate

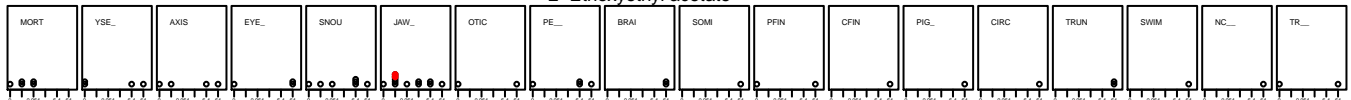

2-Ethyl-1-hexanol

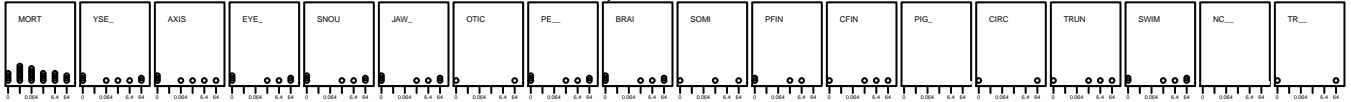

2-Ethylhexanoic acid

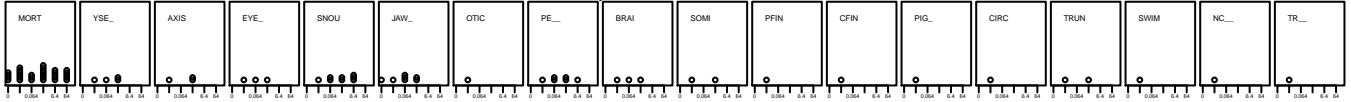

2-Hydroxybutanedioic acid

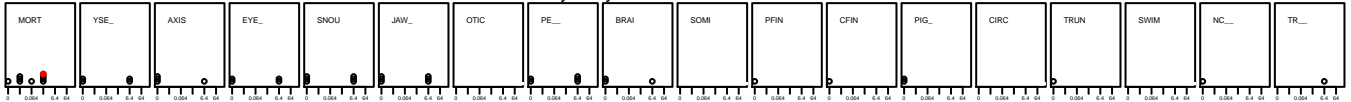

2-Mercaptobenzothiazole

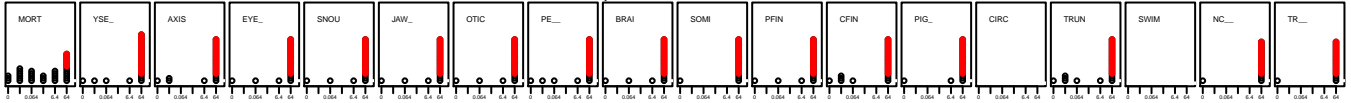

2-Methoxy-5-methylaniline

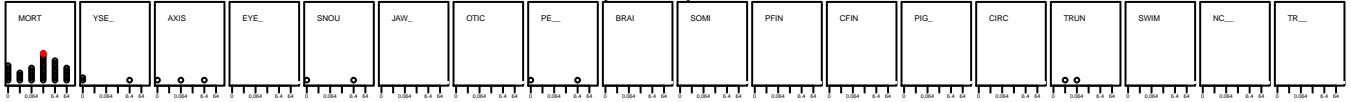

2-Methoxy-5-nitroaniline

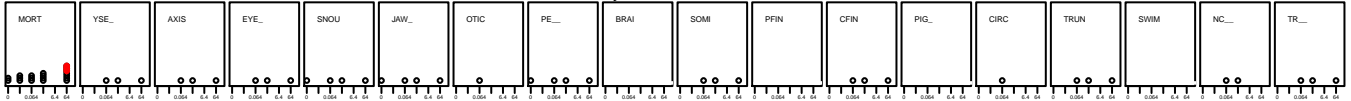

2-Methoxyethanol

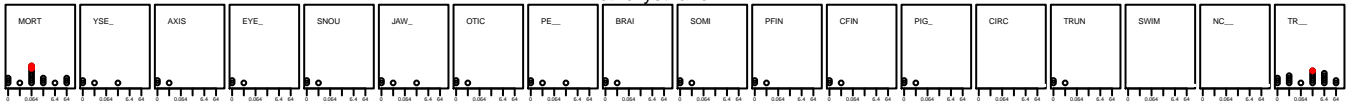

2-Methyl-24-pentenediol

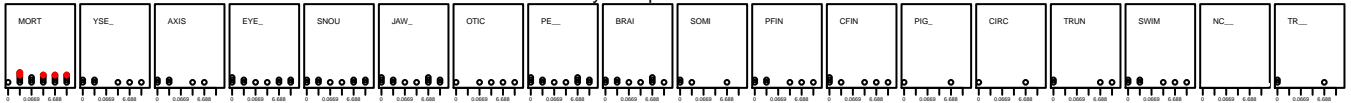

2-Methyl-4-chlorophenoxyacetic acid

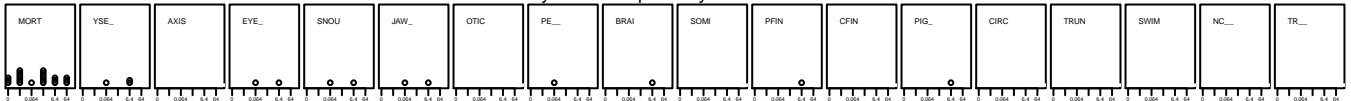

2-Methyl-46-dinitrophenol

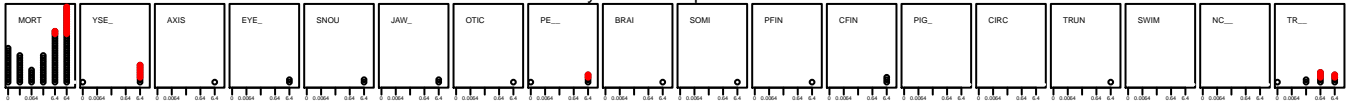

2-Methyl-5-nitroaniline

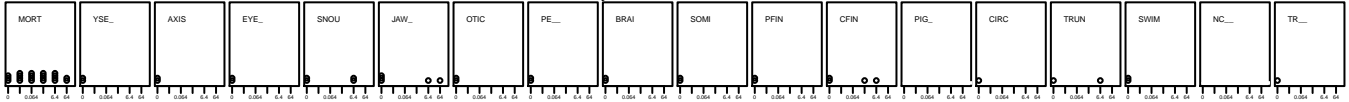

2-tert-Butyl-5-methylphenol

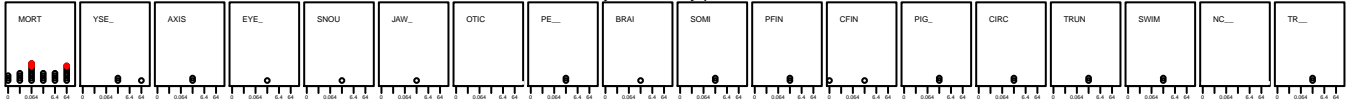

2-tert-Butylphenol

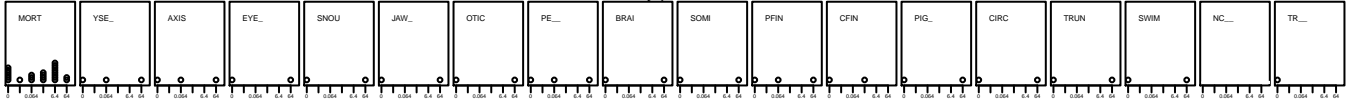

2'3'-Dideoxinosine

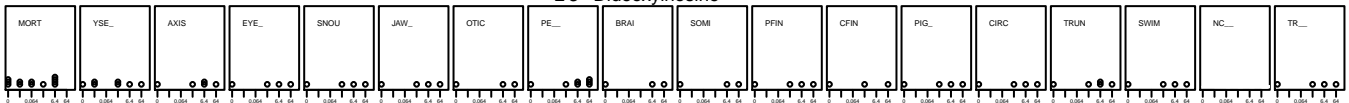

2'6-difluoro-5'-[3-(2-hydroxypropan-2-yl)imidazo[12-b][14]triazin-7-yl]biphenyl-2-carbonitrile

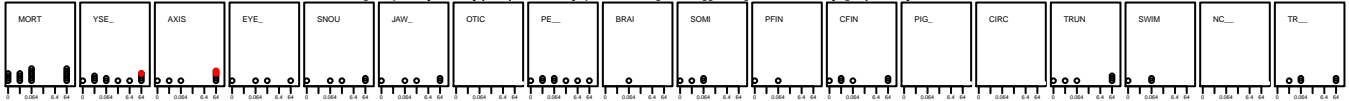

22-Bis(4-hydroxyphenyl)-111-trichloroethane

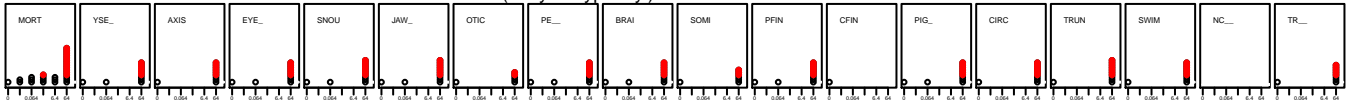

22-Bis(bromomethyl)-13-propanediol

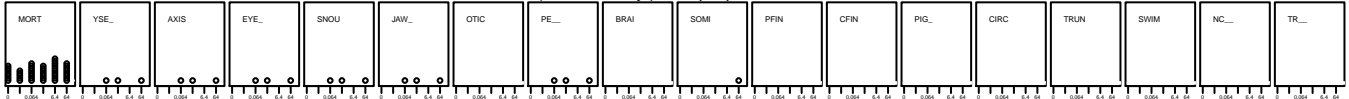

22-Dibromo-3-nitropropionamide

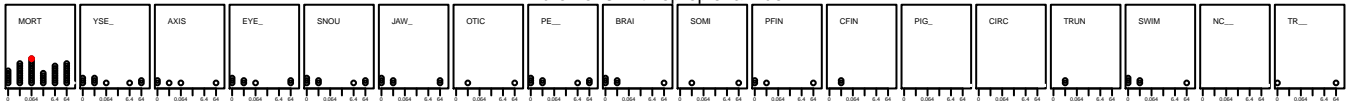

22'-(Ethane-1,2-diylbis(oxy))diethanamine

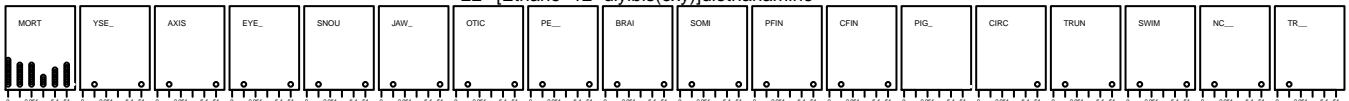

22'44'-Tetrahydroxybenzophenone

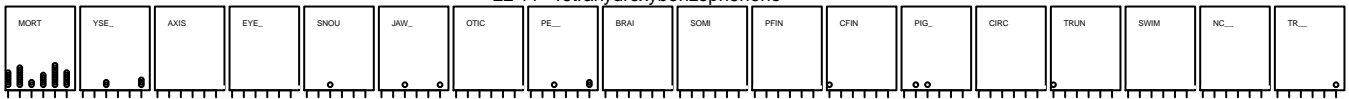

224-Trimethyl-13-pentane diisobutyrate

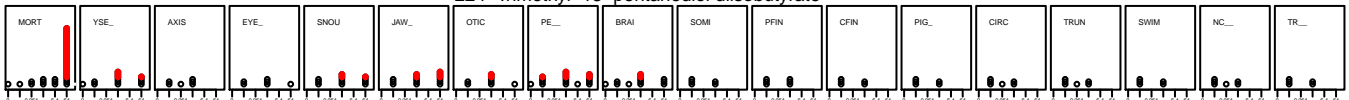



23-Diaminotoluene

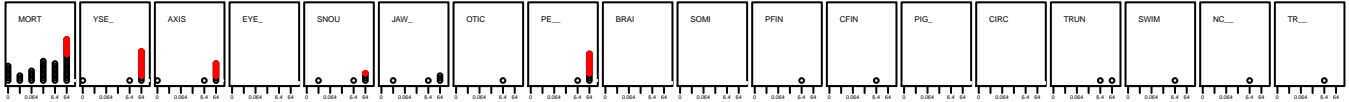

23-Dinitrotoluene

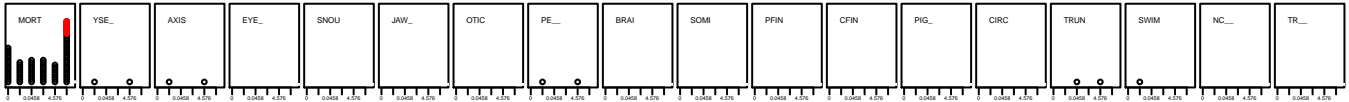

236-Trimethylphenol

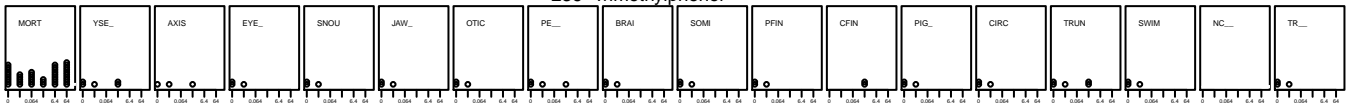

24-Bis(1-methyl-1-phenylethyl)phenol

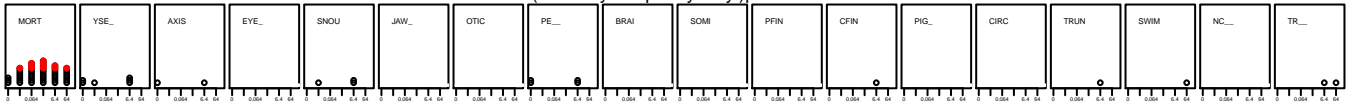

24-Bis(2-methylbutan-2-yl)phenol

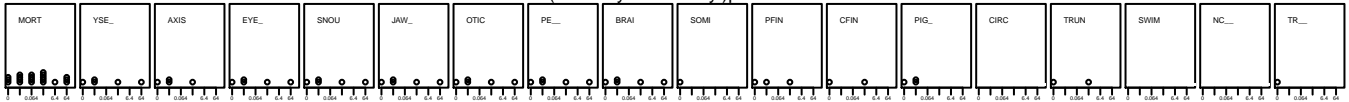

24-Di-tert-butylphenol

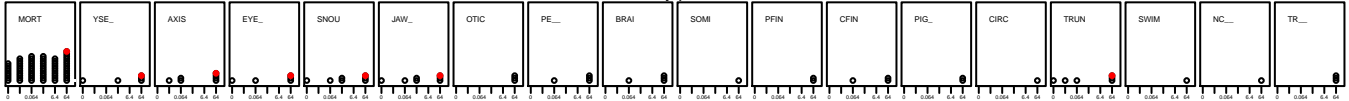

24-Diaminotoluene

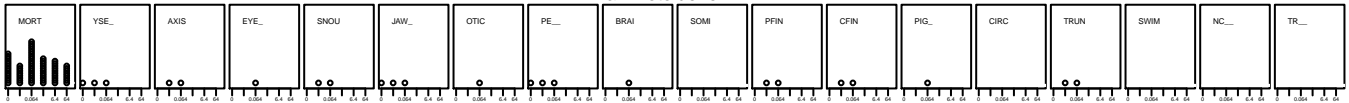

24-Dichlorophenol

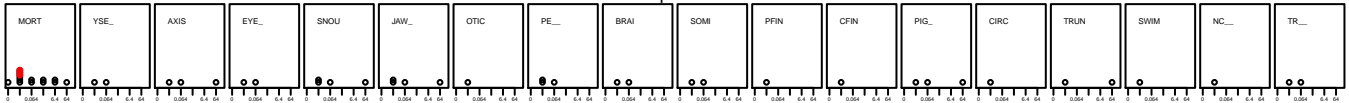

24-Dichlorophenoxyacetic acid

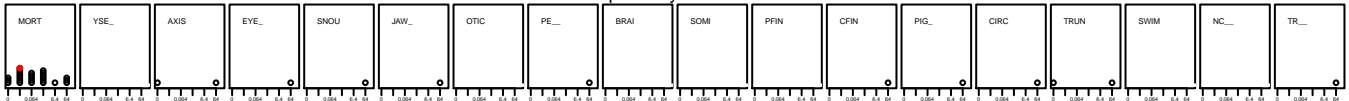

24-Dimethylphenol

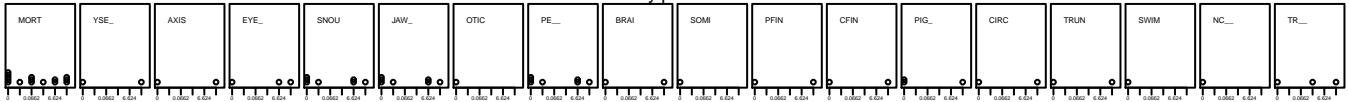

24-Dinitrophenol

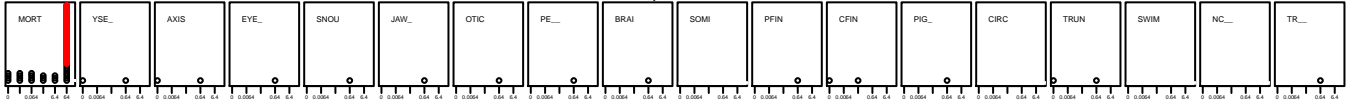

24-Dinitrotoluene

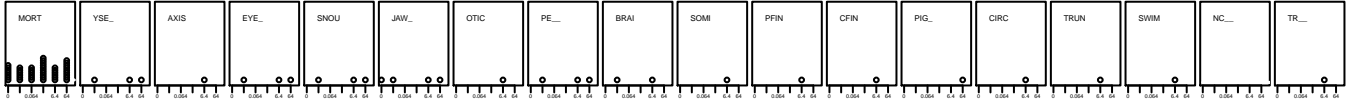

245-Trichlorophenol

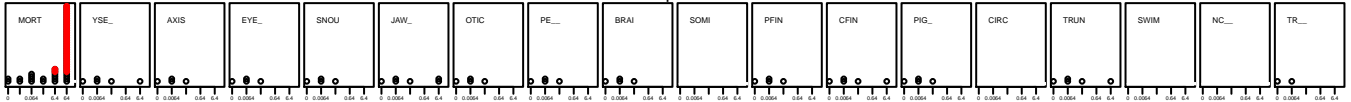

246-Trichlorophenol

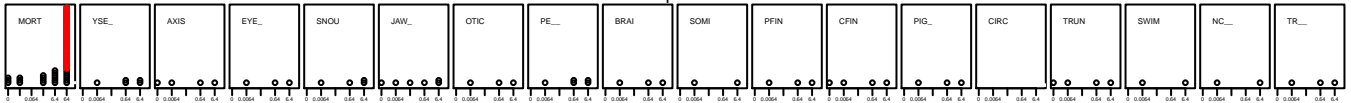

246-Trimethylphenol

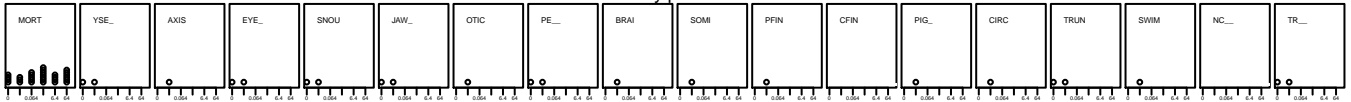

246-Tris(tert-butyl)phenol

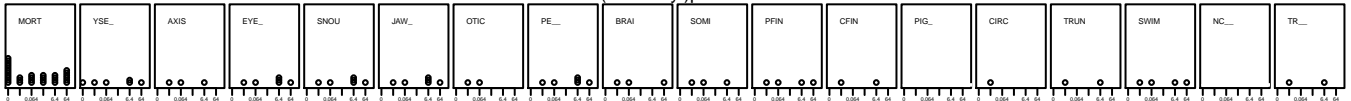

2479-Tetramethyl-5-decyne-47-diol

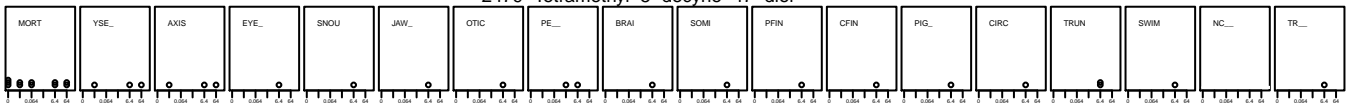

25-Di-tert-butylbenzene-14-diol

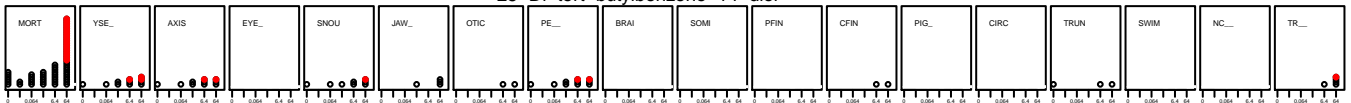

25-Dimethyl-25-di-(tert-butylperoxy)hexane

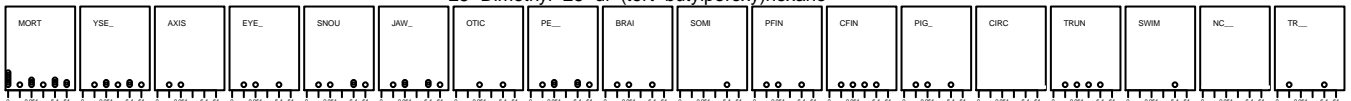

25-Dimethylphenol

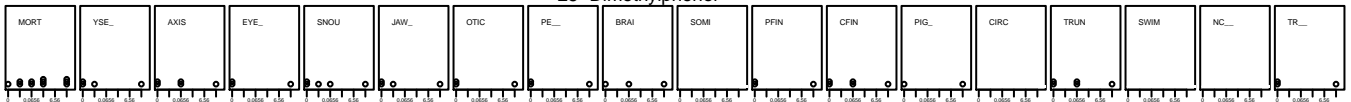

26-Di-tert-butylphenol

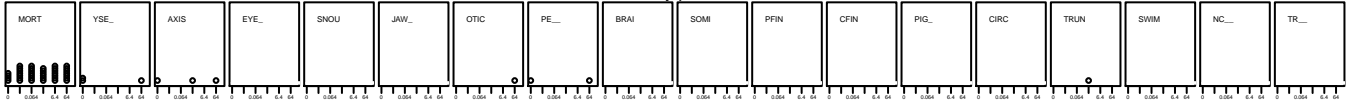

26-Dichloro-N-[3-(2-hydroxypropan-2-yl)-2-methyl-1-benzofuran-7-yl]benzamide

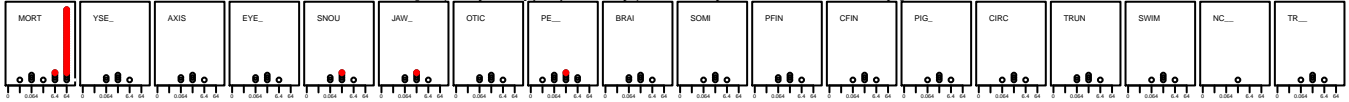

26-Diethylaniline

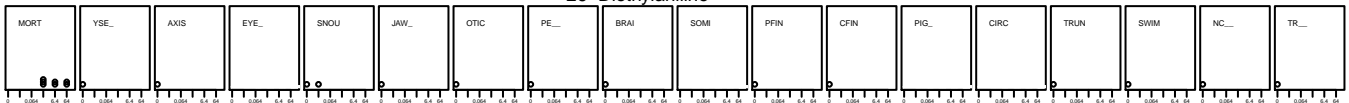

26-Dimethylaniline

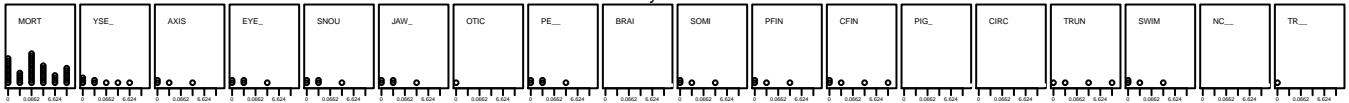

26-Dimethylphenol

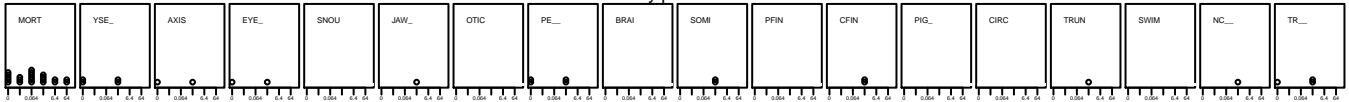

26-Dinitrotoluene

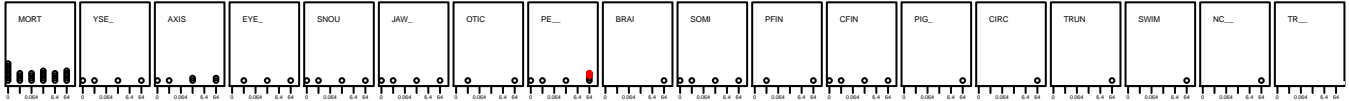

3-(((3R)-6-((5-fluoro-13-benzothiazol-2-yl)methoxy)-4-hydroxy-3,4-dihydro-2H-chromen-3-yl)methyl)benzoic acid

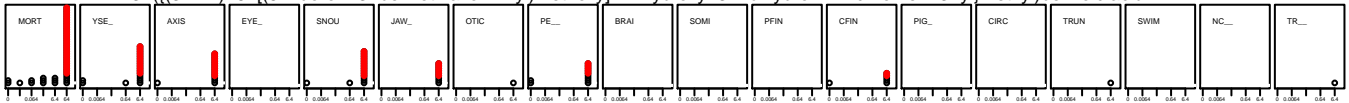

3-(1-(2-((2R)-4-benzoyl-2-(3,4-difluorophenyl)morpholin-2-yl)ethyl)-4-phenylpiperidin-4-yl)-11-dimethylurea hydrochloride (1:1)

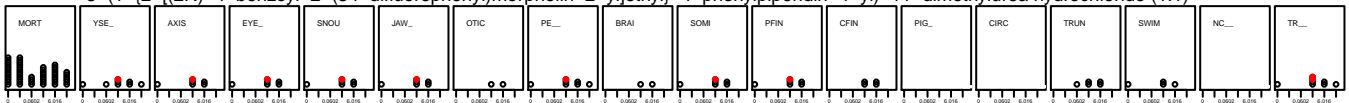

3-(1-(3-((3S)-1-benzoyl-3-(3,4-dichlorophenyl)piperidin-3-yl)propyl)-4-phenylpiperidin-4-yl)-11-dimethylurea

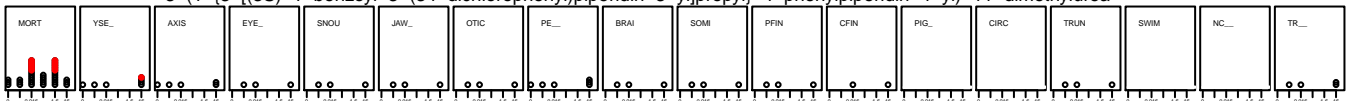

3-(2-Bromophenyl)-7-[[2-(hydroxymethyl)-2,3-dihydro-1,4-benzodioxin-6-yl]amino]-1-methyl-3,4-dihydropyrimido[4,5-d]pyrimidin-2(1H)-one

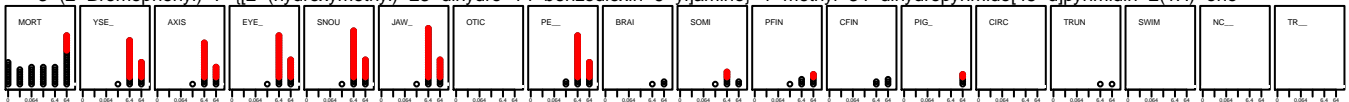

3-(Difluoromethyl)-1-(4-methoxyphenyl)-5-[4-(methylsulfinyl)phenyl]-1H-pyrazole

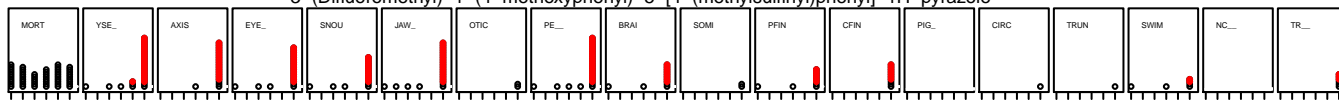

3-[(dimethylamino)methyl]-4-[3-methyl-4-(methylsulfonyl)phenoxy]benzenesulfonamide

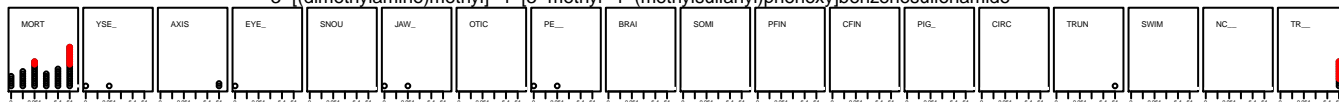

3-[[1-(aminomethyl)cyclohexyl]methyl]-124-oxadiazol-5(4H)-one hydrochloride

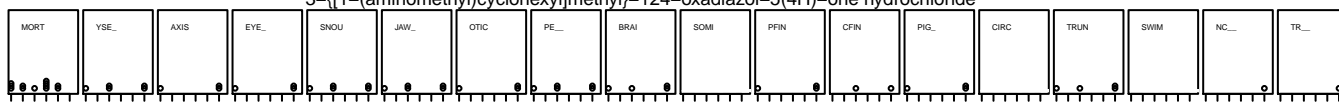

3-[[34-Bis(difluoromethoxy)phenyl](pyridin-3-ylmethyl)amino]benzoic acid

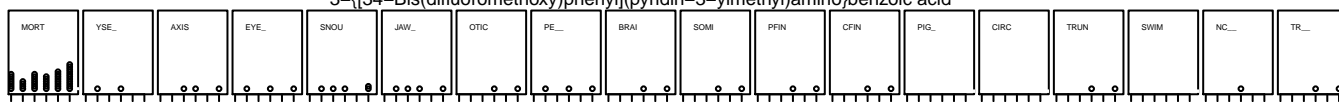

3-{4-[2-(5-methyl-2-phenyl-13-oxazol-4-yl)ethoxy]-1H-indol-1-yl}propanoic acid

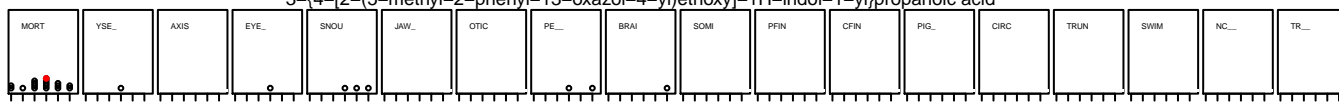

3-Bromo-1-propanol

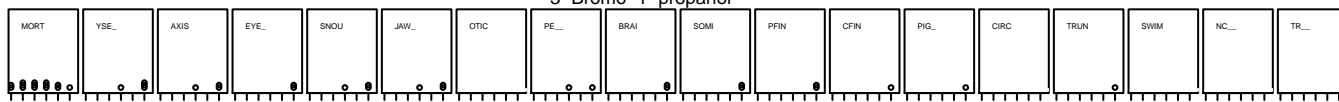

3-Buten-2-one 3-methyl-4-(266-trimethyl-2-cyclohexen-1-yl)-

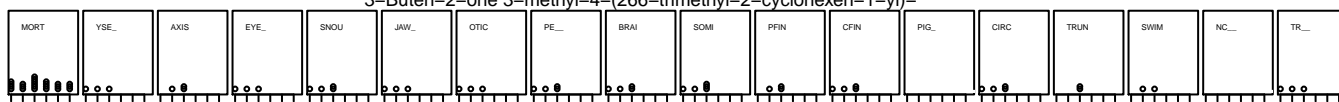

chloro-2-[(3R)-5-chloro-1-(24-dimethoxybenzyl)-3-methyl-2-oxo-23-dihydro-1H-indol-3-yl]-N-ethyl-N-(pyridin-3-ylmethyl)benzamide hydrochloride

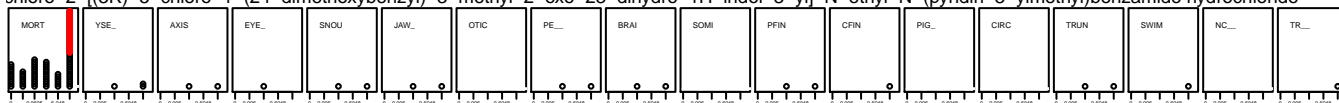

3-ethyl-5-{5-[[4-ethylpiperazin-1-yl]sulfonyl]-2-propoxyphenyl}-2-(pyridin-2-ylmethyl)-26-dihydro-7H-pyrazolo[4,3-d]pyrimidin-7-one

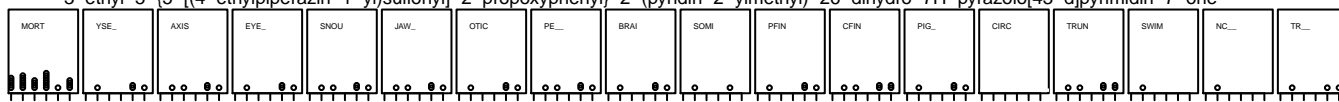

3-Hydroxyfluorene

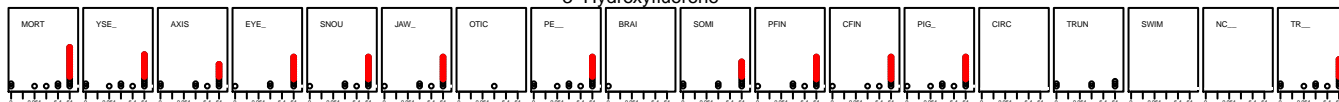

3-Iodo-2-propynyl-N-butylcarbamate

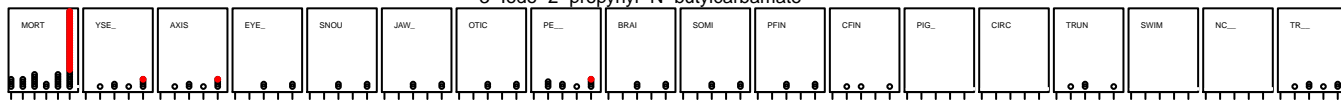

3-Methylaniline

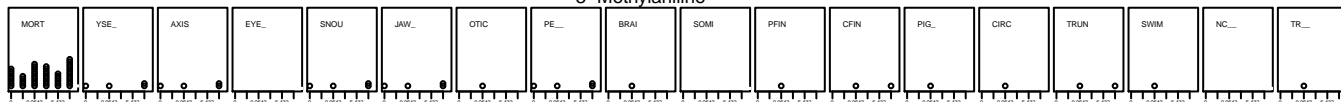

3-Methylbutyl acetate

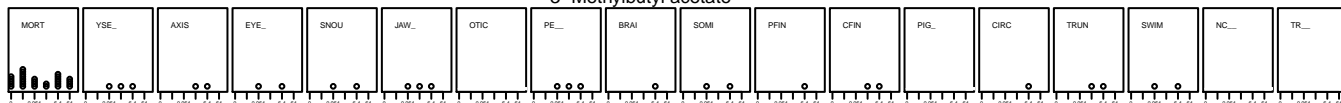

3-Nitrotoluene

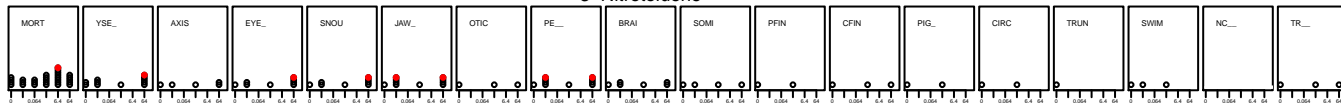

3-Phenoxybenzoic acid

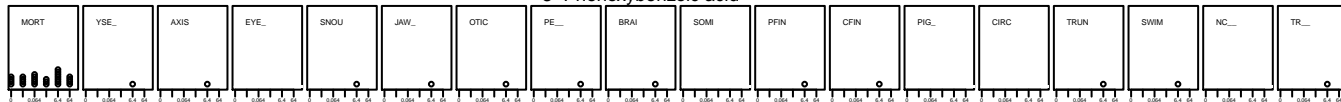

3-Pyridinecarbonitrile

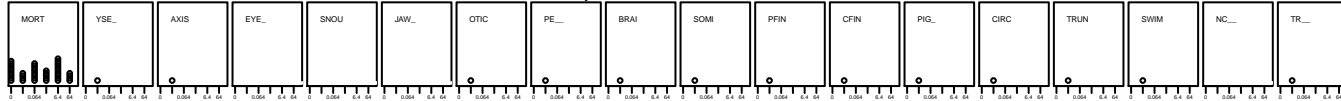

3-pyridinecarboxamide 2-(213-benzoxadiazol-5-yloxy)-N-[[4-(1-hydroxy-1-methylethyl)phenyl]methyl]-

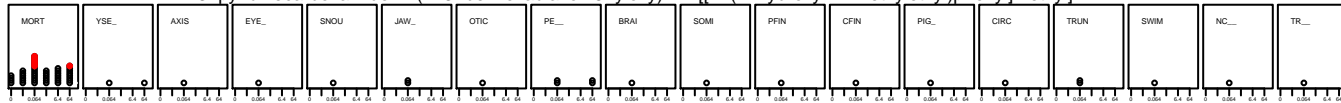

3'-Azido-3'-deoxythymidine

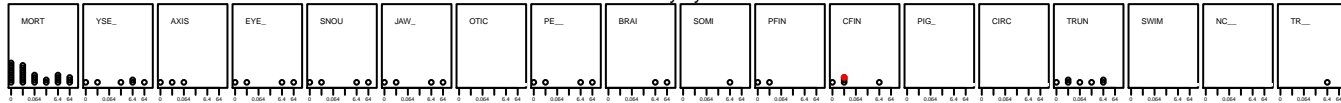

33755?-Tetraiodothyroacetic acid

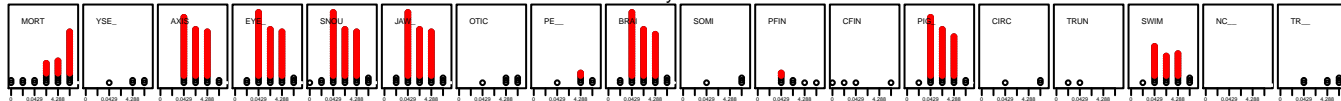

33'-Dimethoxybenzidine

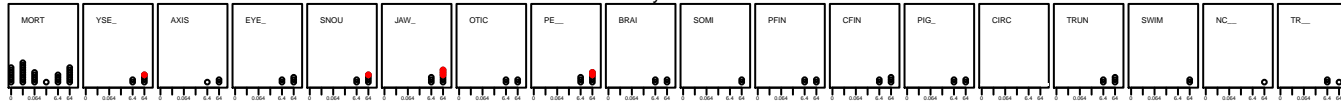

33'-Dimethoxybenzidine dihydrochloride

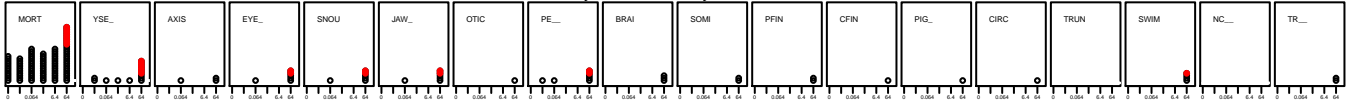

33'-Dimethylbenzidine

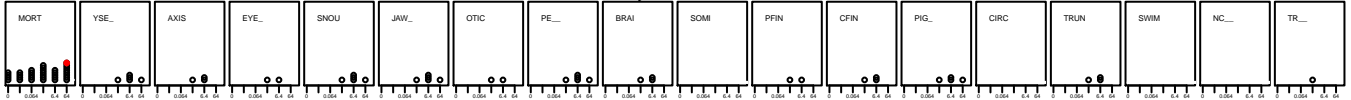

33.55.-Tetrabromobisphenol A

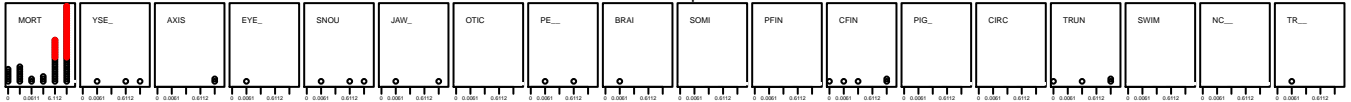

3344556677888-Tridecafluorooctan-1-ol

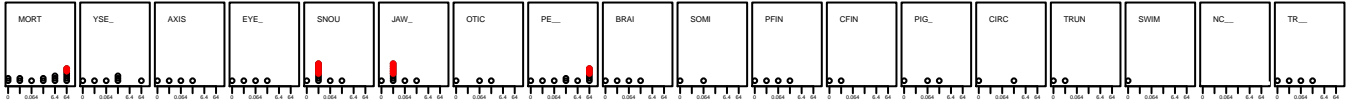

3344556677888-Tridecafluorooctyl methacrylate

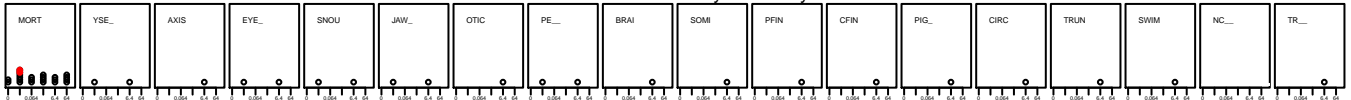

34-Diaminotoluene

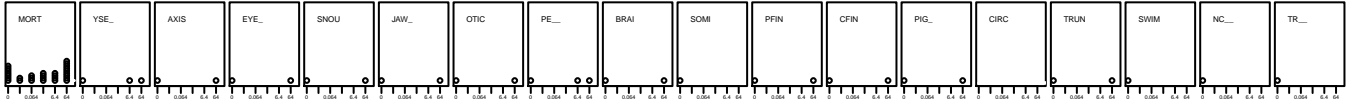

34-Dichloronitrobenzene

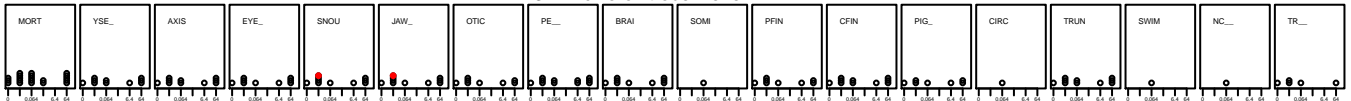

34-Dimethylphenol

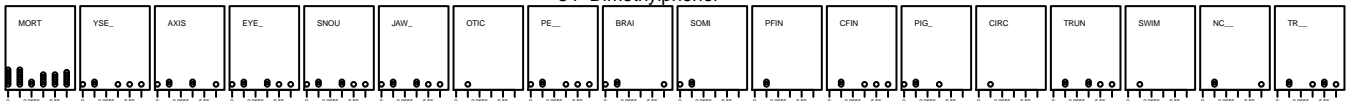

353'-Triiodothyronine

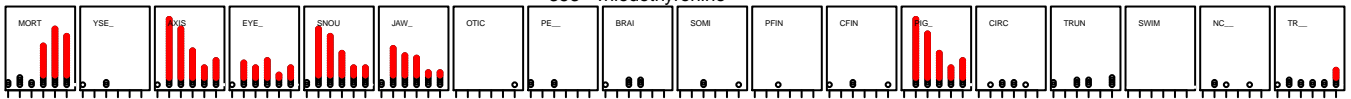

37-Dimethyl-26-octadienal

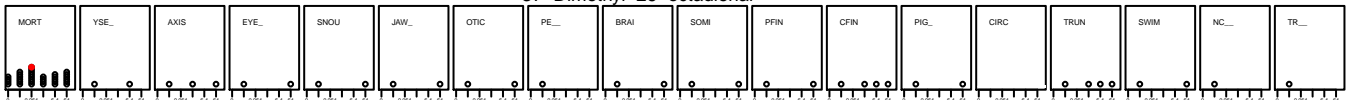

3a477a-Tetrahydro-47-methanoisobenzofuran-13-dione

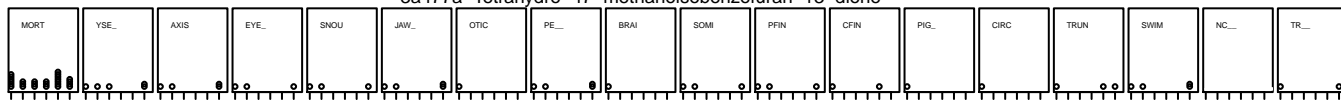

4-((4-(4-fluorophenoxy)phenyl)sulfonyl)amino)-N-hydroxytetrahydro-2H-pyran-4-carboxamide

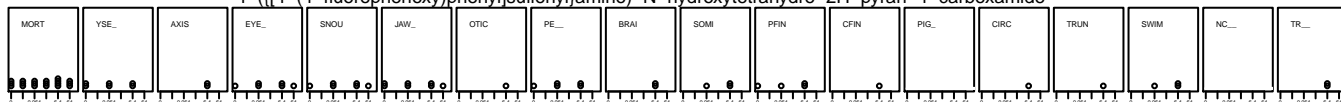

4-(1133-Tetramethylbutyl)phenol

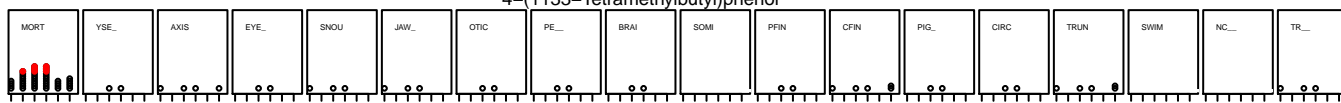

4-(2-Methylbutan-2-yl)cyclohexanol

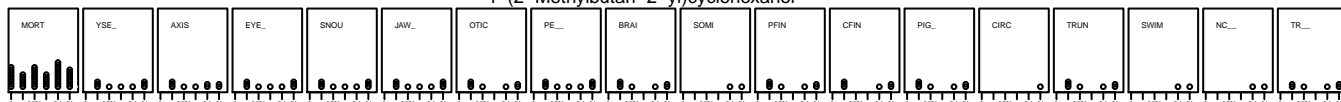

4-(2-Methylbutan-2-yl)phenol

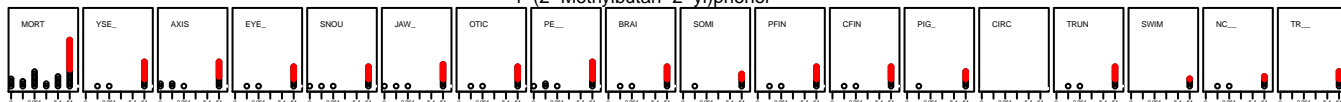

4-(24-Dichlorophenoxy)butyric acid

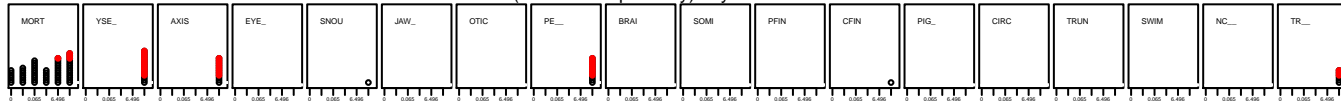

4-(3-((4-(2-methyl-1H-imidazol-1-yl)phenyl)sulfonyl)phenyl)tetrahydro-2H-pyran-4-carboxamide methanesulfonate

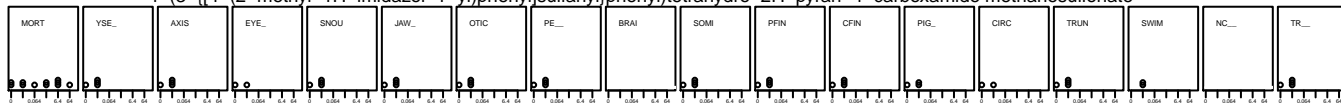

4-(Butan-2-yl)phenol

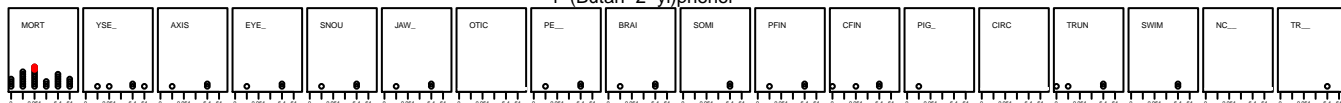

-Cyclopentyl-77-difluoro-5-methyl-6-oxo-6789-tetrahydro-5H-pyrimido[45-b][14]diazepin-2-yl)amino]-3-methoxy-N-(1-methylpiperidin-4-yl)benzamide

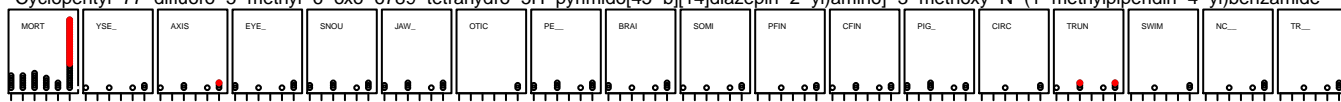

4-Amino-124-triazole

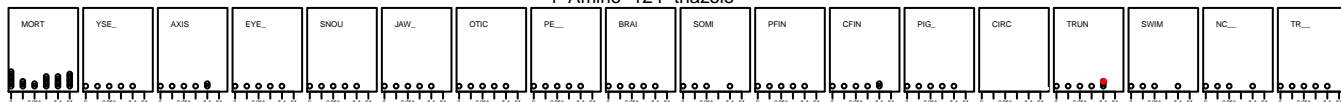

4-Aminoazobenzene

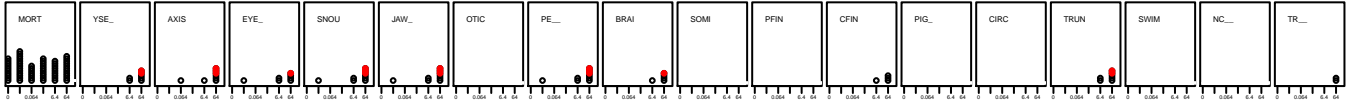

4-Aminobenzoic acid

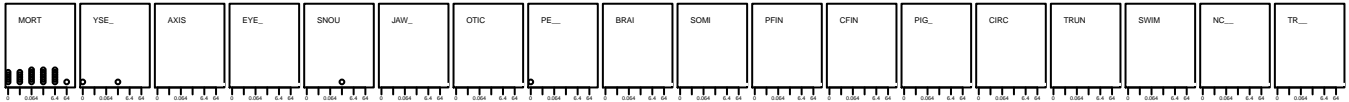

4-Aminofolic acid

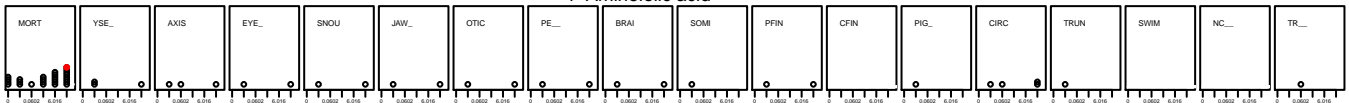

4-Androstene-3,17-dione

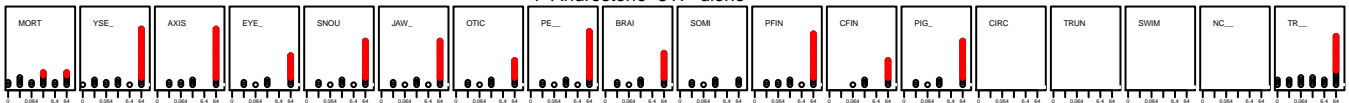

4-bromophenyl 14-diazabicyclo[3.2.2]nonane-4-carboxylate

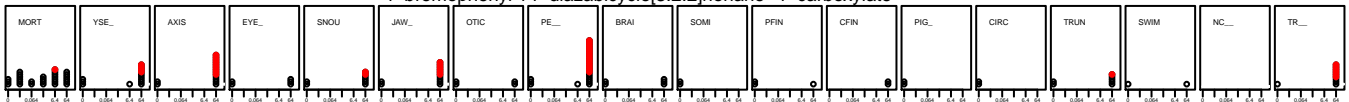

4-Butyrolactone

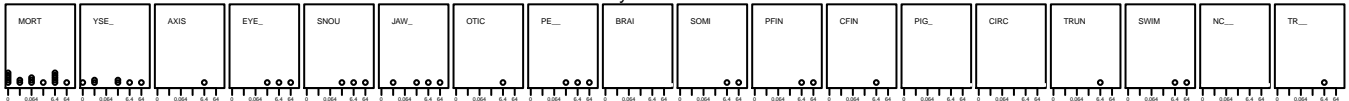

4-Chloro-1,2-diaminobenzene

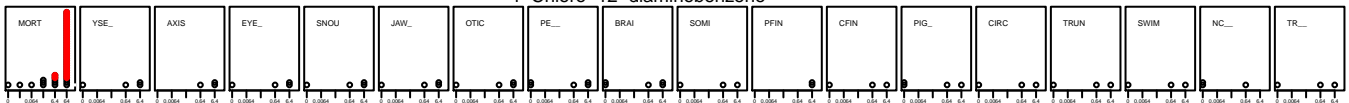

fluoro-5-([(4-(3-fluorophenyl)-4-(2-[3-(2-methyl-1H-benzimidazol-1-yl)-8-azabicyclo[3.2.1]oct-8-yl]ethyl)piperidin-1-yl]carbonyl)-N-methylbenzenesulfonam

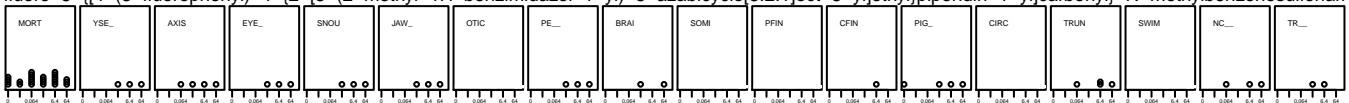

4-Chloro-3-methylphenol

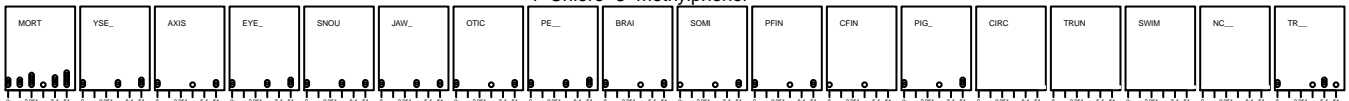

4-Chloroaniline

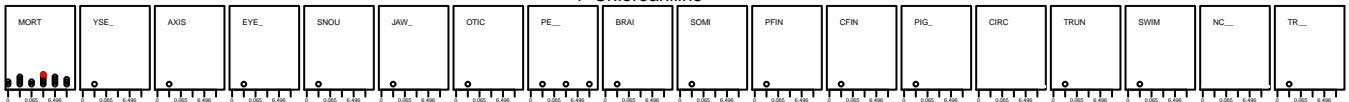



4-Chlorobenzotrichloride

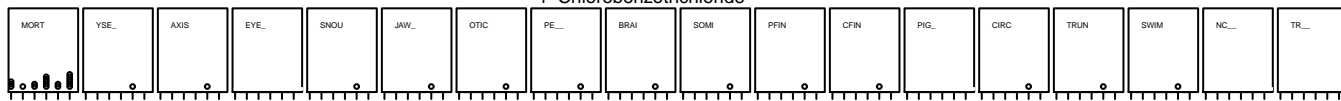

4-Chlorotoluene

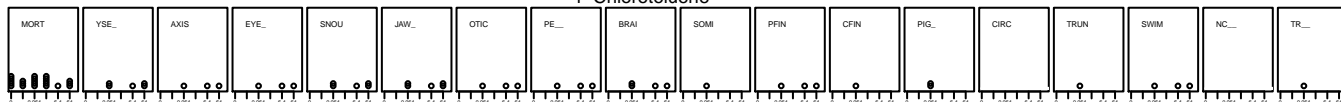

4-Cumylphenol

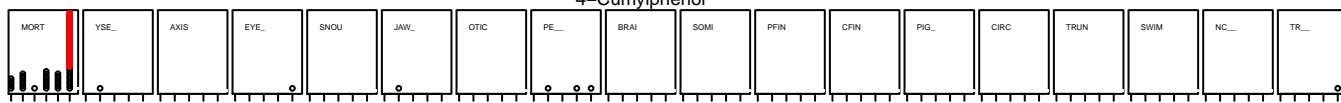

4-Cyclohexylcyclohexanol

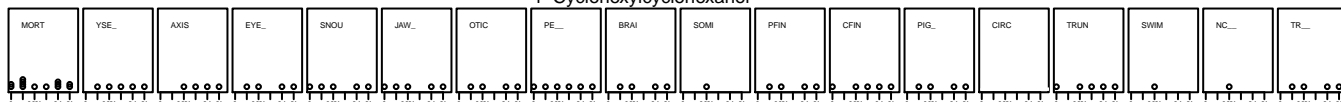

4-Cyclohexylcyclohexanone

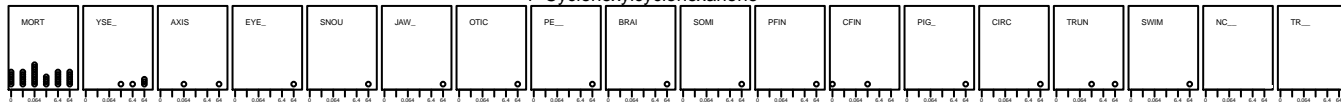

4-Ethyloct-1-yn-3-ol

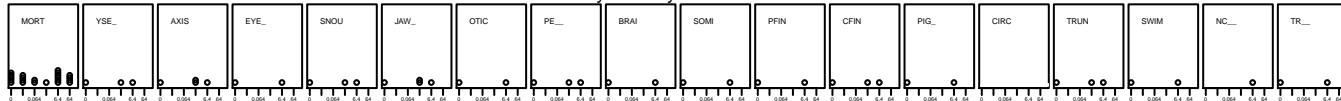

4-Heptylphenol

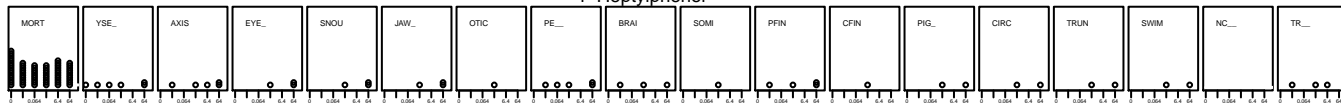

4-Hexylresorcinol

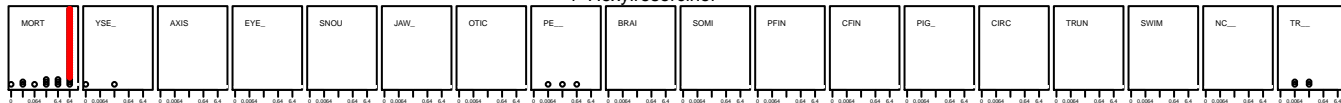

4-Hydroxy-3-methoxybenzaldehyde

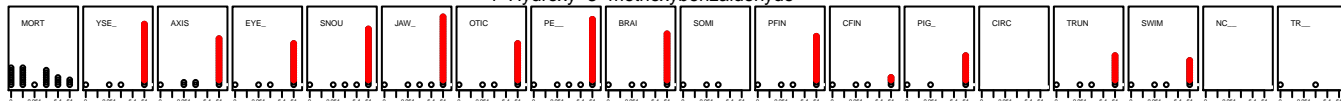

4-Hydroxytamoxifen

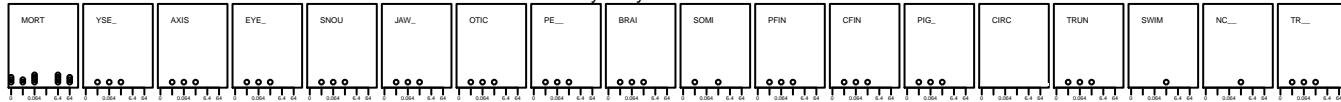

4-Methyl-2-pentanol

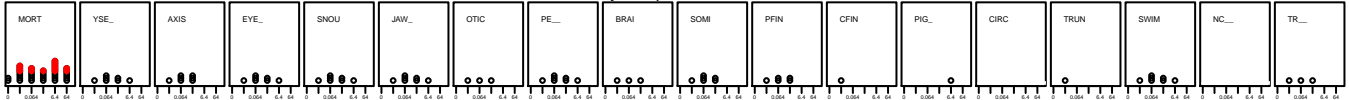

4-Methylaniline

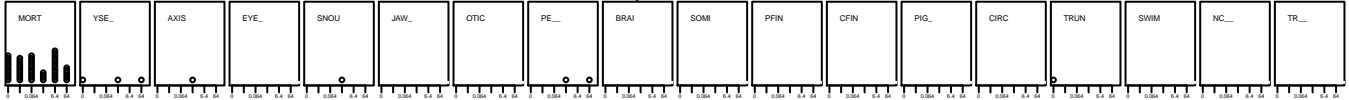

4-Methylphenol

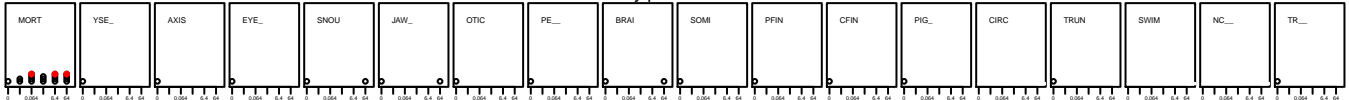

4-Nitroaniline

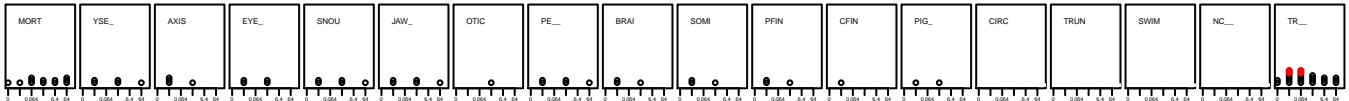

4-Nitrobenzoic acid

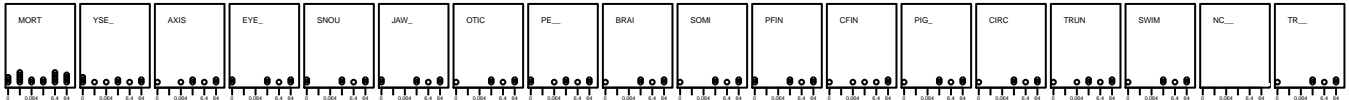

4-Nitrophenol

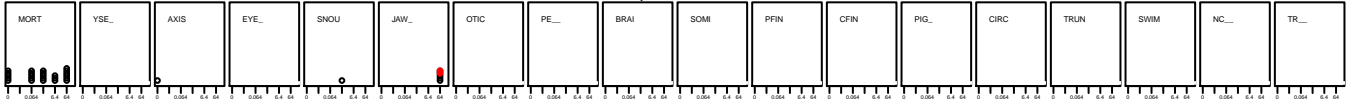

4-Nitrotoluene

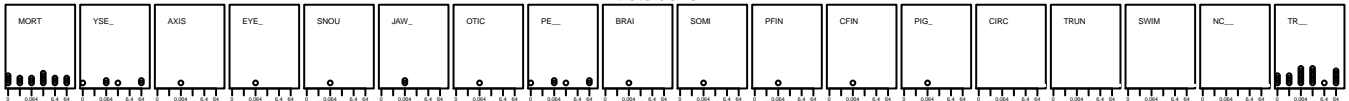

4-Nonylphenol

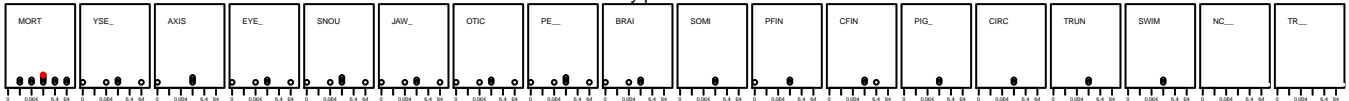

4-Nonylphenol branched

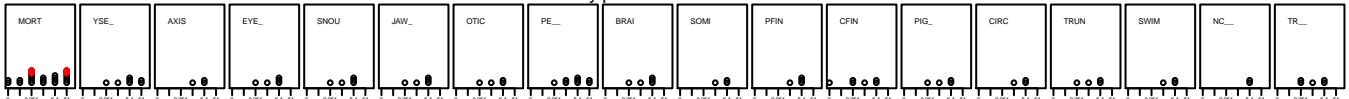

4-Octylphenol

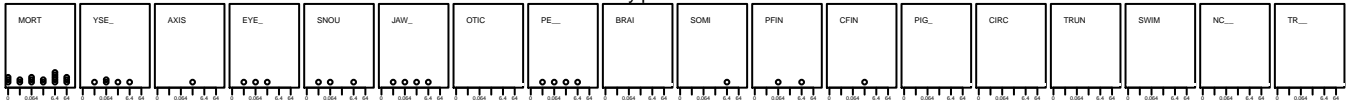

4-Pentylaniline

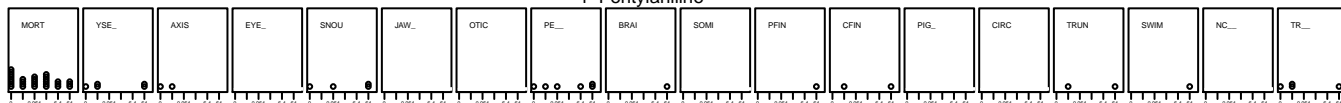

4-tert-Butylphenol

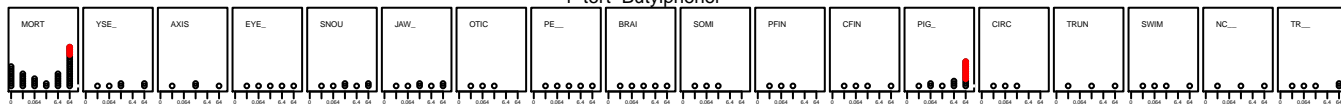

4-Vinyl-1-cyclohexene dioxide

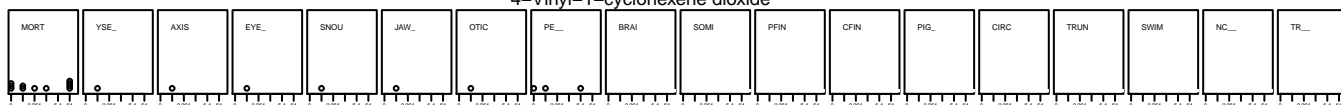

4,4'-Bipyridine

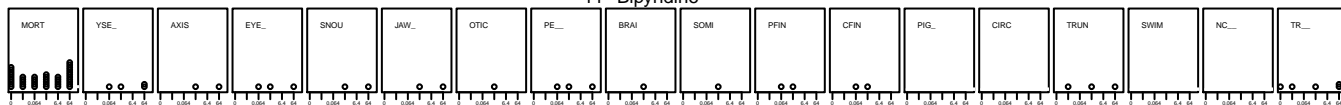

4,4'-Methylenebis(2-methylaniline)

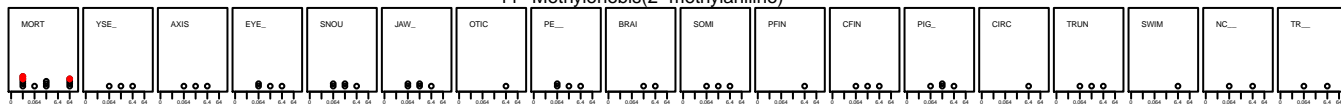

4,4'-Methylenebis(NN-dimethylaniline)

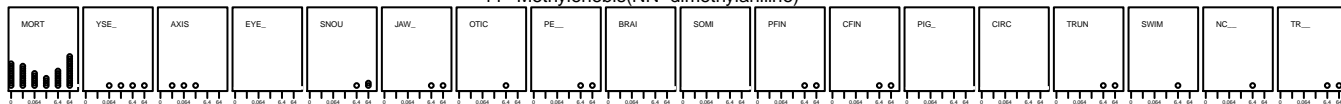

4,4'-Methylenedianiline

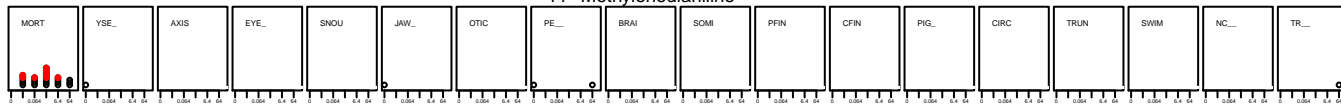

4,4'-Oxydianiline

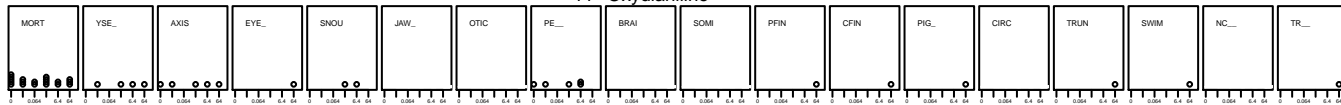

4,4'-Sulfonylbis[2-(prop-2-en-1-yl)phenol]

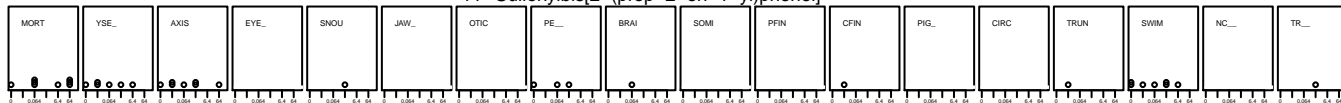

4,4,4'-Ethane-1,1,1-triyltriphenol

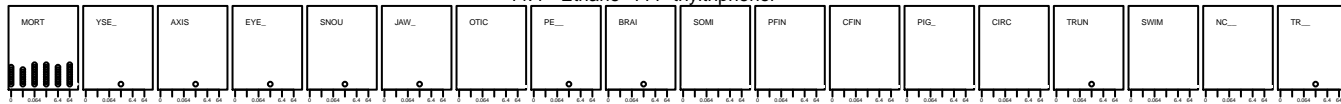

5-(2-Chlorophenyl)-3-methyl-7-nitro-2,10-dihydropyrazolo[3,4-b][1,4]benzodiazepine

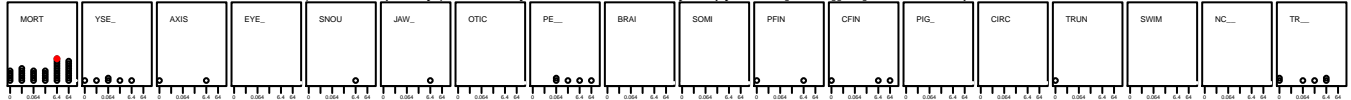

5-(2,4-Difluorophenoxy)-2-((2-hydroxy-2-methylpropyl)amino)-8-methylpyrido[2,3-d]pyrimidin-7(8H)-one hydrochloride (1:1)

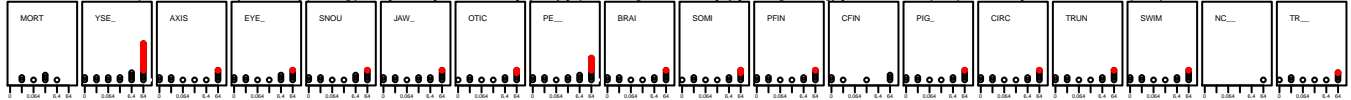

5-(Benzyloxy)-2-((2-(dimethylamino)ethyl)(ethyl)amino)-NN-Diethyl-4-(4-phenylpiperidin-1-yl)benzamide trifluoroacetate (1:1)

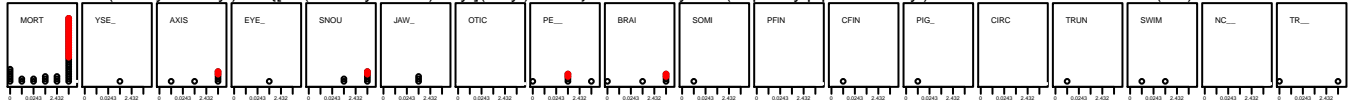

5-[2-methyl-3-(pyridin-3-yl)-1H-indol-1-yl]pentanoic acid

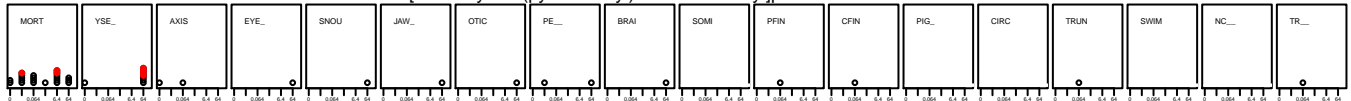

5-Amino-2-methylphenol

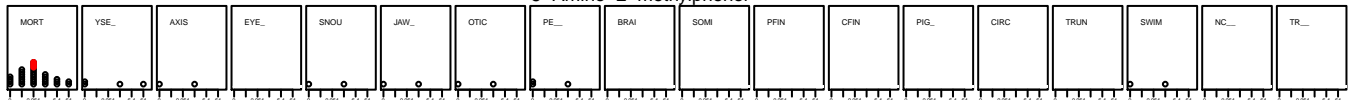

5-Chloro-2-methyl-3(2H)-isothiazolone

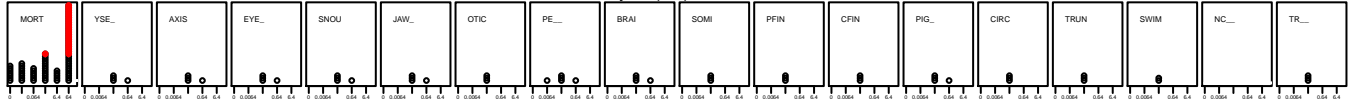

5-Ethyl-1-aza-3,7-dioxabicyclo[3.3.0]octane

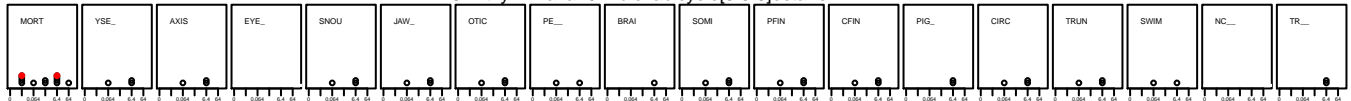

5-fluoro-1-(3-fluorobenzyl)-N-(1H-indol-5-yl)-1H-indole-2-carboxamide

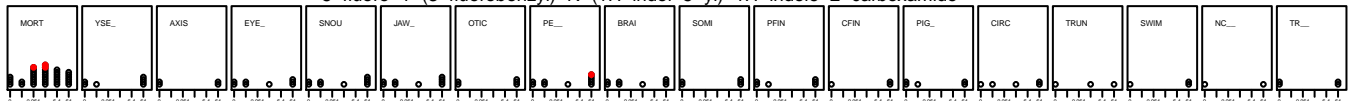

5-Fluorouracil

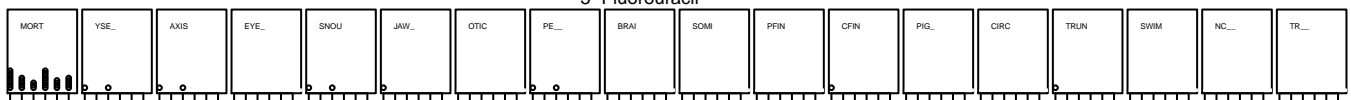

5-Heptyldihydro-2(3H)-furanone

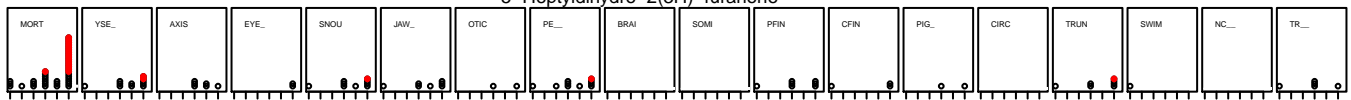



6-Methyl-2-thiouracil

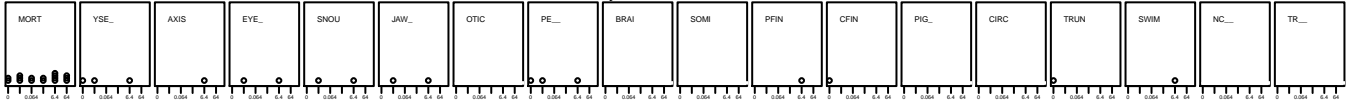

6-Methylquinoline

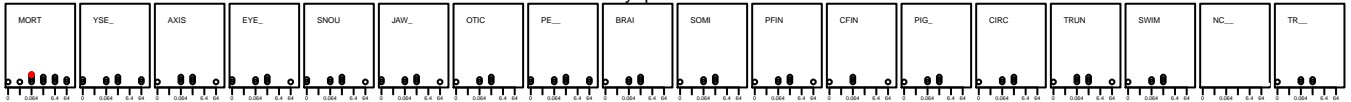

6-Propyl-2-thiouracil

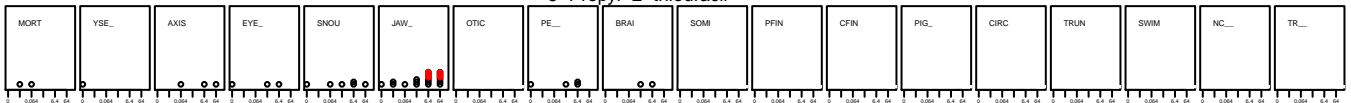

6-Thioguanine

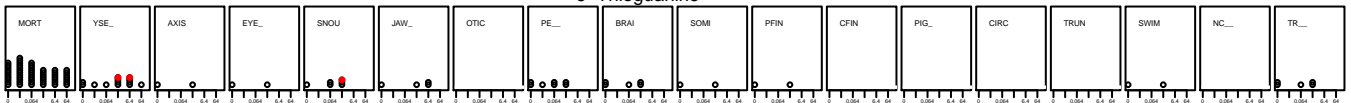

67-dichloro-5-[3-(methoxymethyl)-5-(1-oxidopyridin-3-yl)-4H-124-triazol-4-yl]-14-dihydroquinoxaline-23-dione

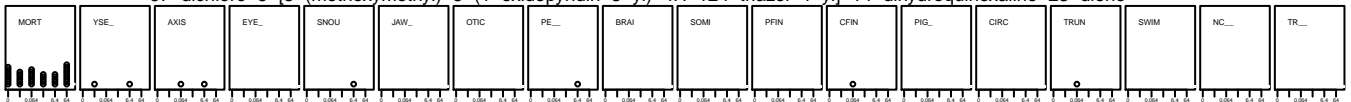

712-Dimethylbenz(a)anthracene

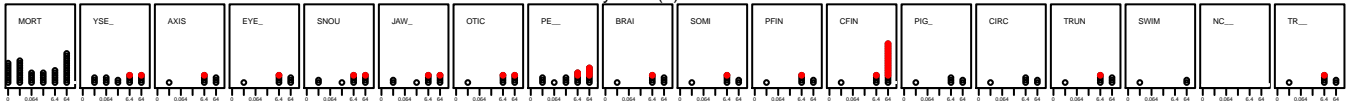

8-Hydroxyquinoline

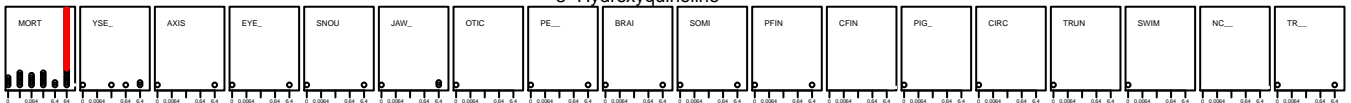

9-Phenanthrol

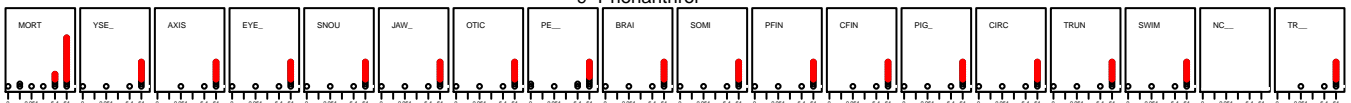

Abamectin

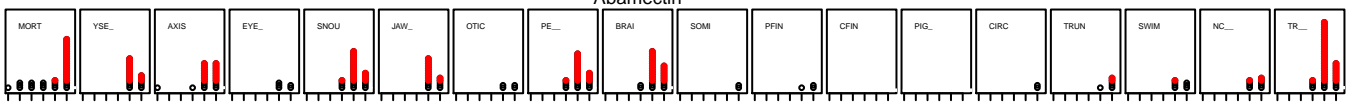

Acenaphthene

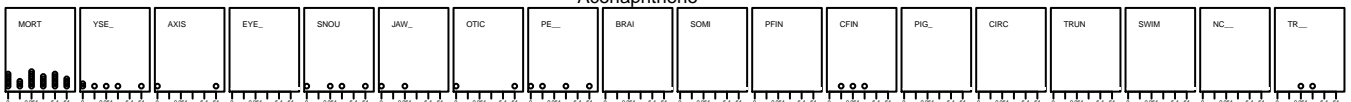

Acenaphthylene

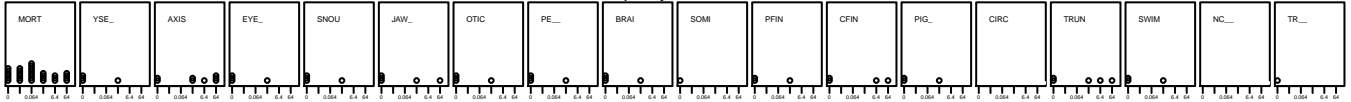

Acephate

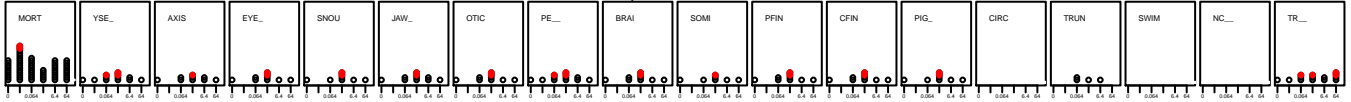

Acetamide

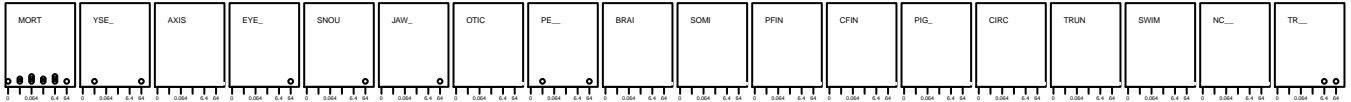

Acetaminophen

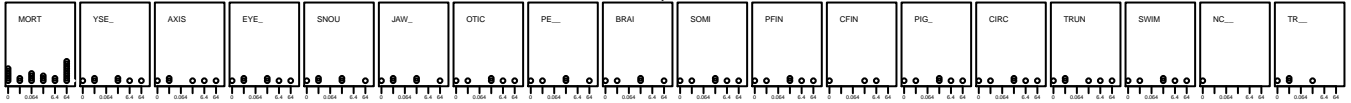

Acetamiprid

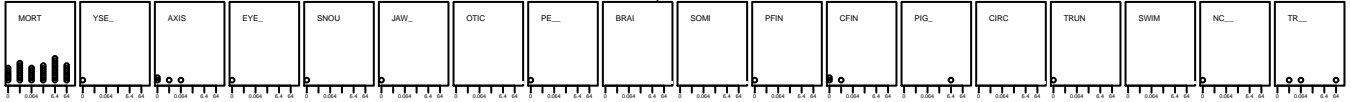

Acetic acid

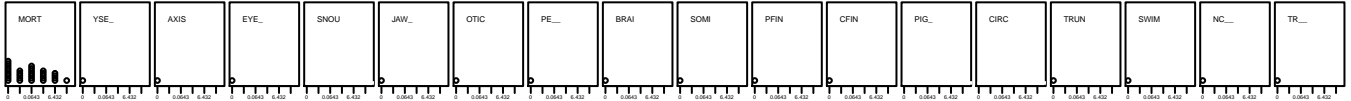

Acetochlor

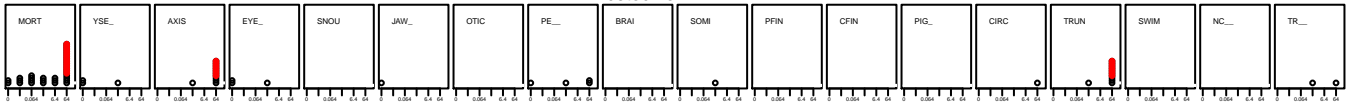

Acetophenone

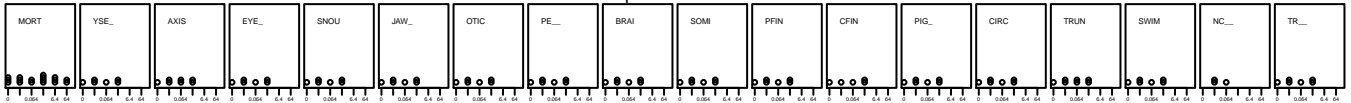

Acetyl tributyl citrate

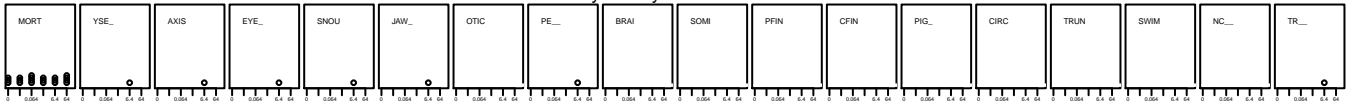

Acetyltriethyl citrate

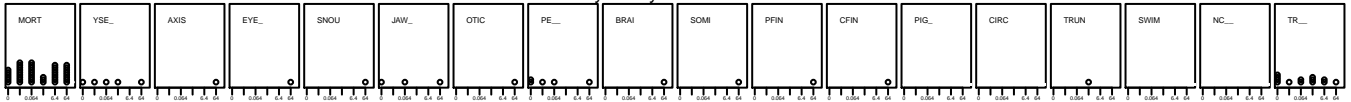

Acibenzolar-S-methyl

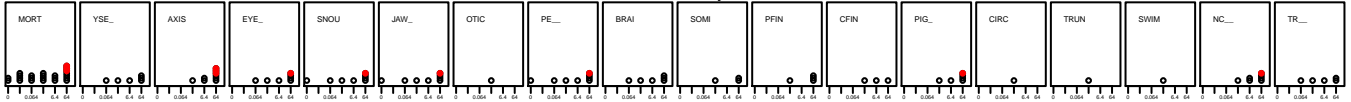

Acifluorfen

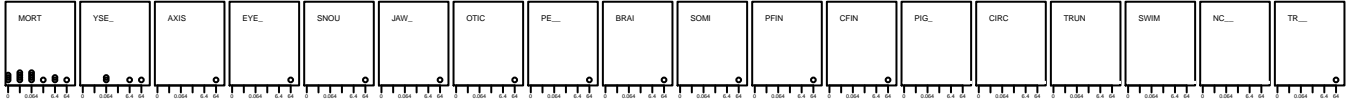

Acrylamide

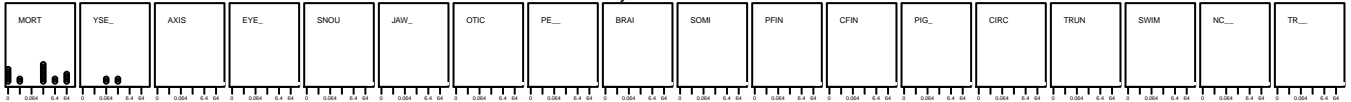

Adipic acid polypropyleneglycol laurate

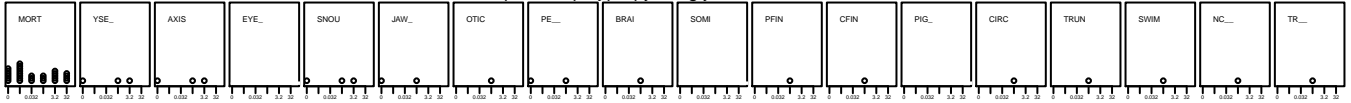

Alachlor

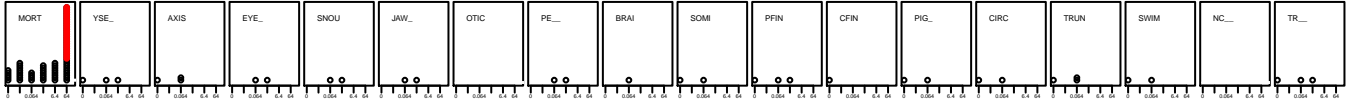

Aldicarb

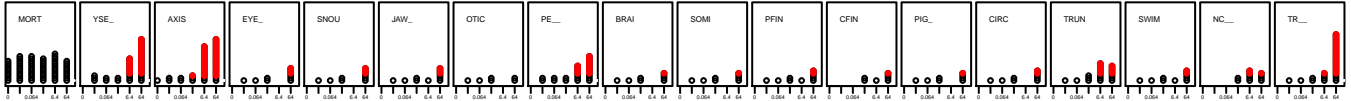

Aldicarb oxime

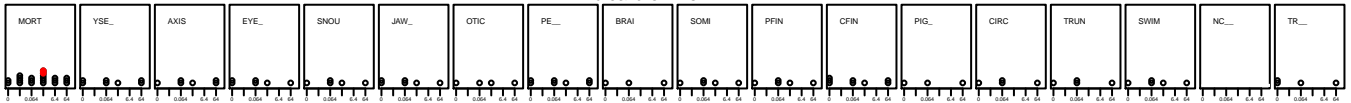

Aldrin

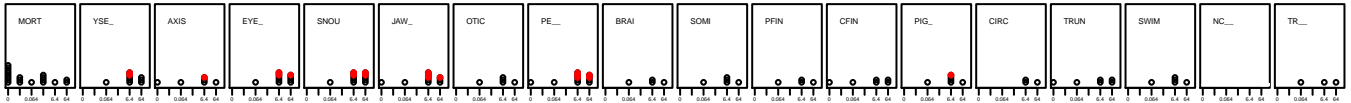

Allethrin

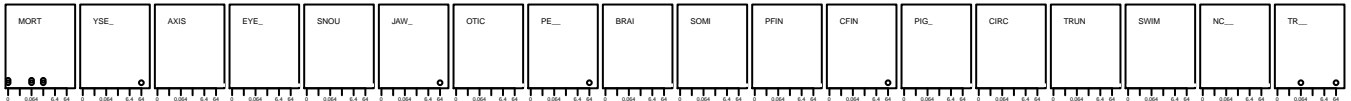

Allura red

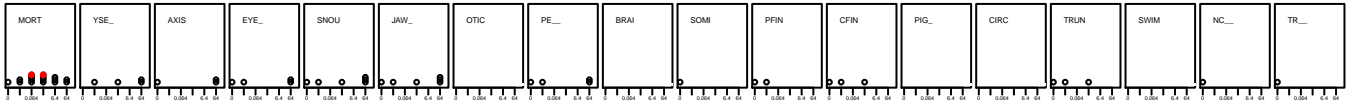



alpha-Cyclodextrin

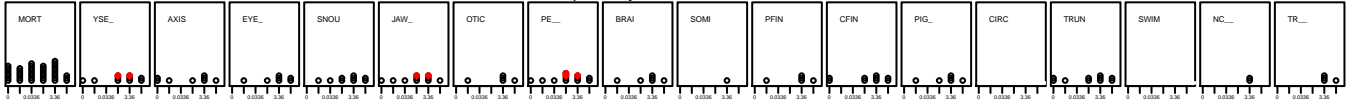

Ametryn

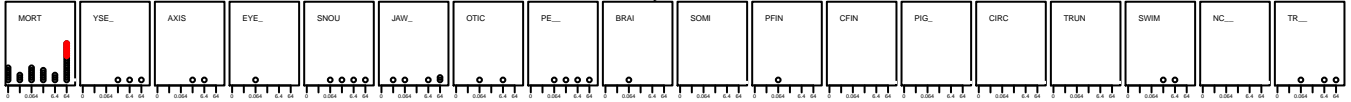

Amiodarone hydrochloride

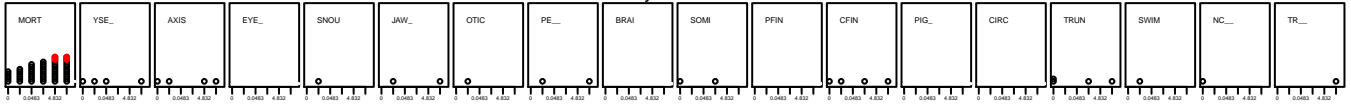

Amitraz

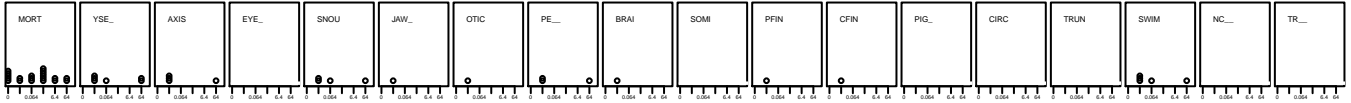

Ammonium carbamate

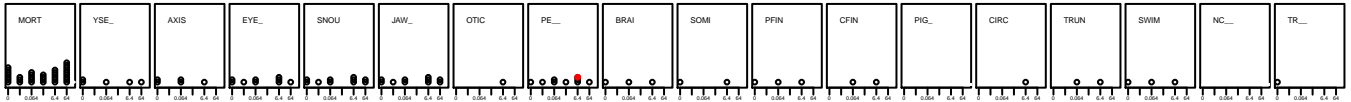

Ammonium perfluorooctanoate

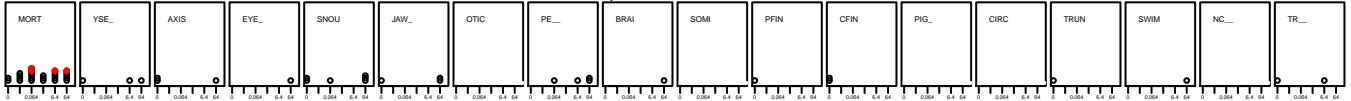

Anilazine

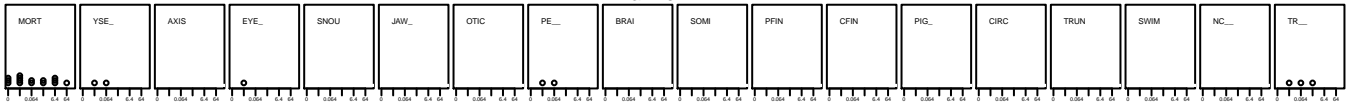

Anthracene

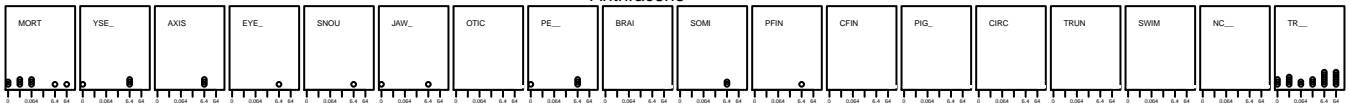

Anthrain

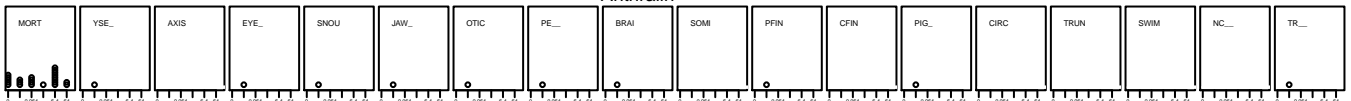

Aplaviroc hydrochloride

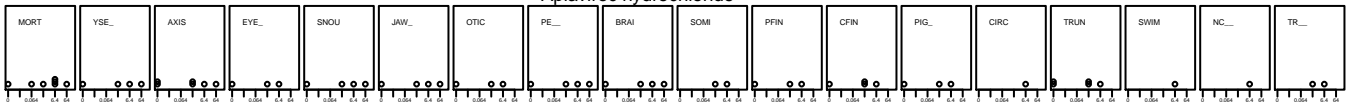

Aspirin

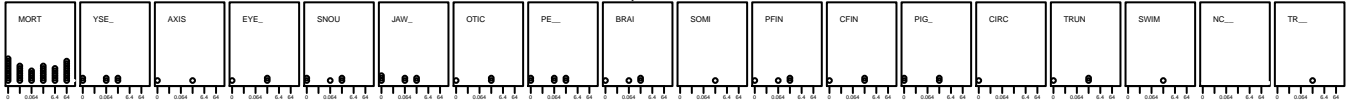

Asulam

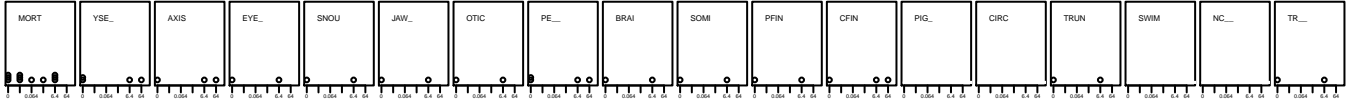

Atrazine

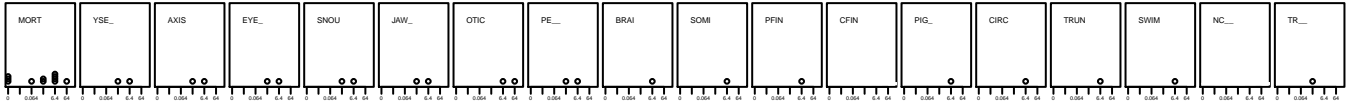

Azamethiphos

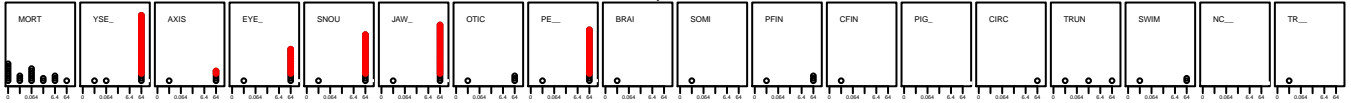

Azathioprine

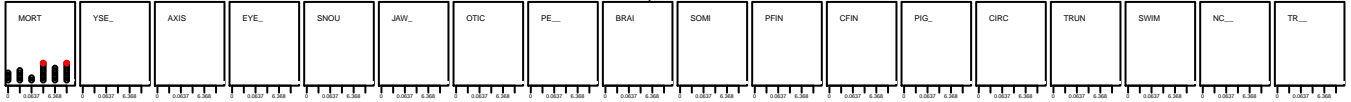

Azinphos-methyl

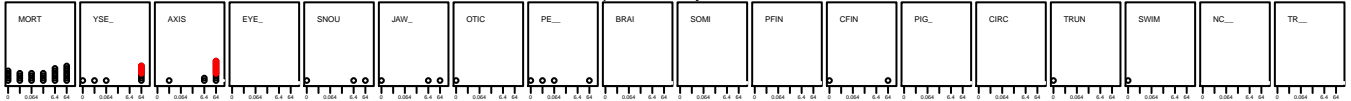

Azobenzene

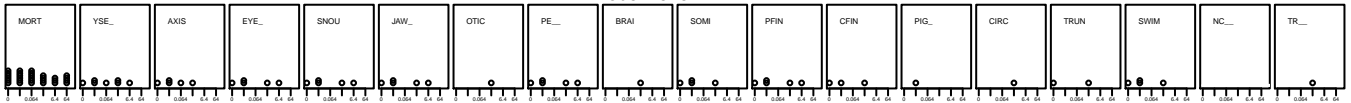

Azoxystrobin

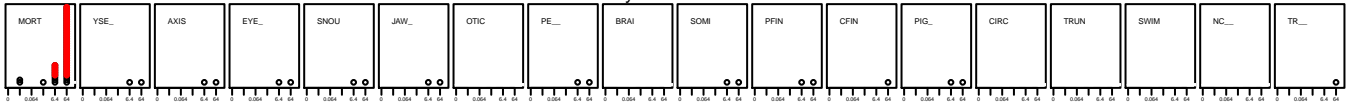

Bendiocarb

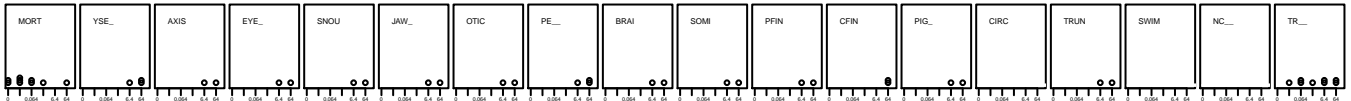

Benfluralin

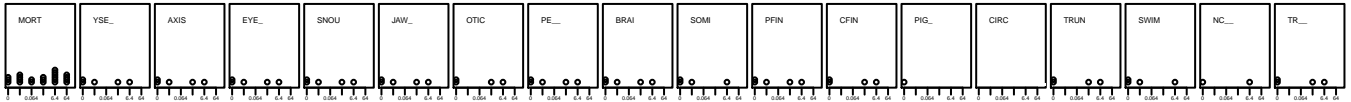



Benzophenone

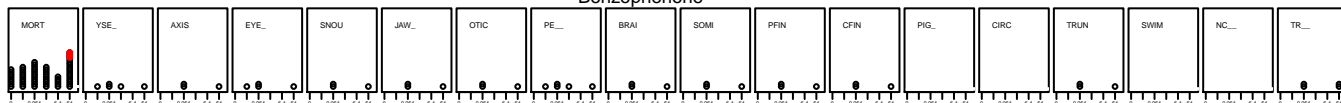

Benzotrichloride

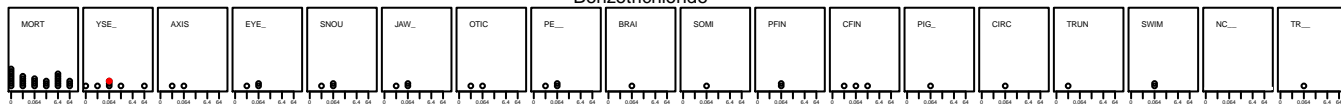

Benzyl alcohol

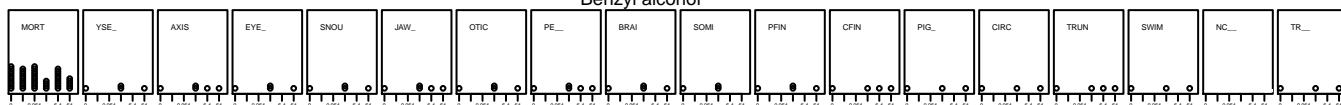

Benzyl octyl adipate

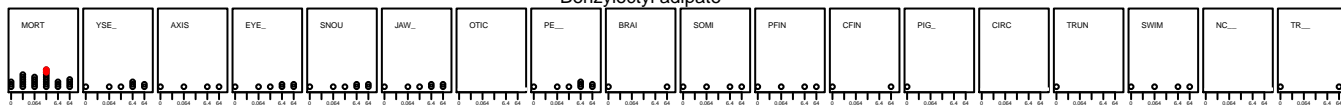

Besoprodil

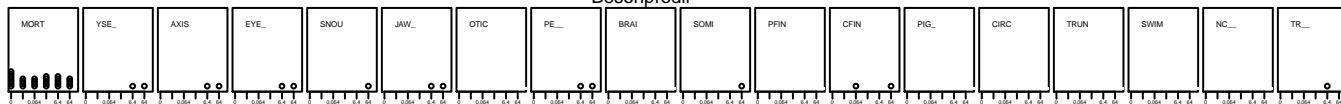

beta-123456-Hexachlorocyclohexane

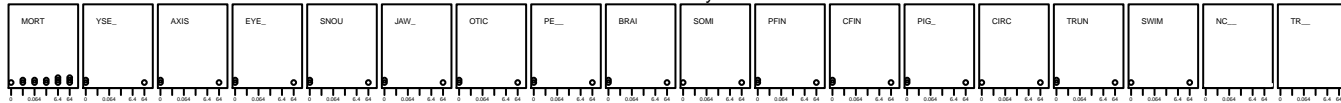

Bifentazate

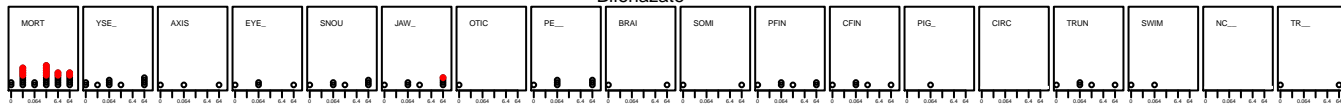

Bifenthrin

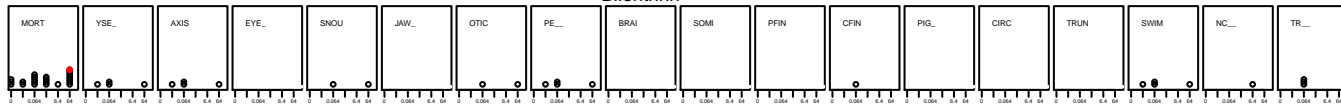

Biphenyl

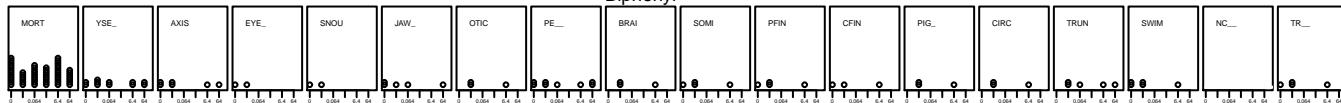

Bis(2-chloroethyl) ether

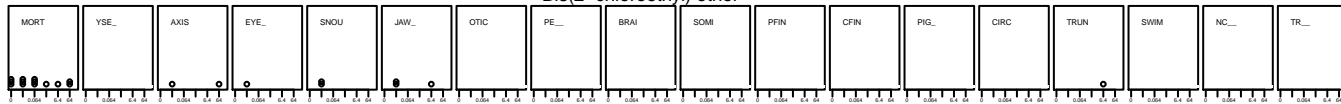

Bis(2-ethylhexyl) decanedioate

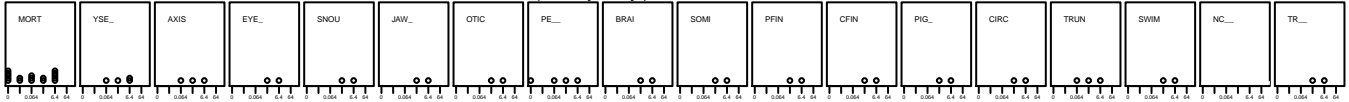

Bis(2-ethylhexyl) nonanedioate

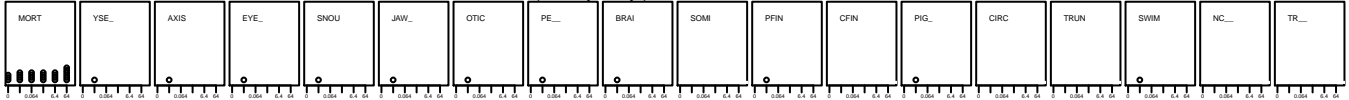

Bis(2-ethylhexyl) terephthalate

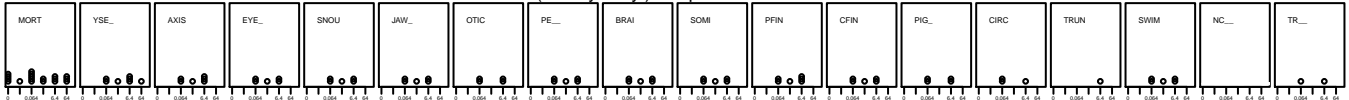

Bis(2-methoxyethyl) ether

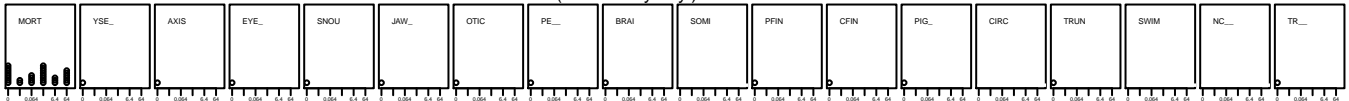

Bisphenol A

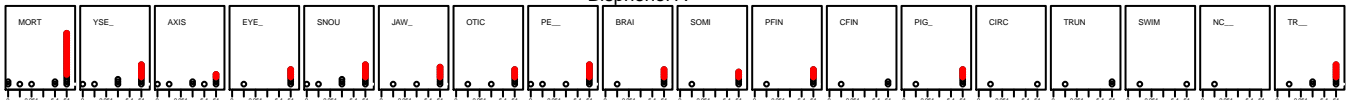

Bisphenol AF

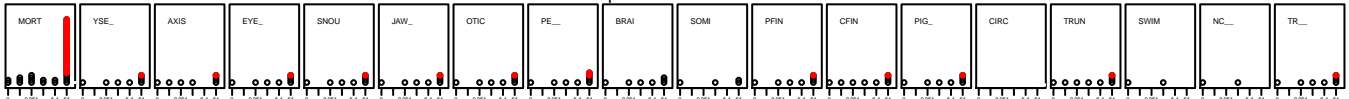

Bisphenol B

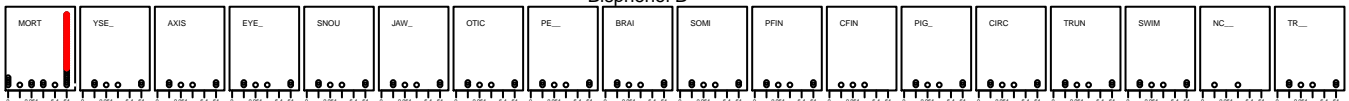

Boric acid

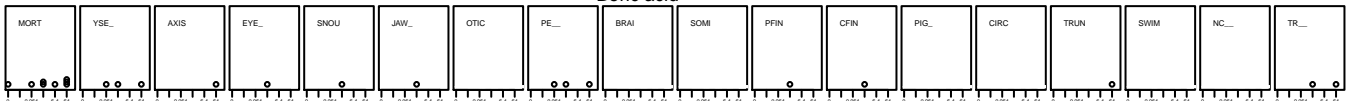

Boscalid

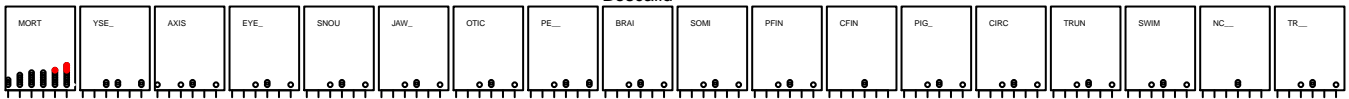

Bromacil

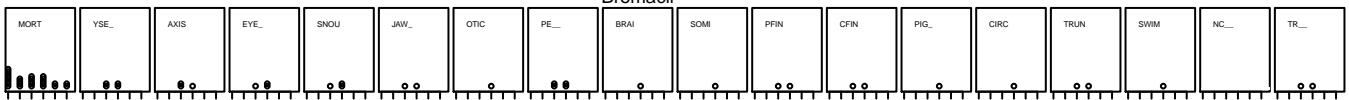

Bromoxynil

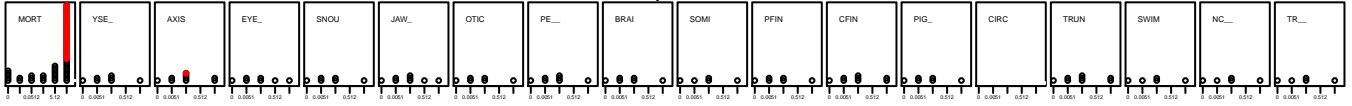

Bronopol

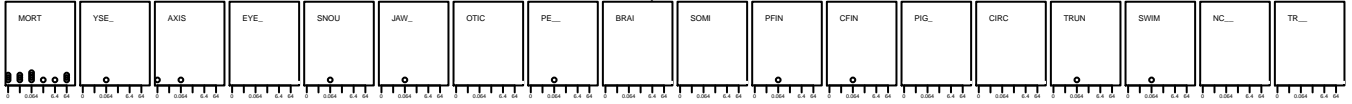

Bupropfen

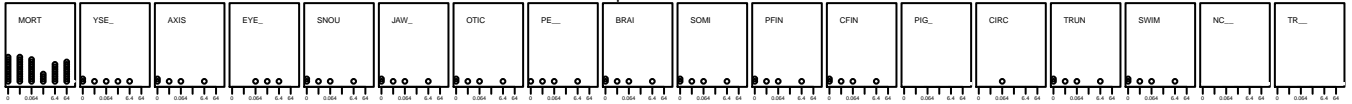

Busulfan

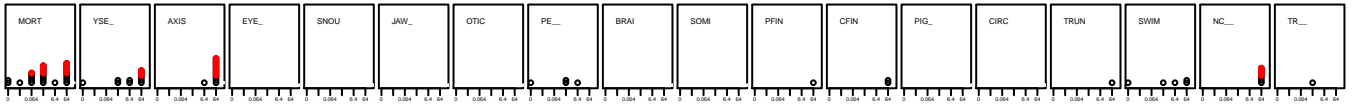

Butachlor

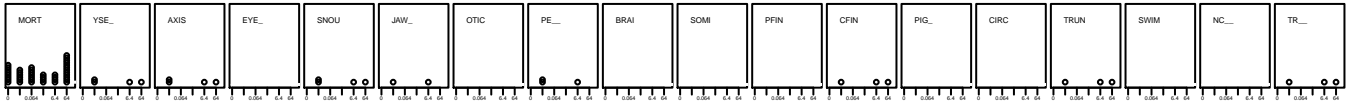

Butafenacil

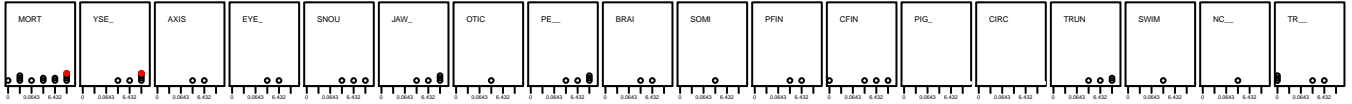

Butam

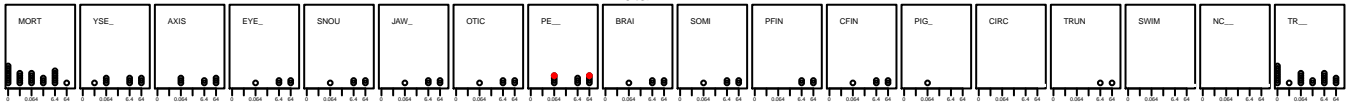

Butanoic acid

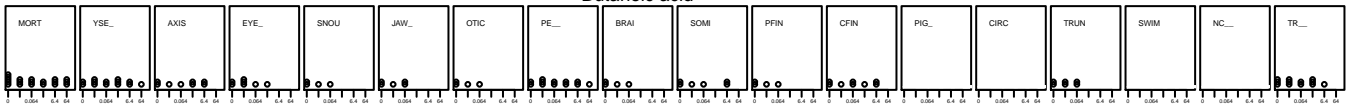

Butralin

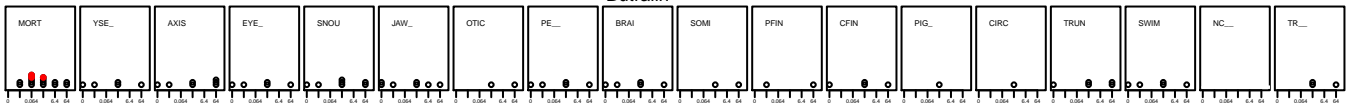

Butyl benzoate

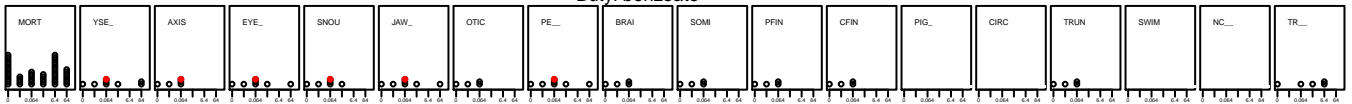

Butyl benzyl phthalate

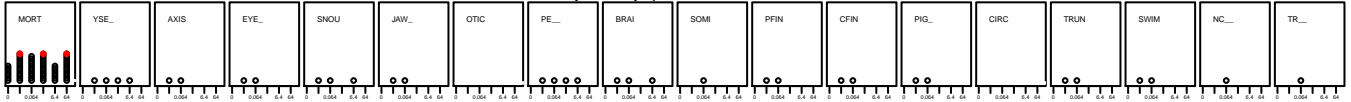

Butylate

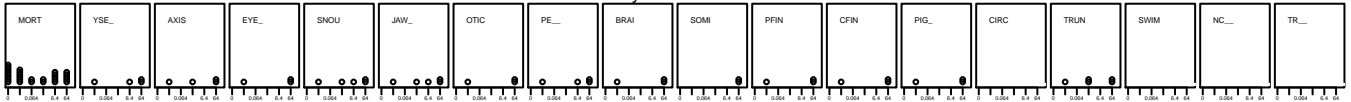

Butylbenzene

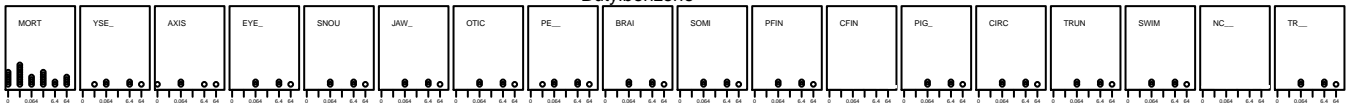

Butylparaben

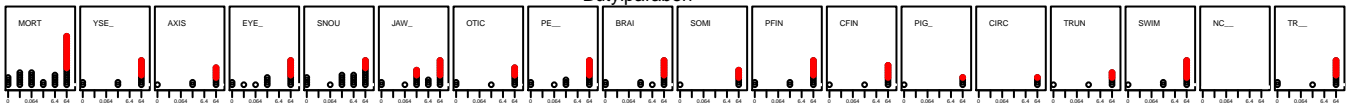

Butyryl trihexyl citrate

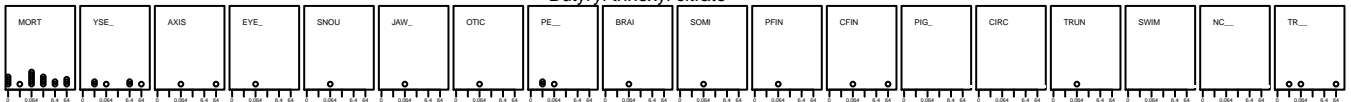

C.I. Solvent yellow 14

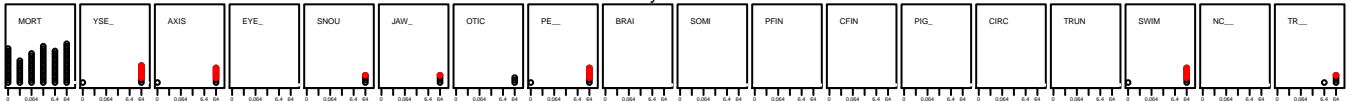

C10-21 sulfonic acids phenyl esters

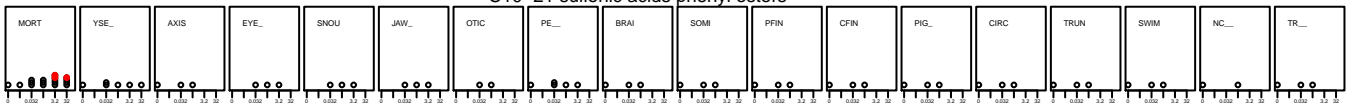

Caffeine

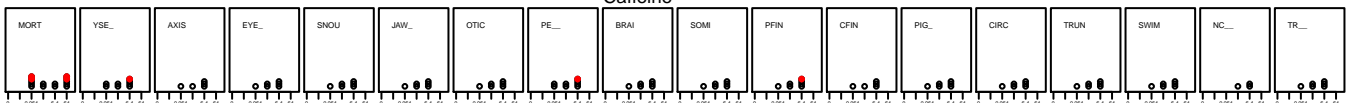

Candoxatril

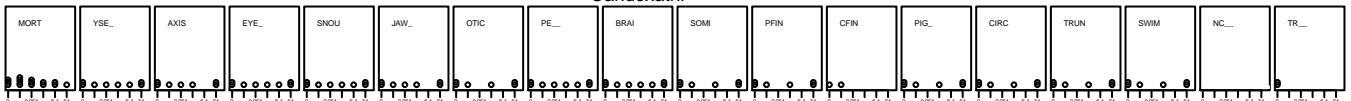

Caprolactam

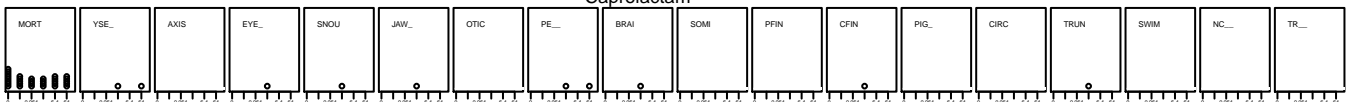

Captafol

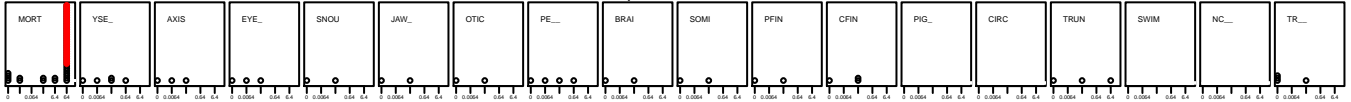

Captan

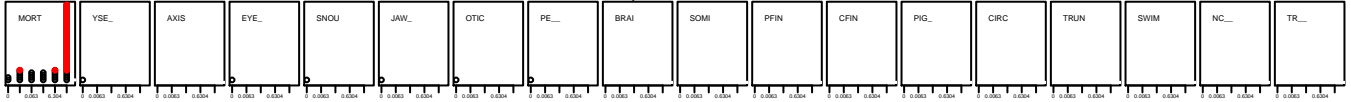

Carabersat

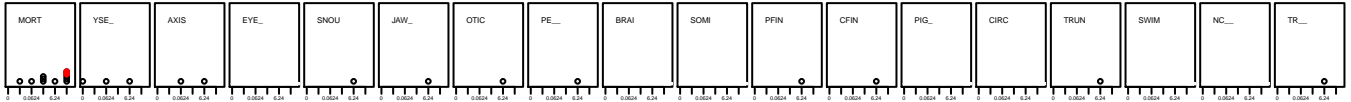

Carbamazepine

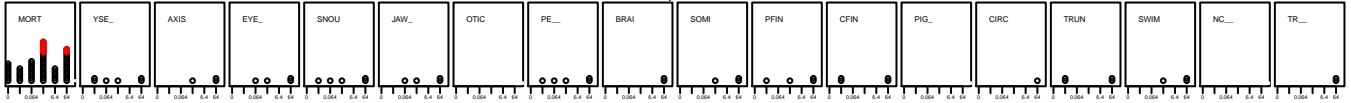

Carbaryl

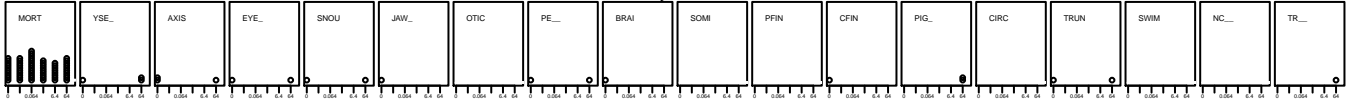

Carbendazim

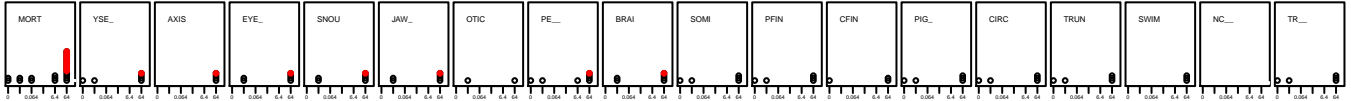

Carbofuran

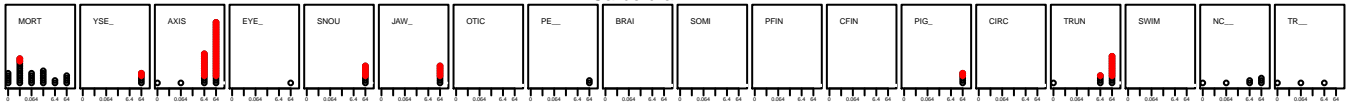

Carbosulfan

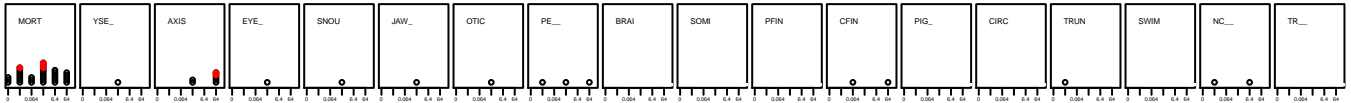

Carboxin

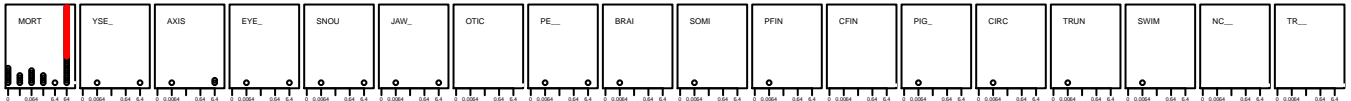

Carfentrazone-ethyl

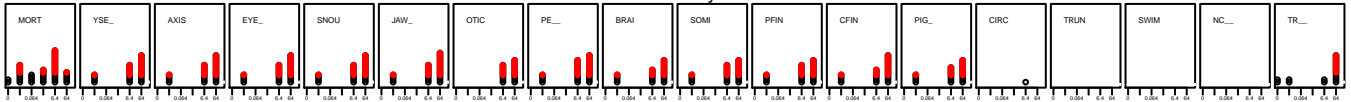



Cariporide mesylate (HOE642)

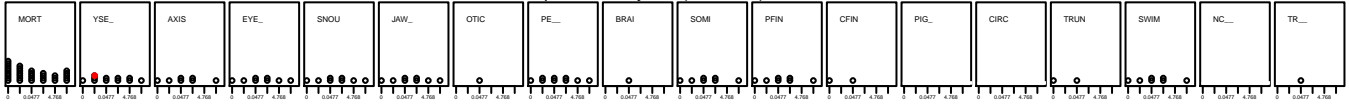

Carminic acid

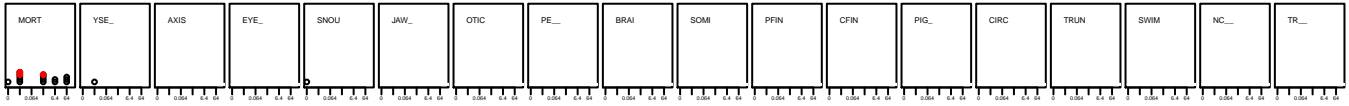

Catechol

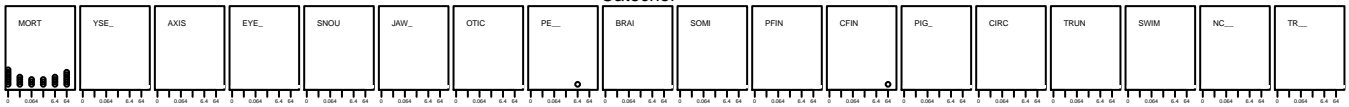

Celecoxib

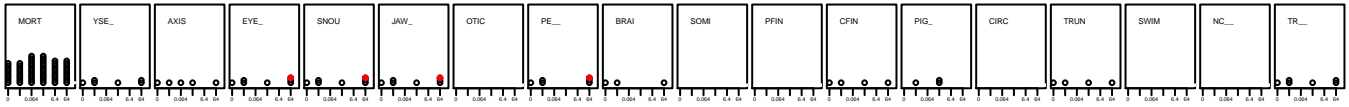

Chloramben

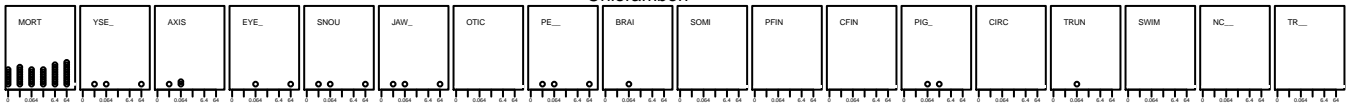

Chlordane

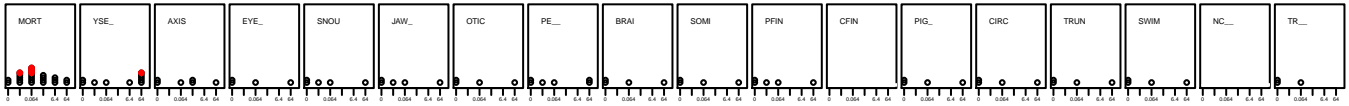

Chlorendic acid

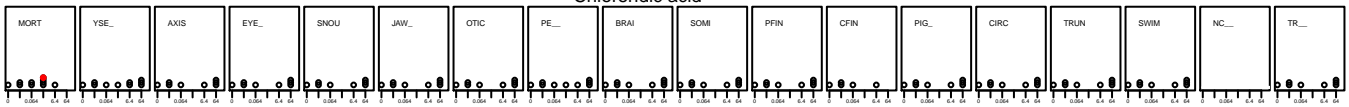

Chlorethoxyfos

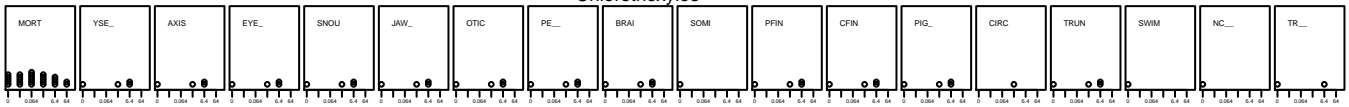

Chloridazon

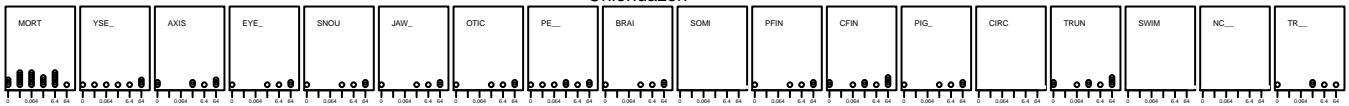

Chlorobenzilate

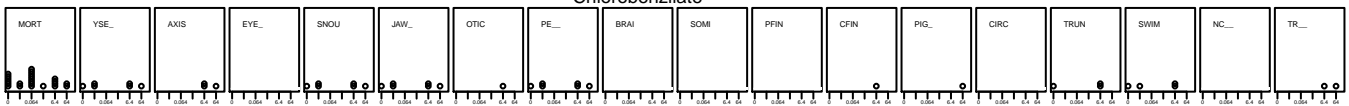

Chloroneb

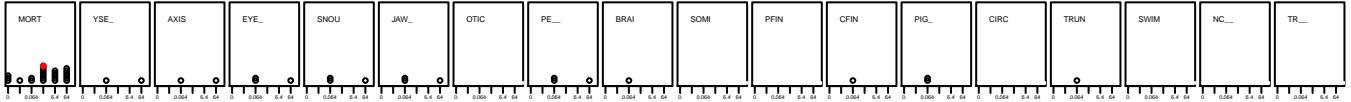

Chlorothalonil

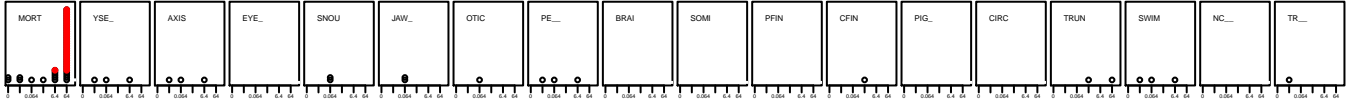

Chlorpromazine hydrochloride

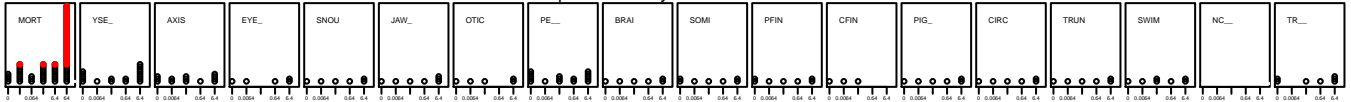

Chlorpropam

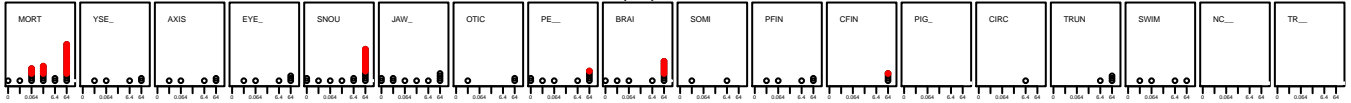

Chlorpyrifos

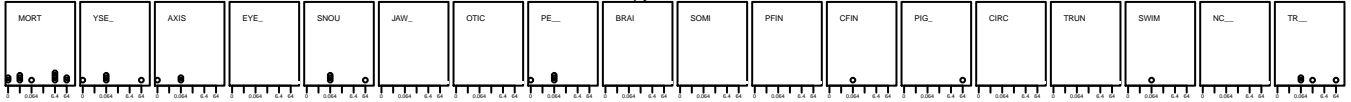

Chlorpyrifos oxon

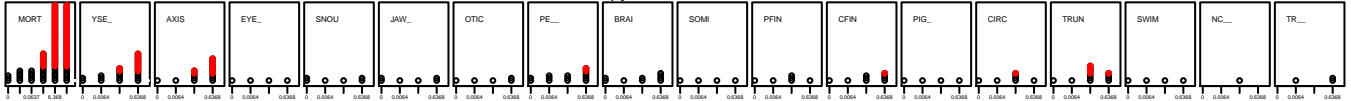

Chlorpyrifos-methyl

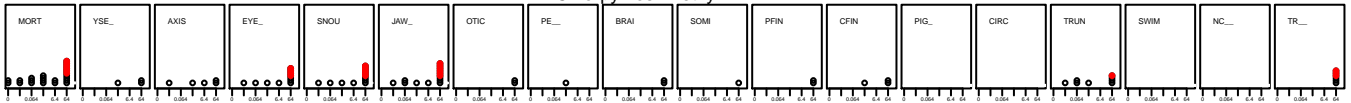

Chlorthal-dimethyl

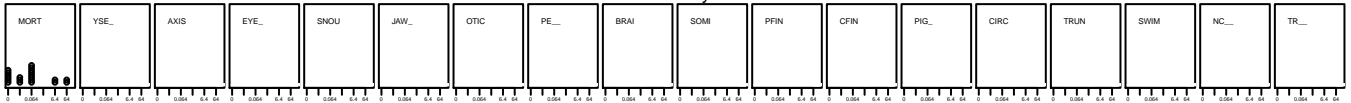

Cinmethylin

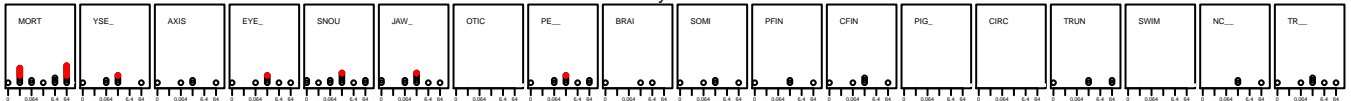

cis-4-cyano-4-(1-cyclohexyl-3-ethyl-1H-indazol-6-yl)cyclohexanecarboxylic acid

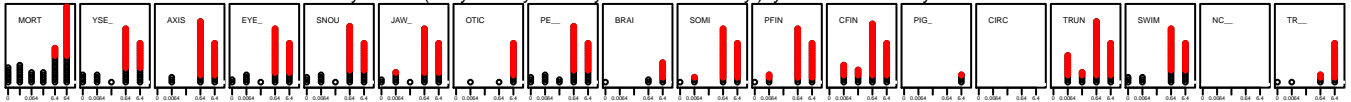

Citric acid

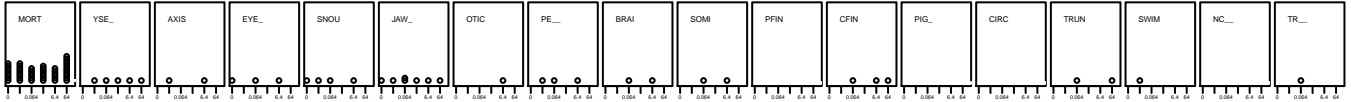

Citronello

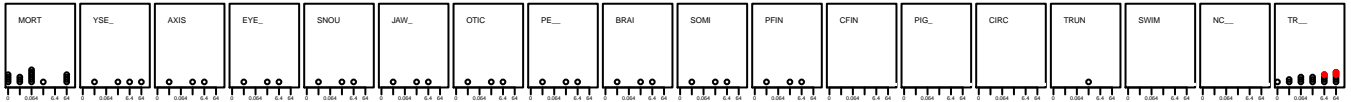

Cladribine

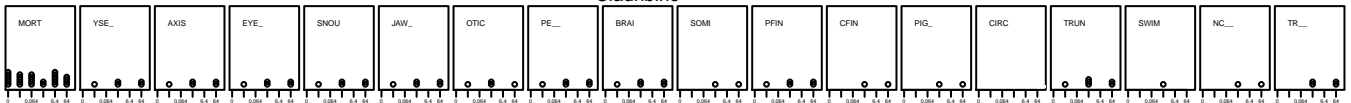

Clodinafop-propargyl

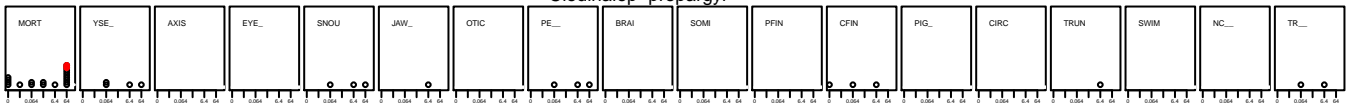

Clofentazine

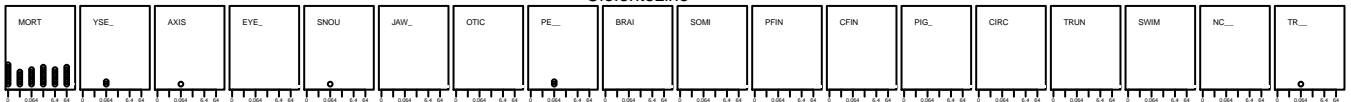

Clofibrate

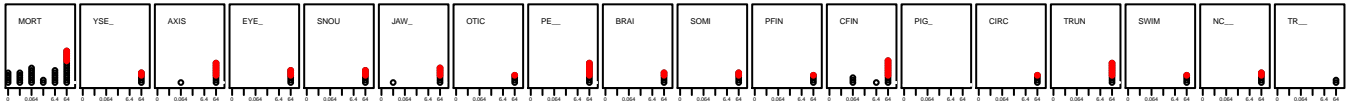

Clomazone

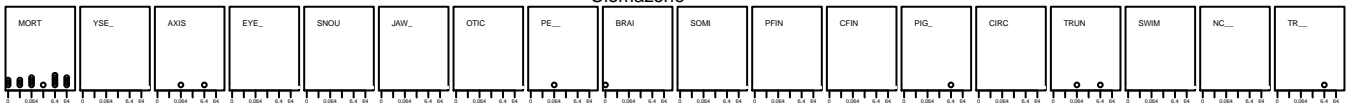

Clomiphene citrate

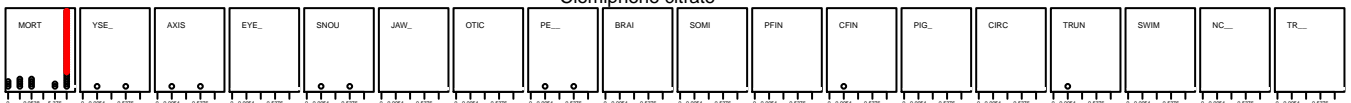

Cloprop

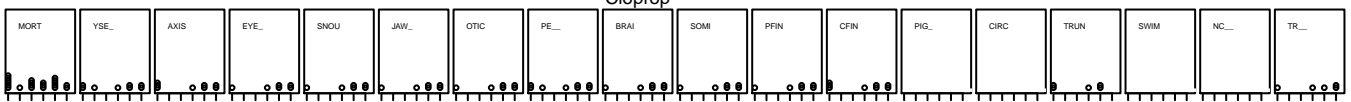

Clopyralid

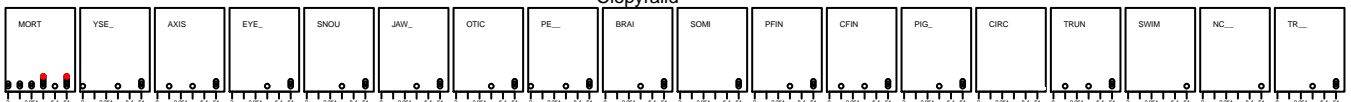





Cyclohexylamine

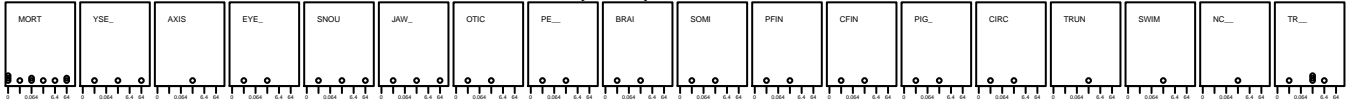

Cyclohexylphenylketone

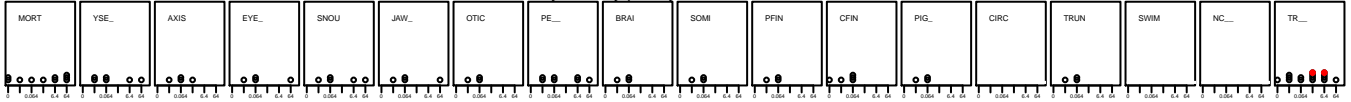

Cyclopamine

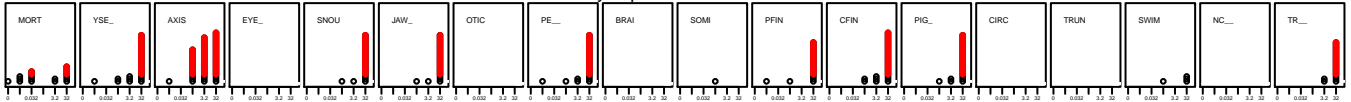

Cyclophosphamide monohydrate

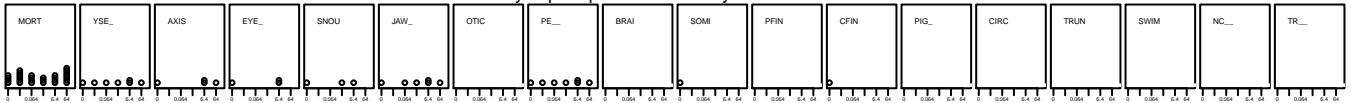

Cyfluthrin

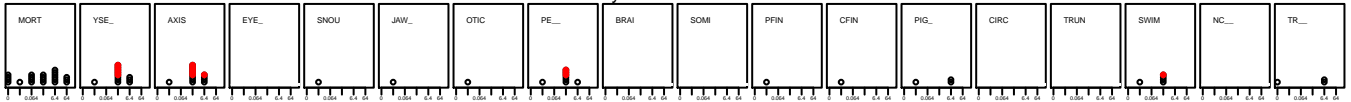

Cyhalop-butyl

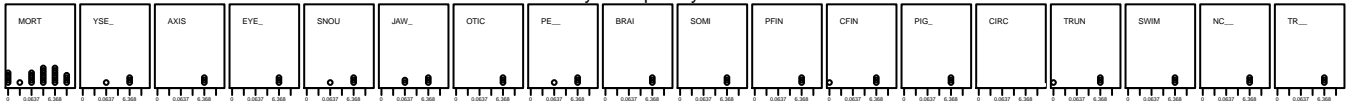

Cymoxanil

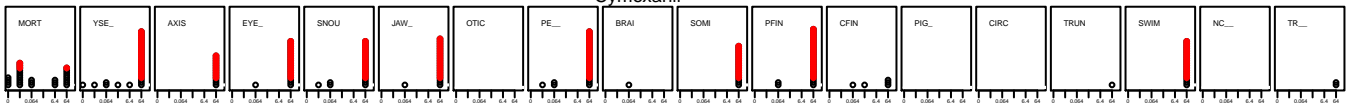

Cypermethrin

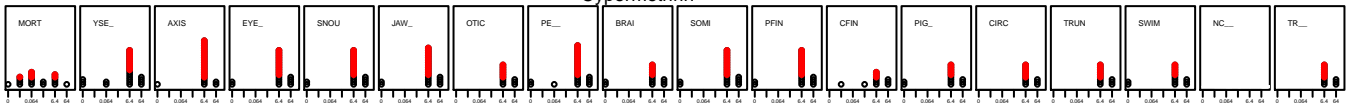

Cyproconazole

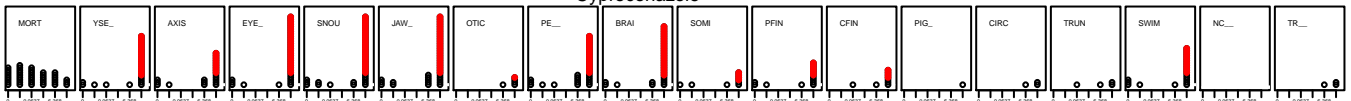

Cyprodinil

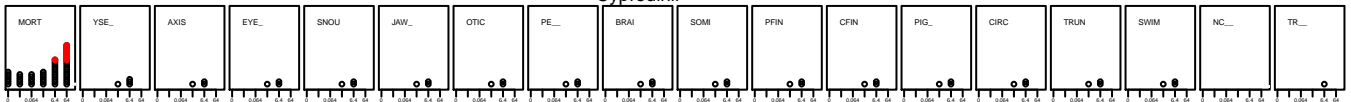

Cyproterone acetate

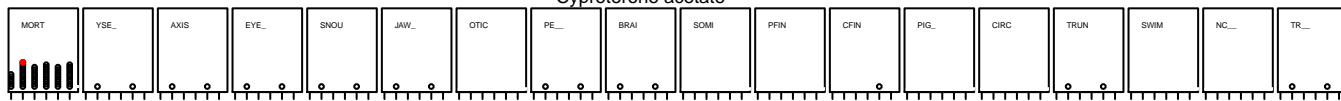

Cyromazine

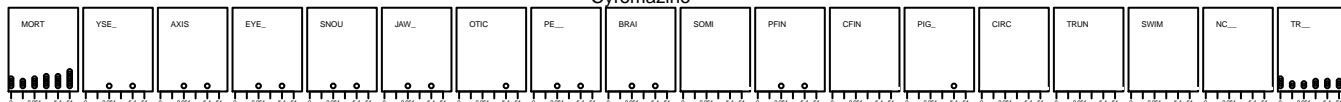

Cytarabine hydrochloride

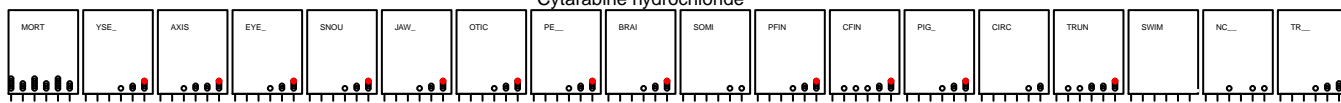

D-Mannitol

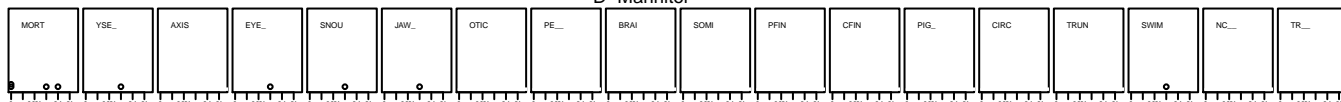

Daidzein

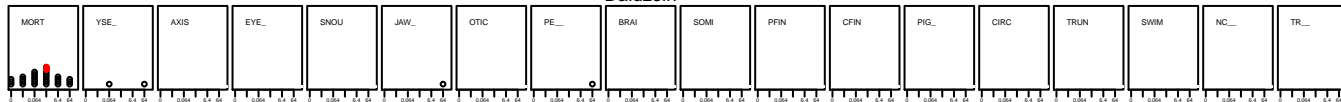

Dalapon

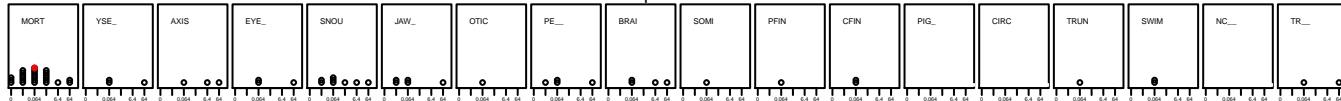

Daminozide

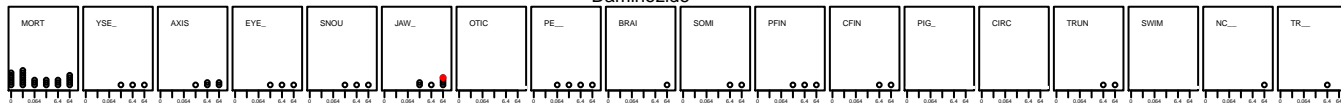

Dapsone

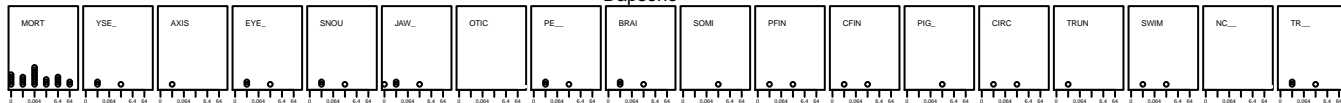

Darbufelone mesylate

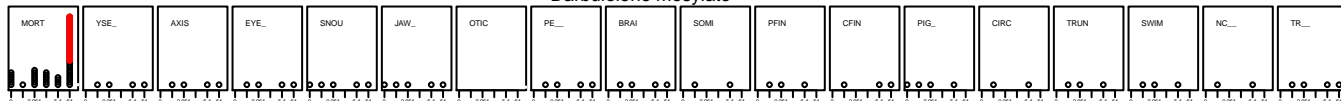

Dazomet

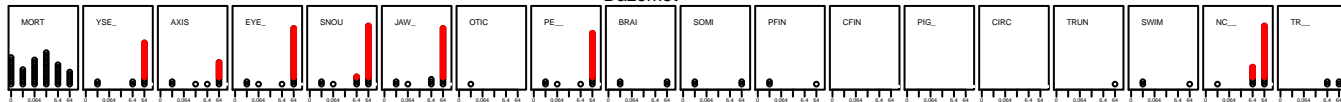

Decane

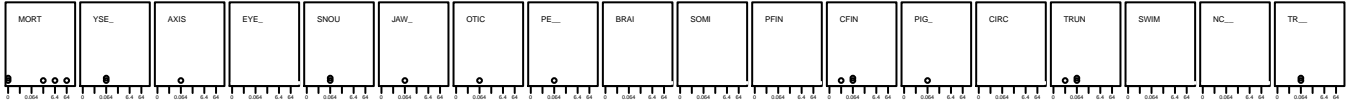

Decanoic acid

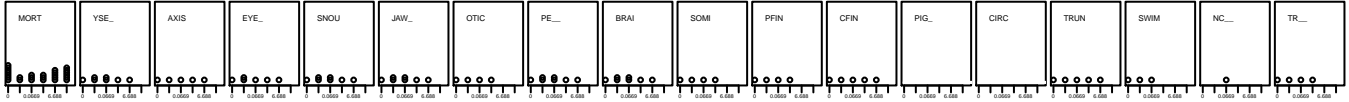

Deisopropylatrazine

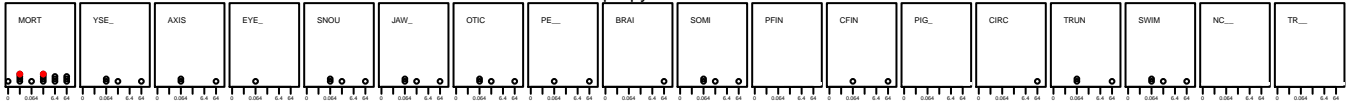

Dexamethasone sodium phosphate

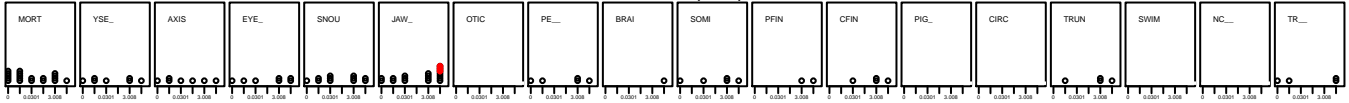

Di-tert-butyl peroxide

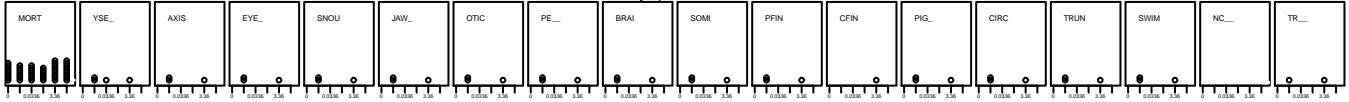

Di(2-ethylhexyl) adipate

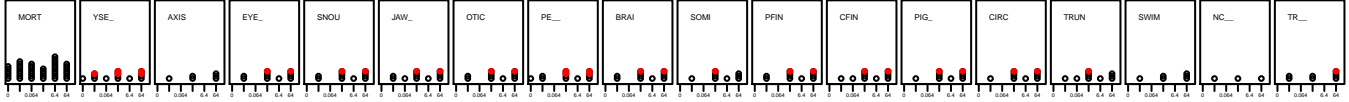

Di(2-ethylhexyl) phthalate

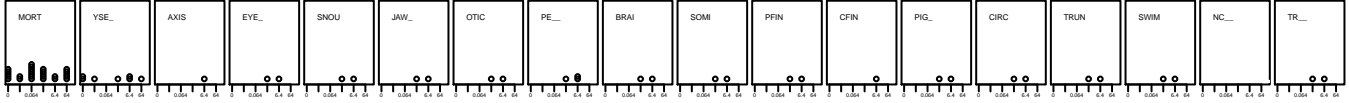

Di(propylene glycol) dibenzoate

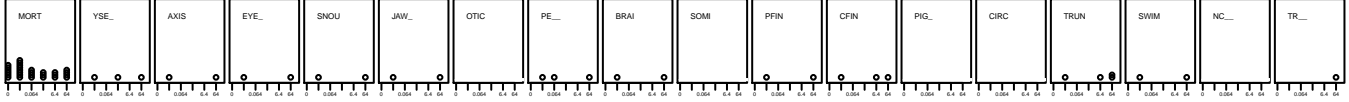

Diacetone alcohol

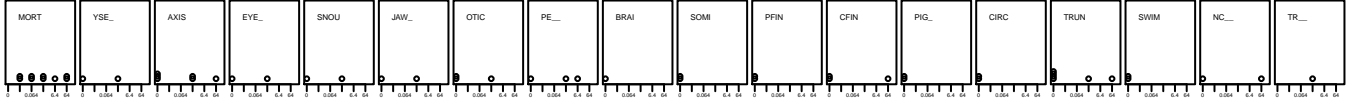

Diallyl phthalate

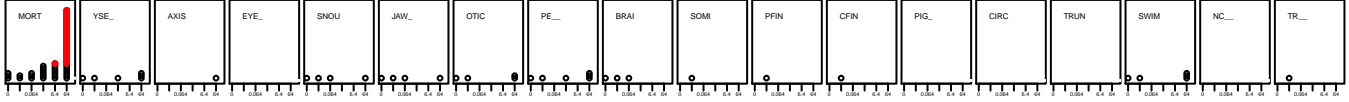



Diazinon

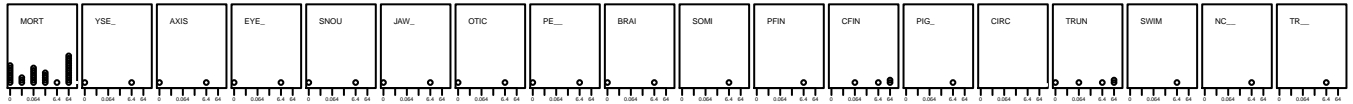

Diazoxon

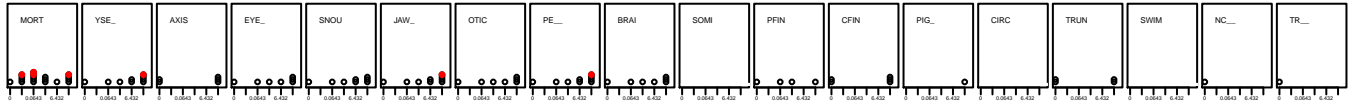

Dibenzofuran

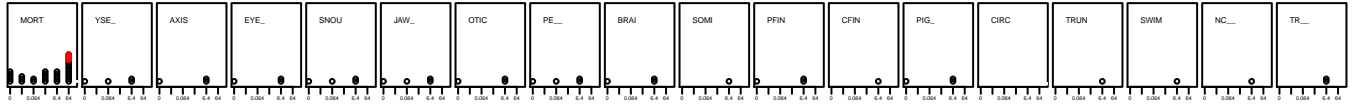

Dibromoacetonitrile

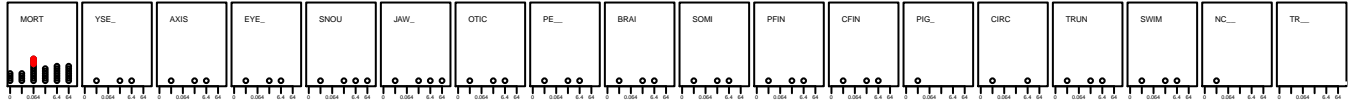

Dibutyl decanedioate

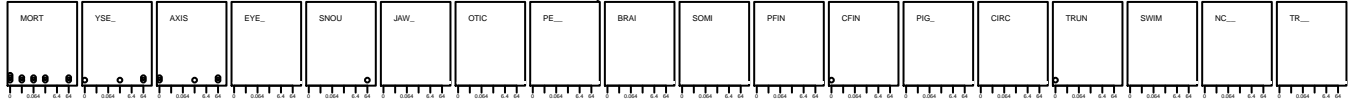

Dibutyl hexanedioate

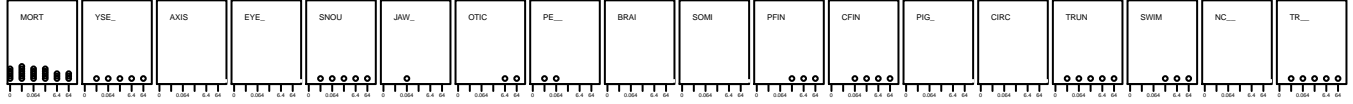

Dibutyl phthalate

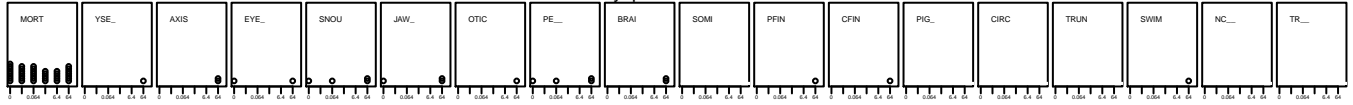

Dicamba

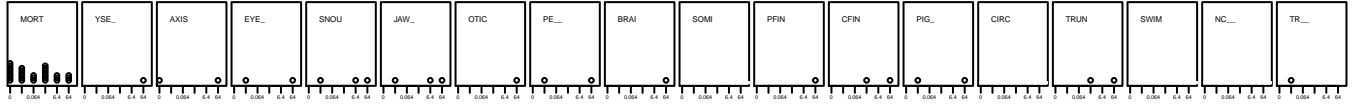

Dichlobenil

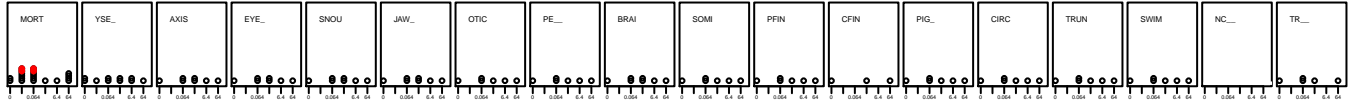

Dichloroacetic acid

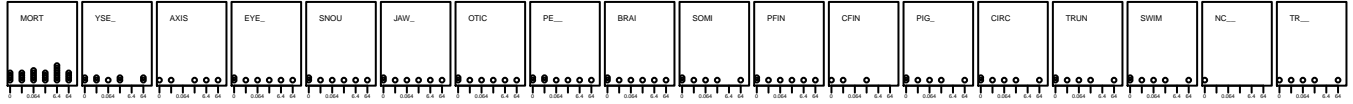

Dichlorprop

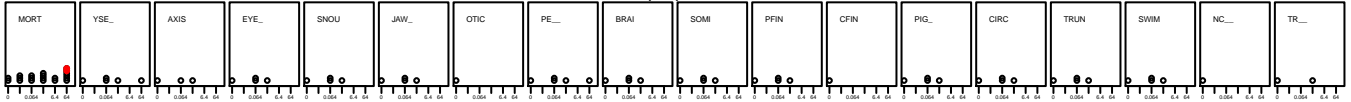

Dichlorvos

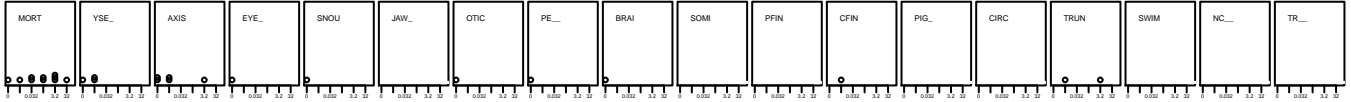

Diclofenac sodium

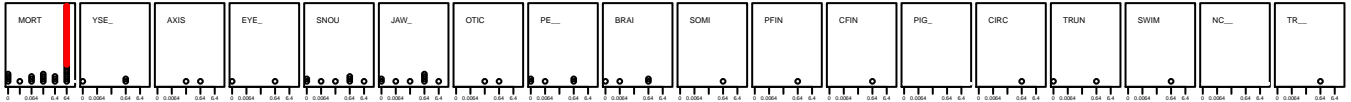

Diclofop-methyl

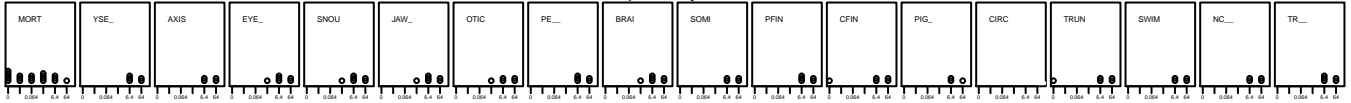

Dicloran

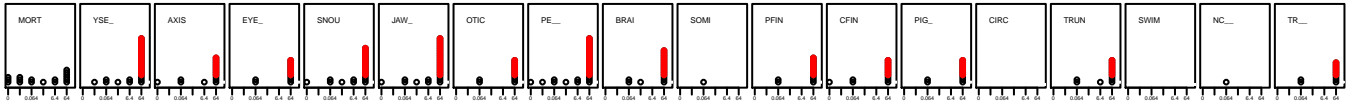

Diclosulam

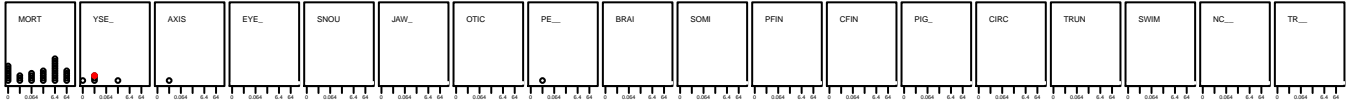

Dicofol

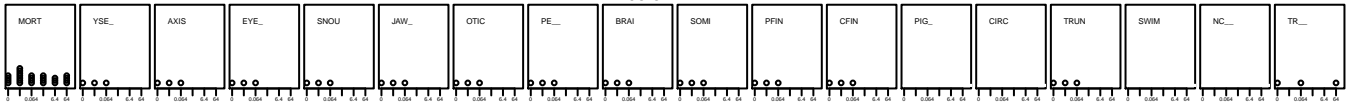

Dictrorpos

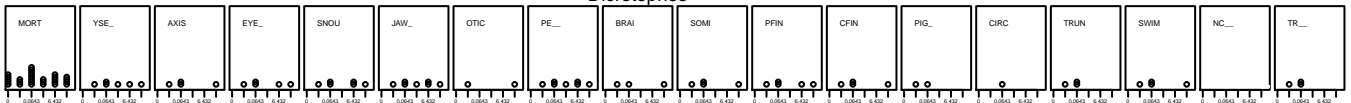

Dicumyl peroxide

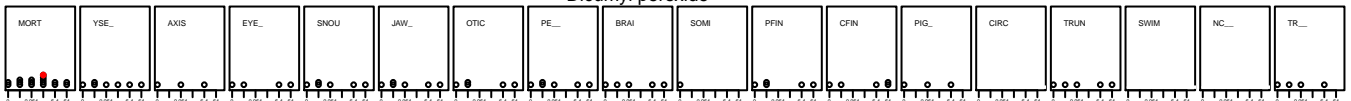

Dicyclohexyl disulfide

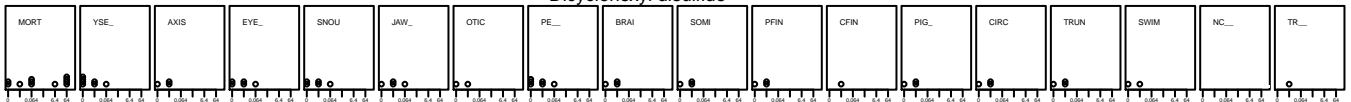

Didecyltrimethylammonium chloride

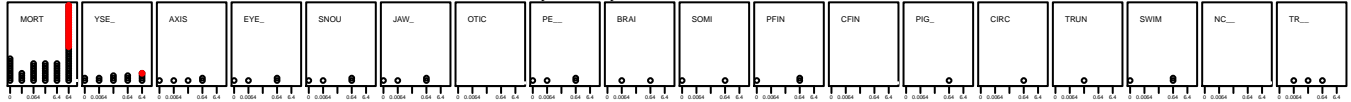

Dieldrin

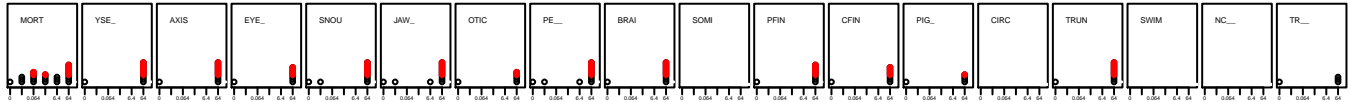

Diethanolamine

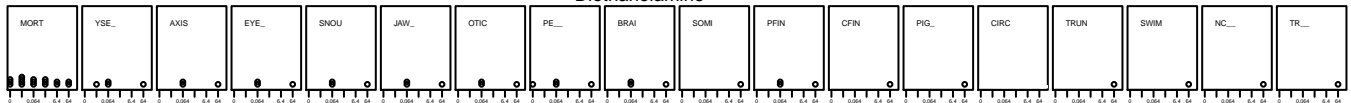

Diethyl butanedioate

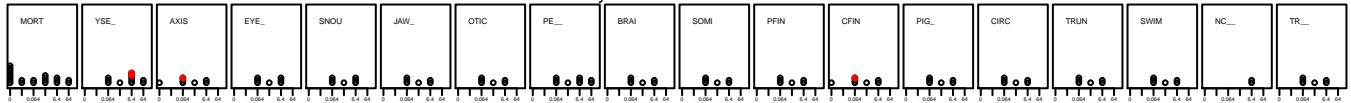

Diethyl phthalate

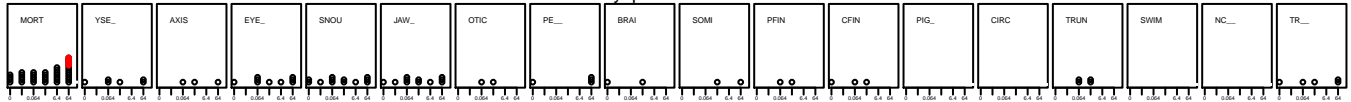

Diethyl sulfate

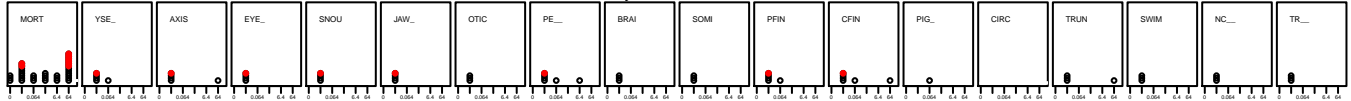

Diethylene glycol

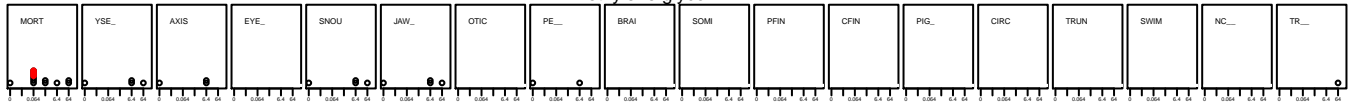

Diethylene glycol dibenzoate

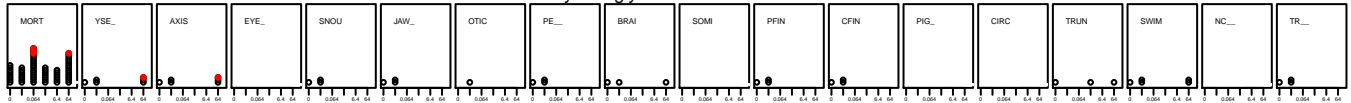

Diethylene glycol monomethyl ether

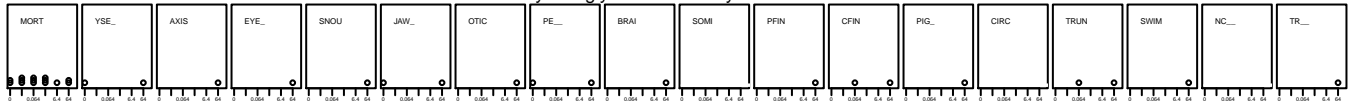

Diethylstilbestrol

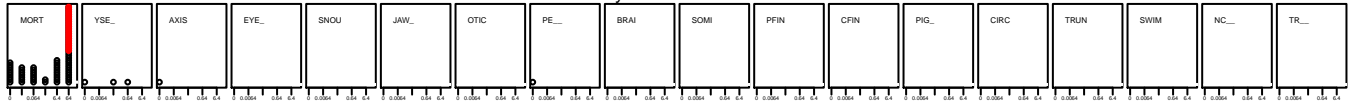

Difenoconazole

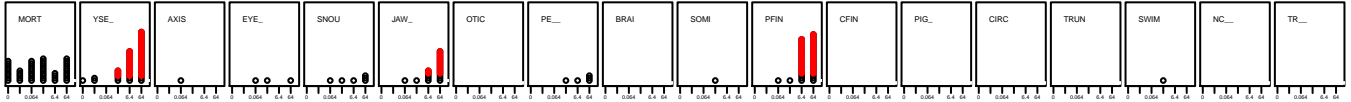

Difenzoat metilsulfate

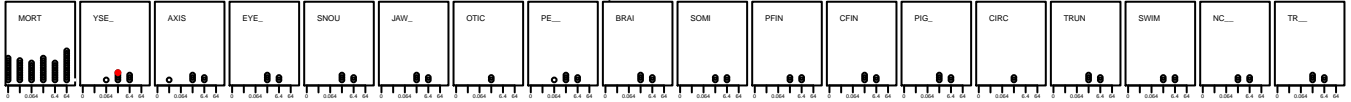

Dihexyl phthalate

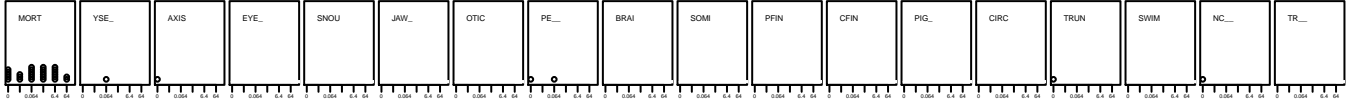

Diisobutyl adipate

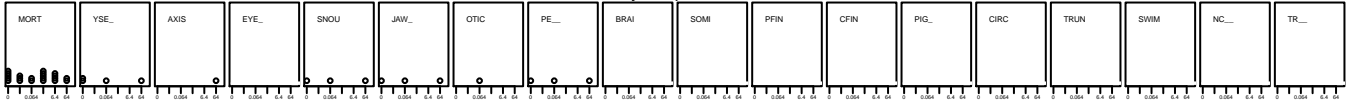

Diisobutyl phthalate

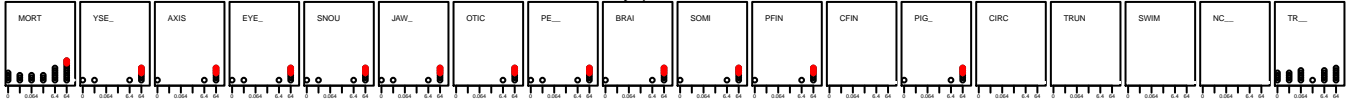

Diisodecyl hexanedioate

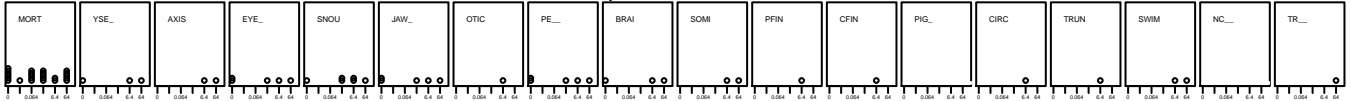

Diisononyl cyclohexane-12-dicarboxylate

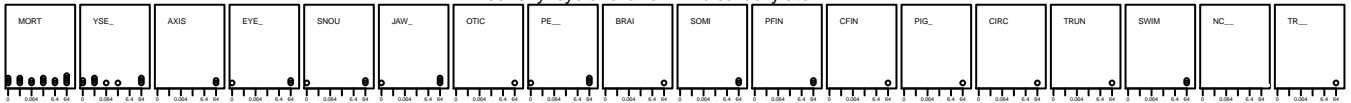

Diisopropyl methylphosphonate

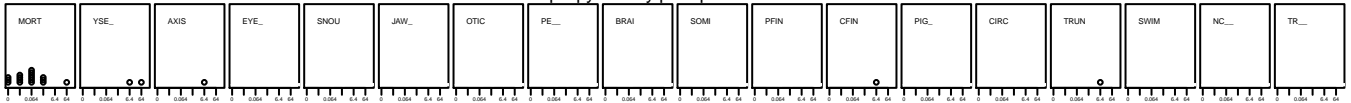

Dimethenamid

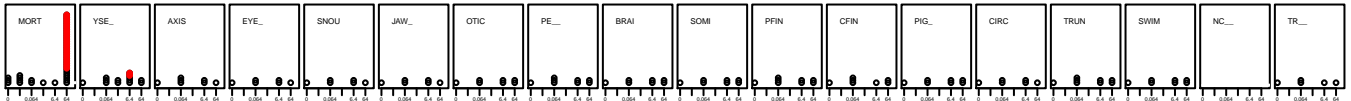

Dimethipin

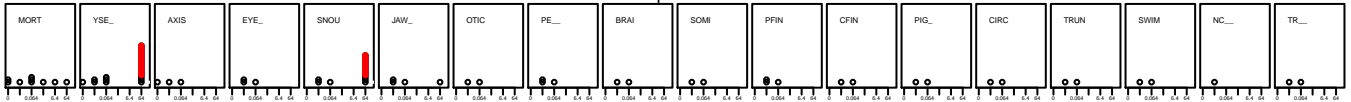

Dimethoate

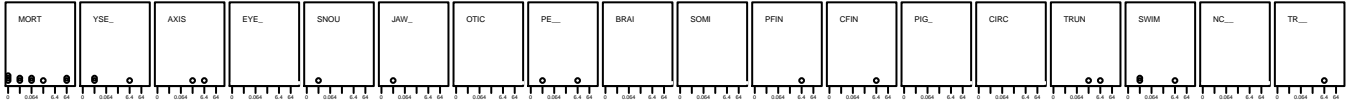

Dimethomorph

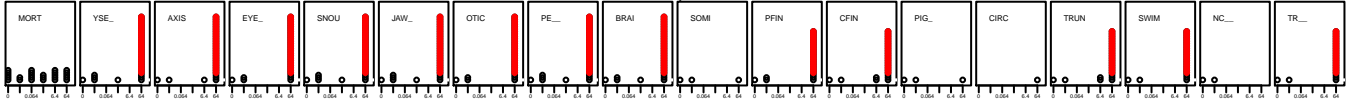

Dimethoxane

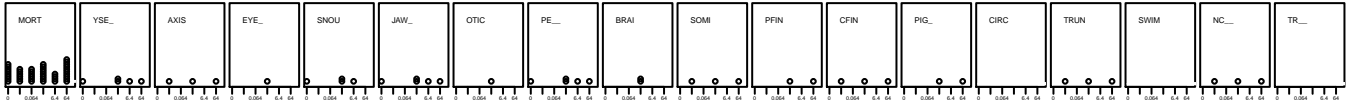

Dimethyl adipate

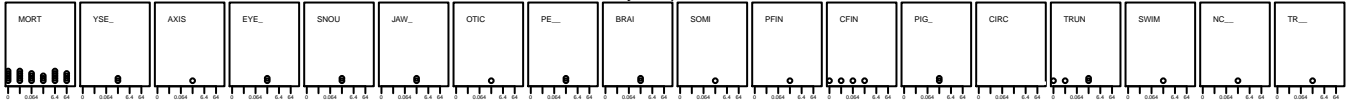

Dimethyl glutarate

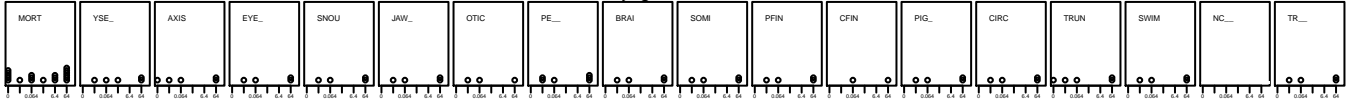

Dimethyl malonate

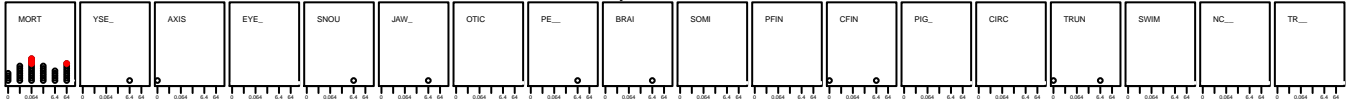

Dimethyl phthalate

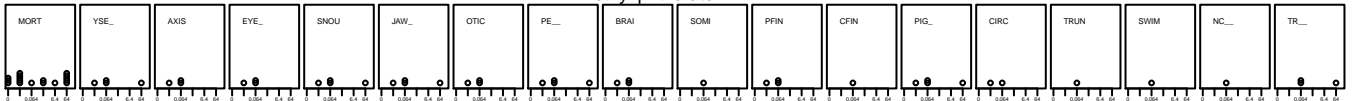

Dimethyl succinate

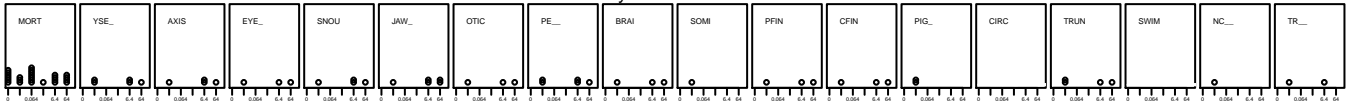

Dimethyl sulfate

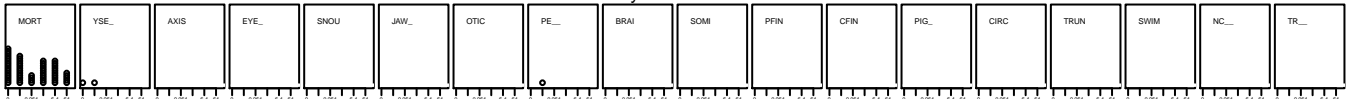

Dimethyl terephthalate

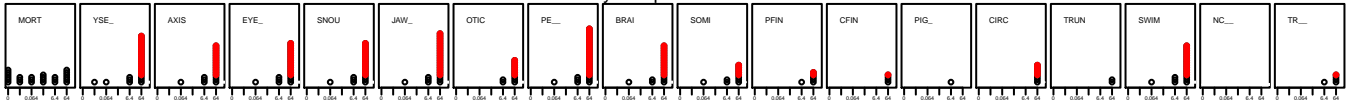

Dimethylaminoethanol

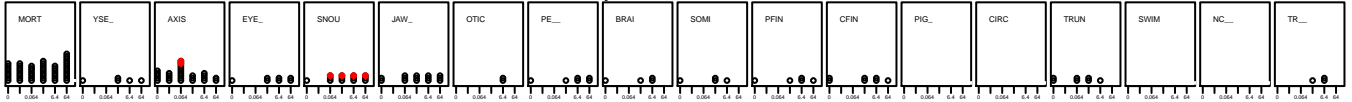

Dimethylarsinic acid

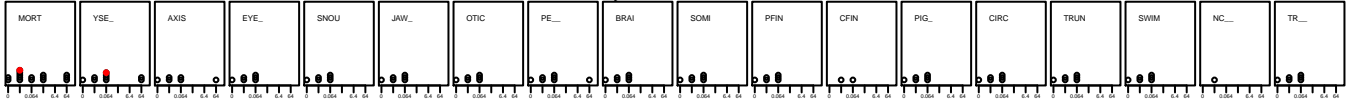

Dimethylcarbamoyl chloride

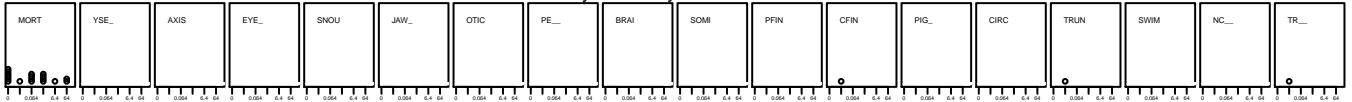

Diniconazole

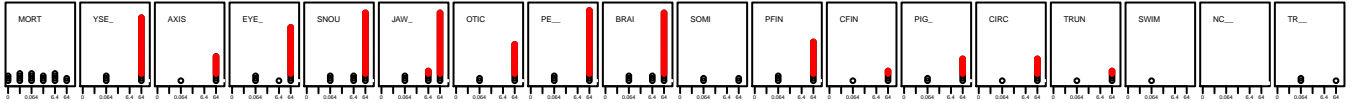

Dinoseb

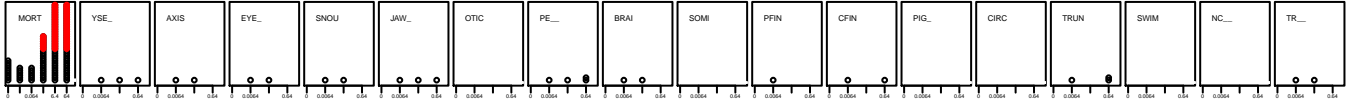

Diethyl phthalate

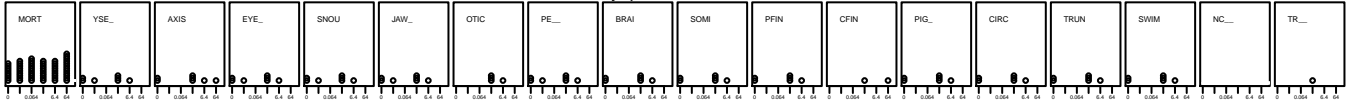

Diethyl succinate

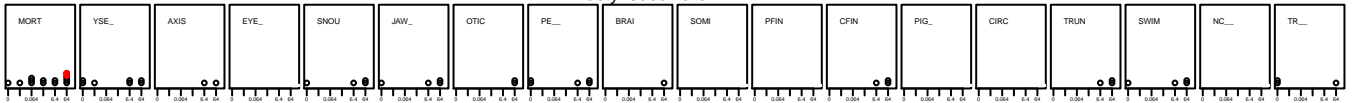

Dipentyl phthalate

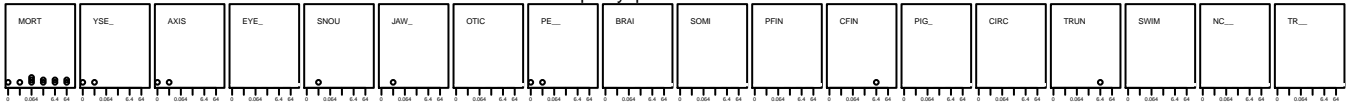

Diphenhydramine hydrochloride

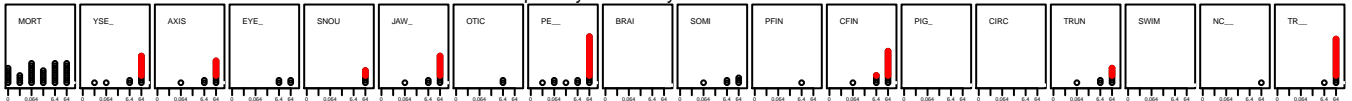

Diphenyl isophthalate

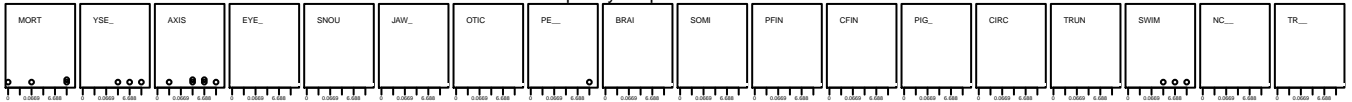

Diphenylamine

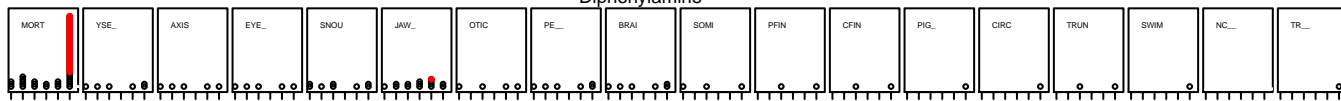

Dipropyl pyridine-25-dicarboxylate

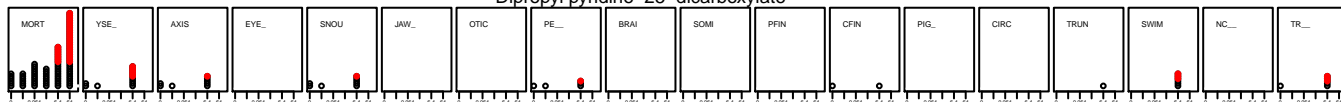

Dipropylene glycol

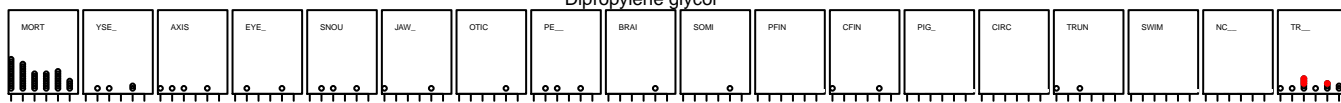

Diquat dibromide monohydrate

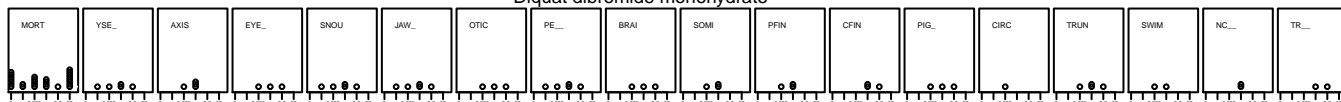

ium (5S6R7R)-5-(13-benzodioxol-5-yl)-2-butyl-7-(2-[(2S)-2-carboxylatopropyl]-4-methoxyphenyl)-67-dihydro-5H-cyclopenta[b]pyridine-6-carboxylate

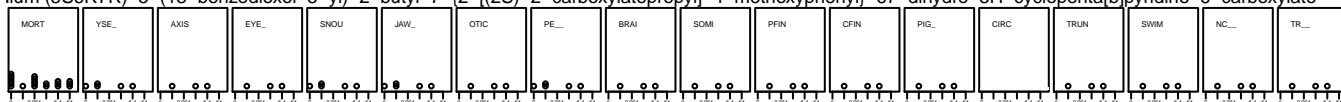

Disulfiram

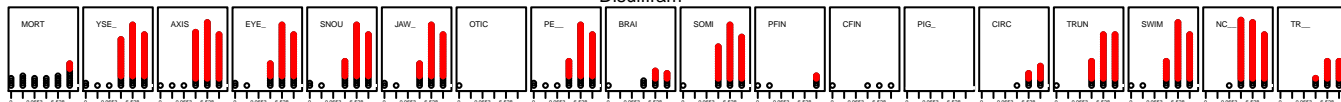

Disulfoton

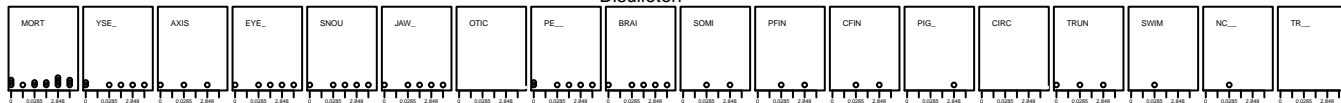

Dithiopyr

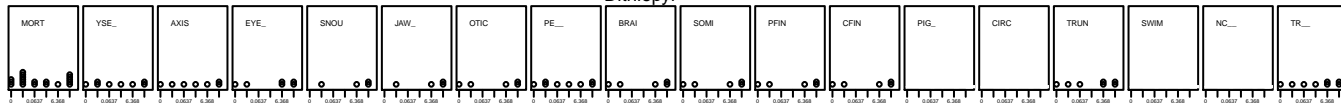

Diuron

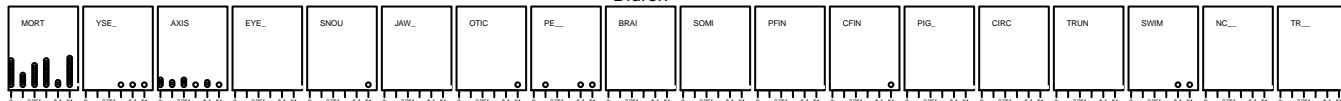

Docusate sodium

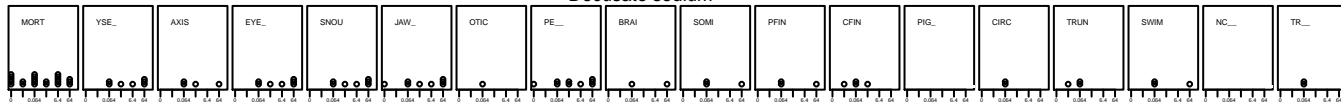

Dodecylbenzene

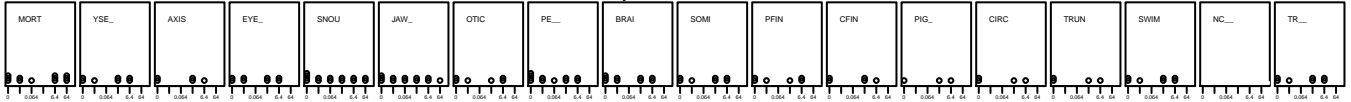

Dodecylbenzene sulfonate triethanolamine (1:1)

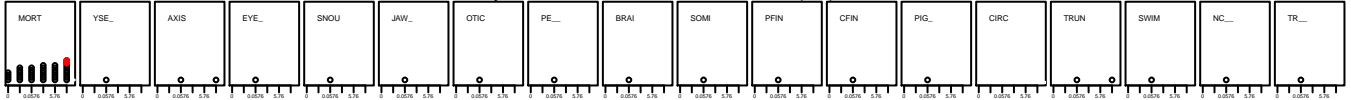

Dodecylbenzenesulfonic acid

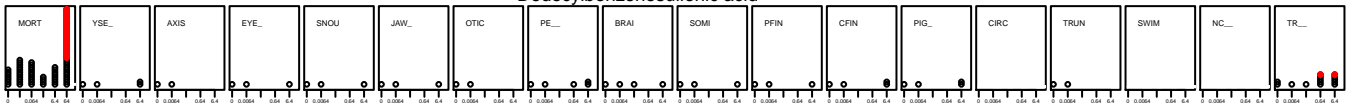

Dodecyltrimethylammonium chloride

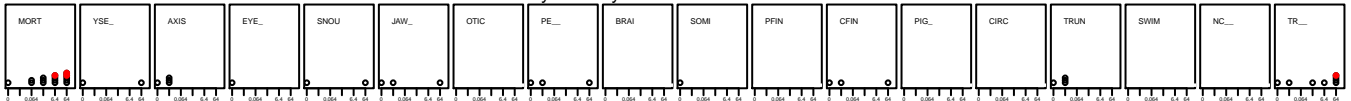

Elzasonan

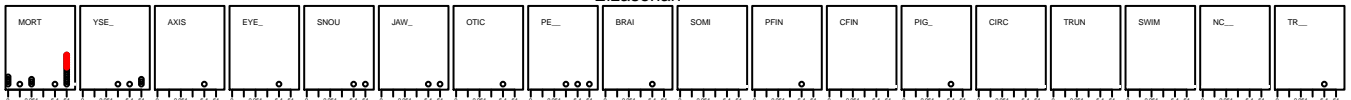

Emamectin benzoate

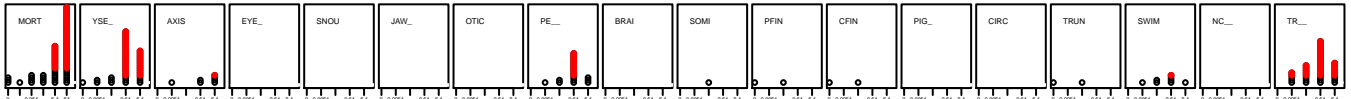

Endosulfan

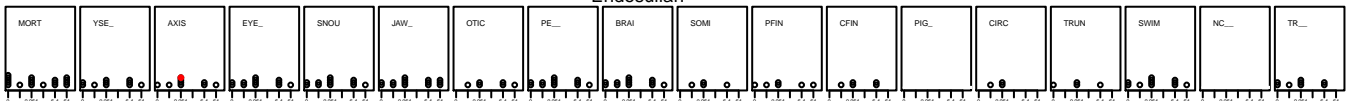

Endothal

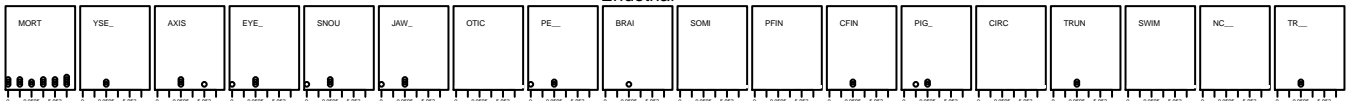

Endrin

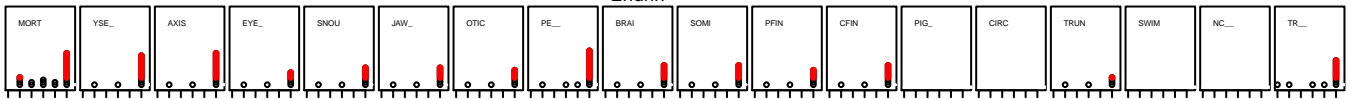

Erythromycin

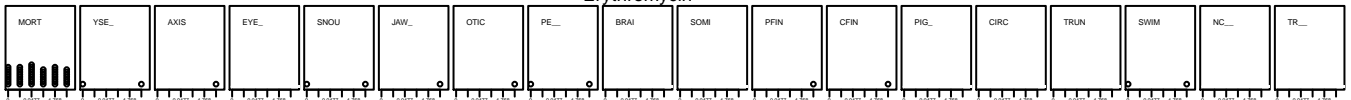



Esfenvalerate

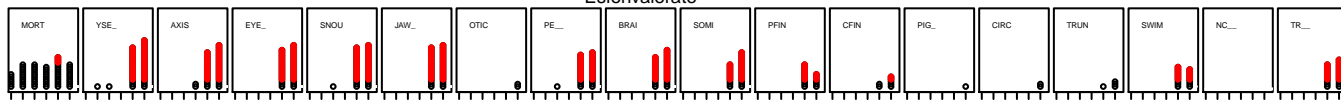

Estrone

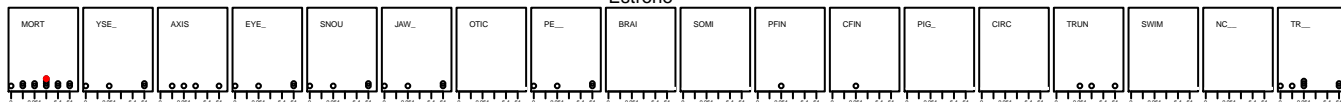

Ethalfurain

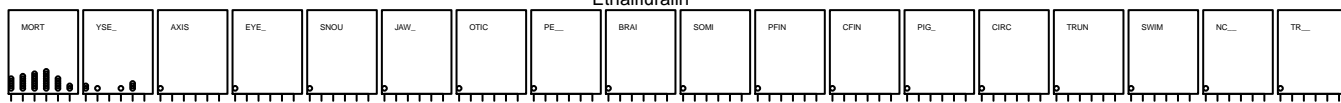

Ethanolamine

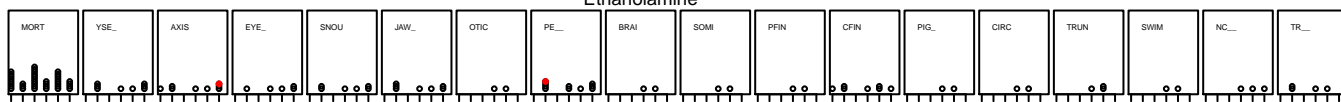

Ethephon

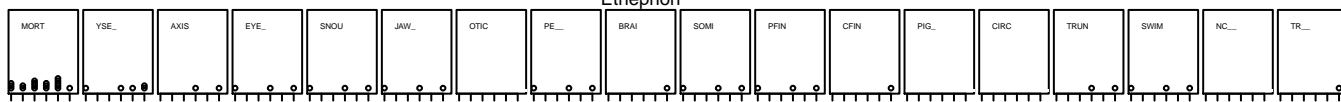

Ethion

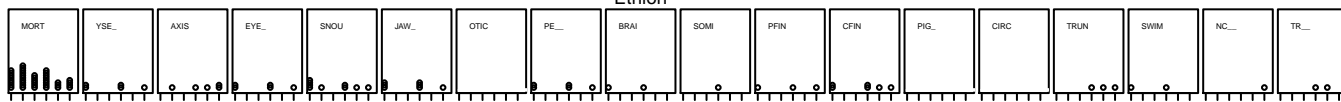

Ethofumesate

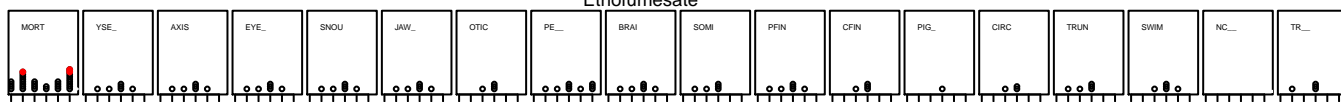

Ethoprop

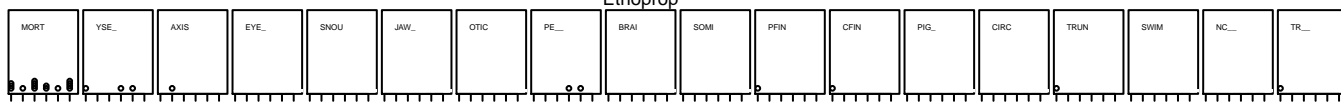

Ethoxyquin

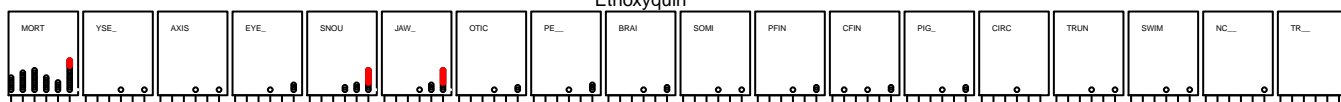

ethyl (2R3S)-3-amino-2-phenyl-23-dihydro-1-benzofuran-2-carboxylate

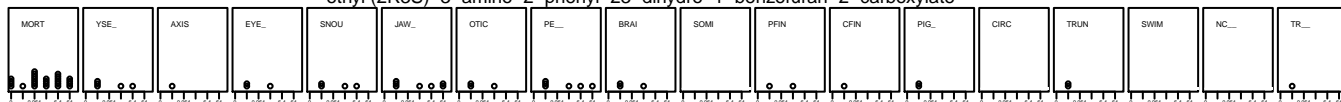

ethyl ((7-((2-(3-chlorophenyl)-2-hydroxyethyl)amino)-5,6,7,8-tetrahydronaphthalen-2-yl)oxy)acetate hydrochloride

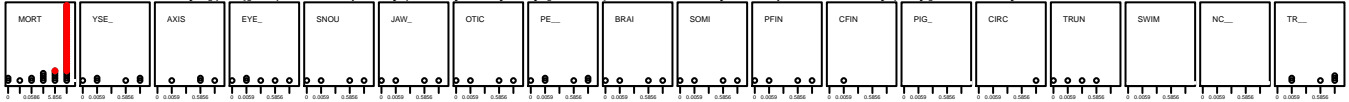

ethyl 4-(4-(((2S)-2-hydroxy-3-(4-hydroxy-3-((methylsulfonyl)amino)phenoxy)propyl)amino)cyclohexyl)benzoate hydrochloride

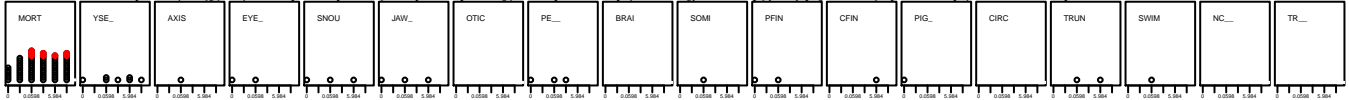

Ethyl butyrate

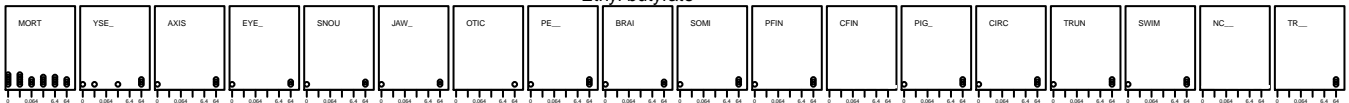

Ethyl heptanoate

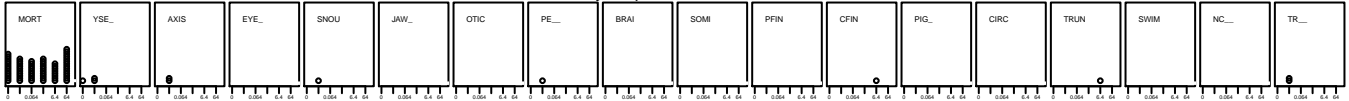

Ethylene glycol

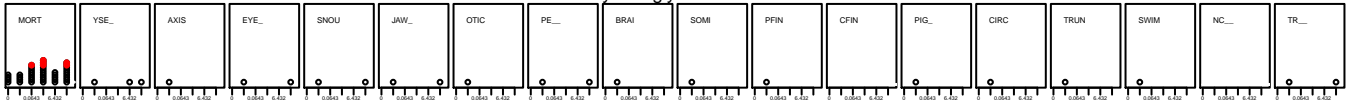

Ethylene thiourea

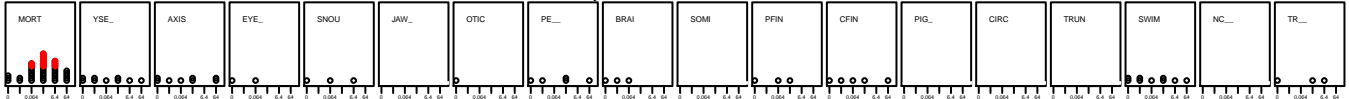

Ethylparaben

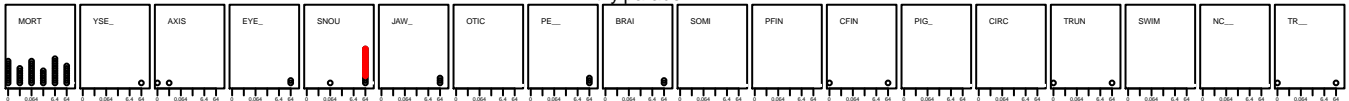

Etofenprox

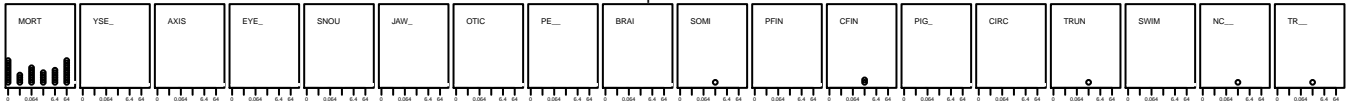

Etoxazole

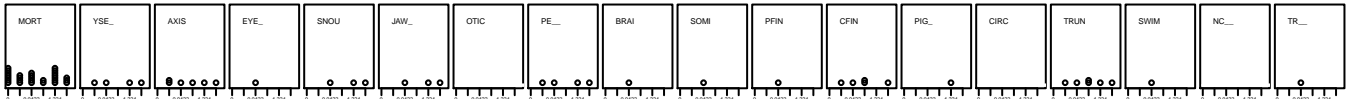

Etridiazole

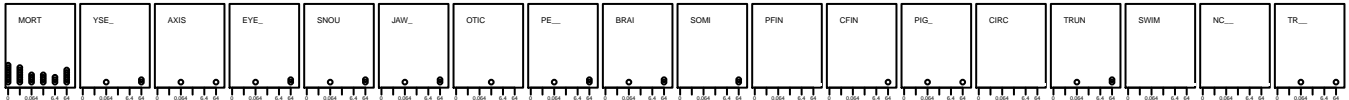



Fenamiphos

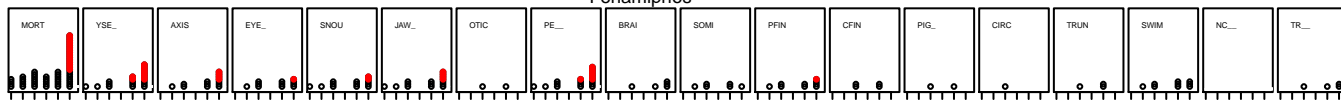

Fenarimol

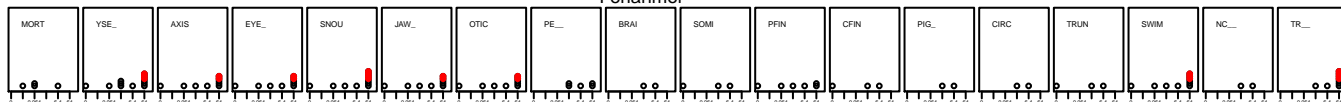

Fenbuconazole

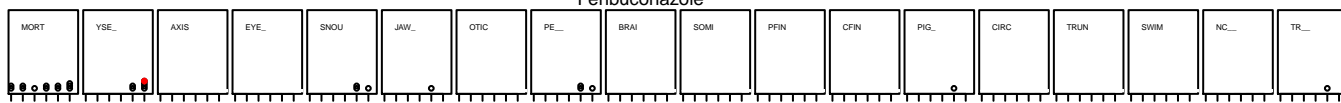

Fenhexamid

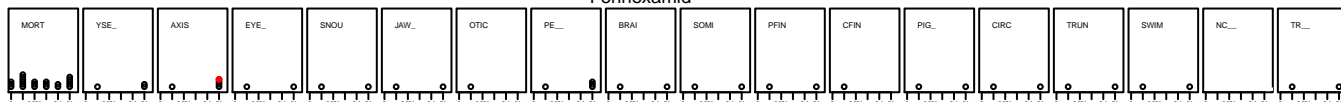

Fenitrothion

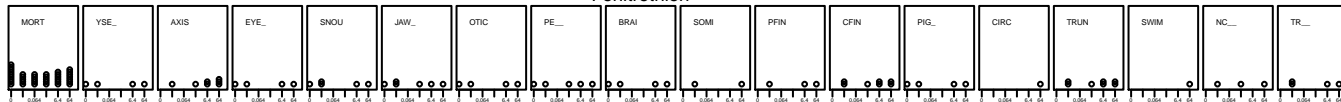

Fenofibrate

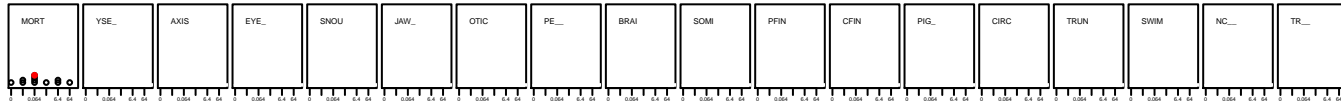

Fenoxaprop-ethyl

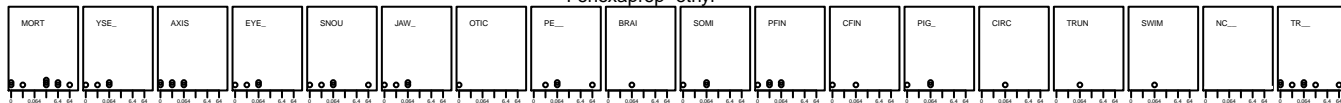

Fenoxycarb

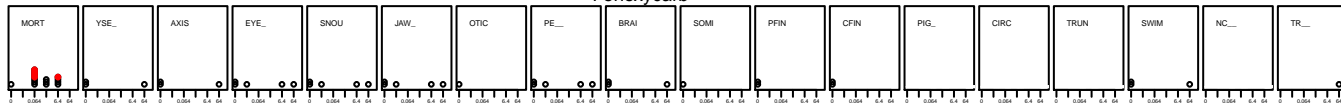

Fenpropathrin

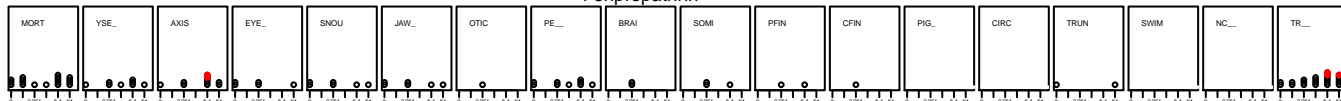

Fenpyroximate (ZE)

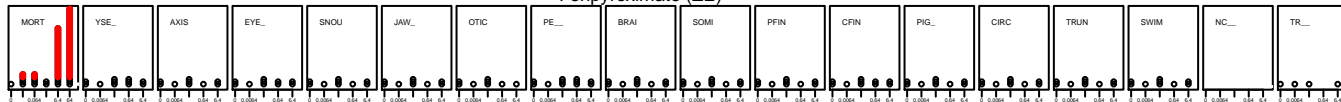



Flumetsulam

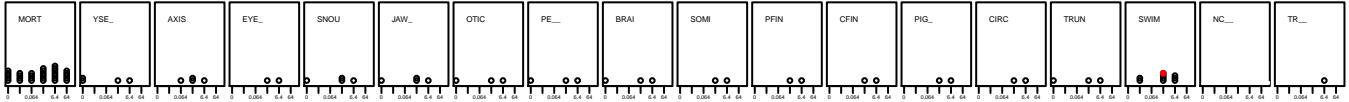

Flumiclorac-pentyl

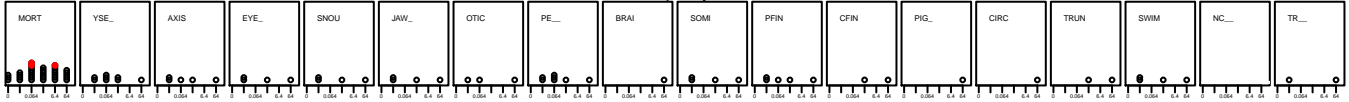

Flumioxazin

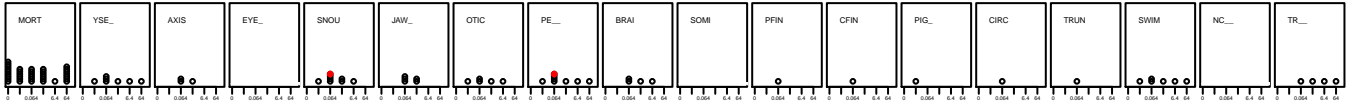

Fluometuron

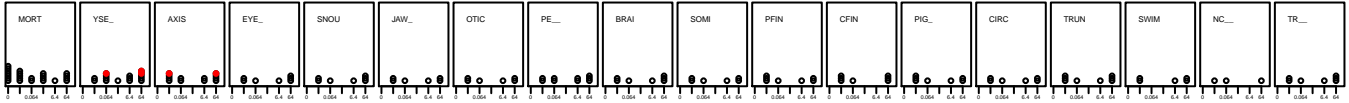

Fluoranthene

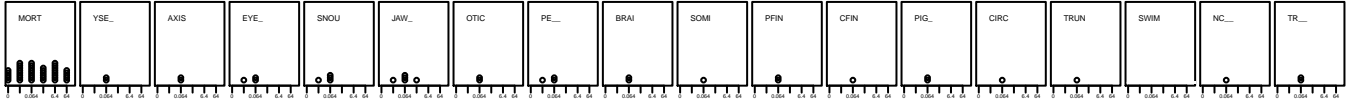

Fluorene

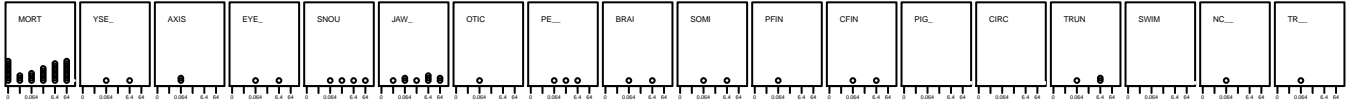

Fluoxastrobin

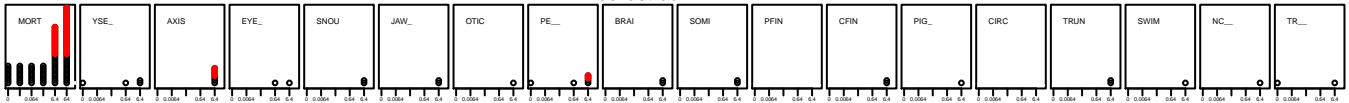

Fluridone

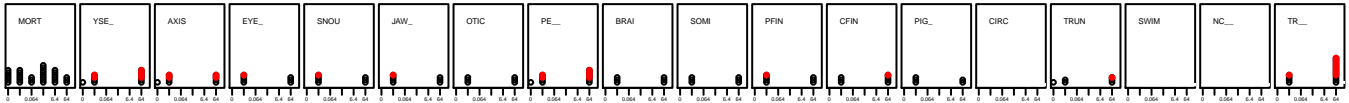

Fluroxypyr

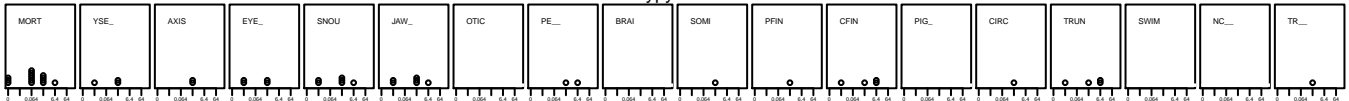

Fluroxypyr-meptyl

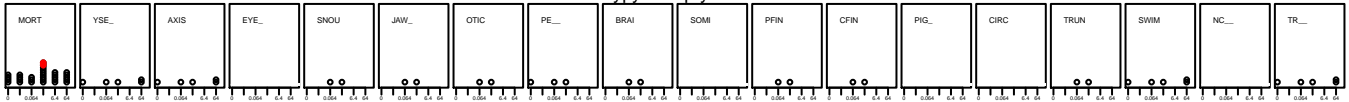

Flusilazole

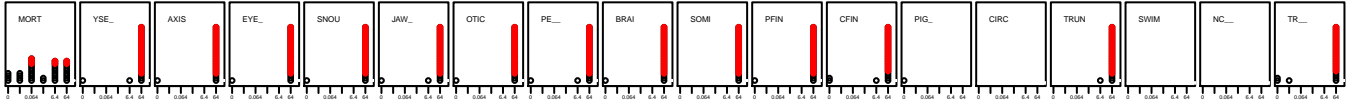

Flutamide

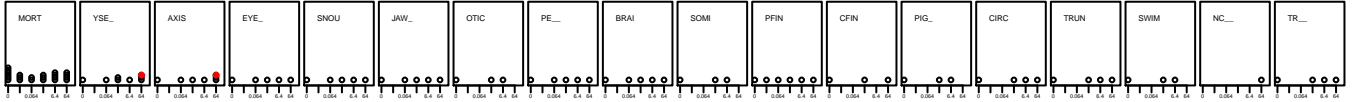

Fluthiacet-methyl

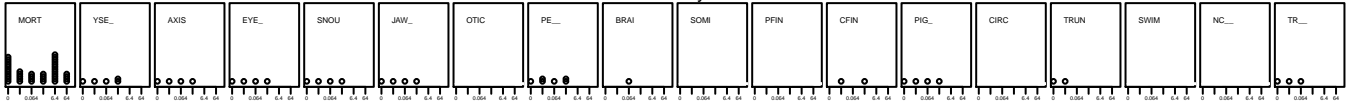

Flutolanil

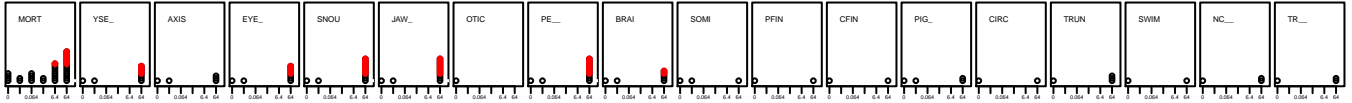

Folic acid

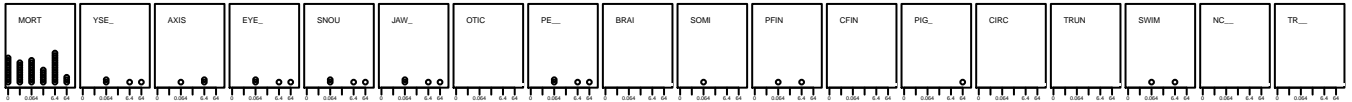

Folpet

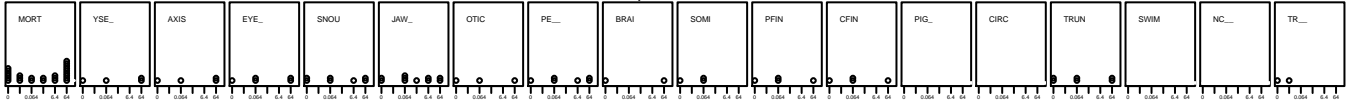

Fomesafen

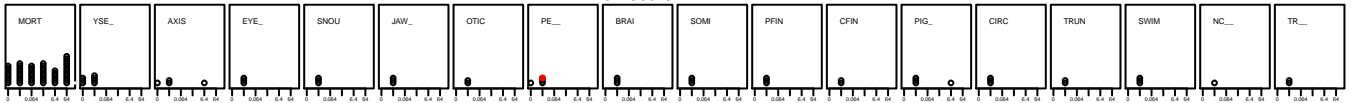

Forchlorfenuron

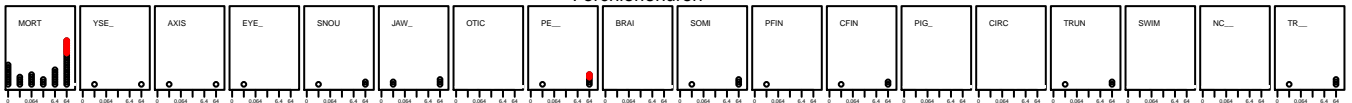

Formamide

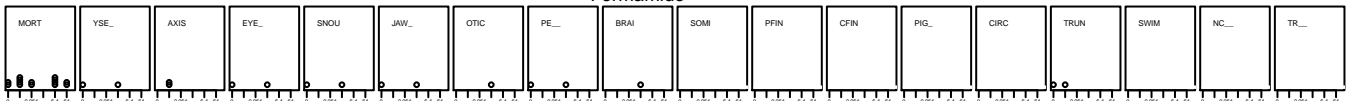

Formetanate hydrochloride

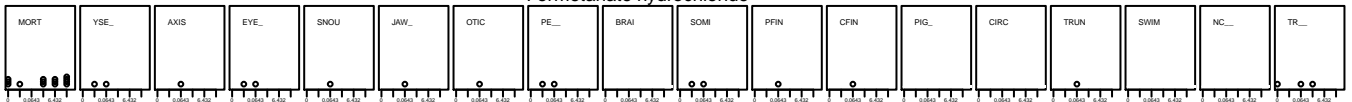

Fosthiazate

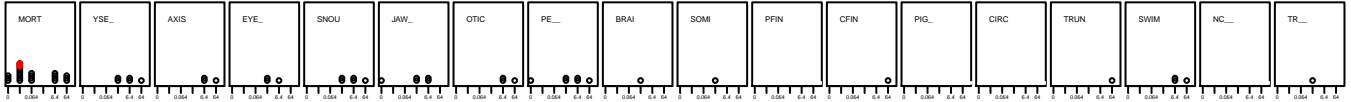

Fully acetylated glycerol monoester on 12-Hydroxystearic acid (85 percent); Fully acetylated glycerol monostearate represents (10 percent)

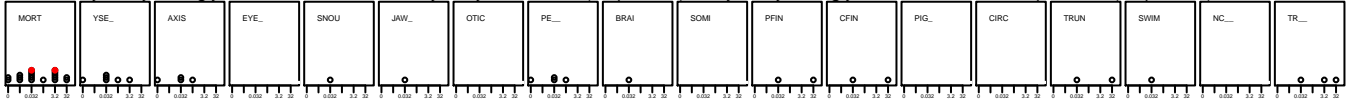

Fulvestrant

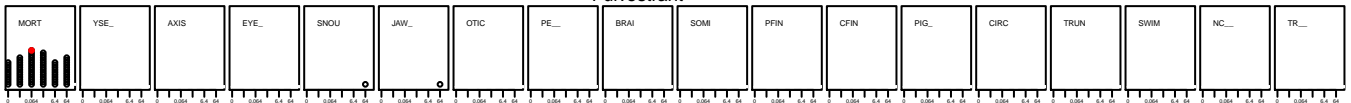

Furfural

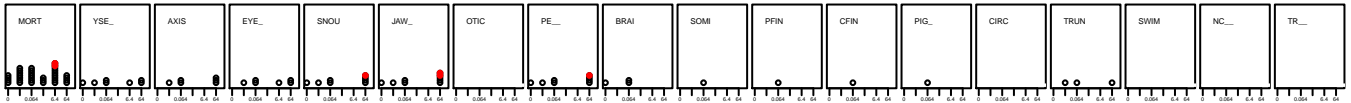

Genistein

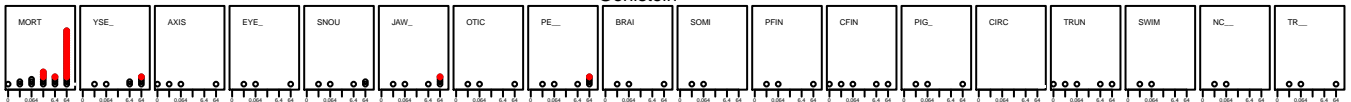

Gentian violet

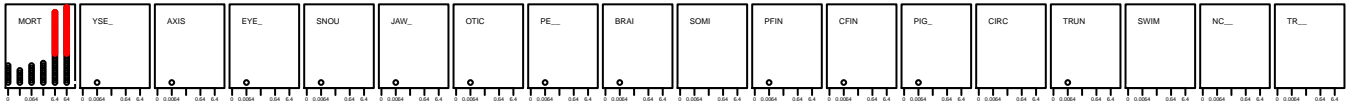

Geraniol

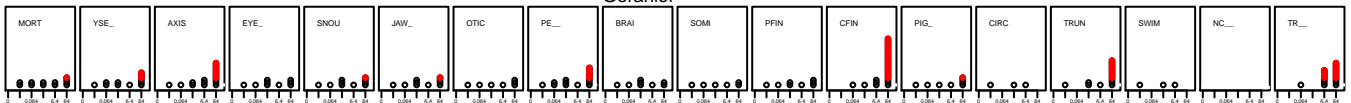

Geranyl acetate

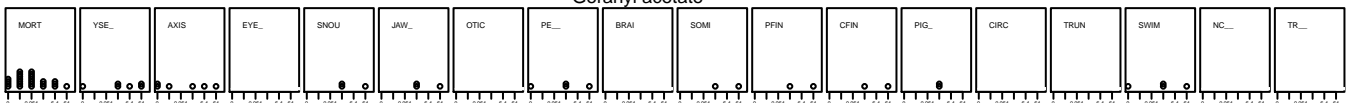

Glutaraldehyde

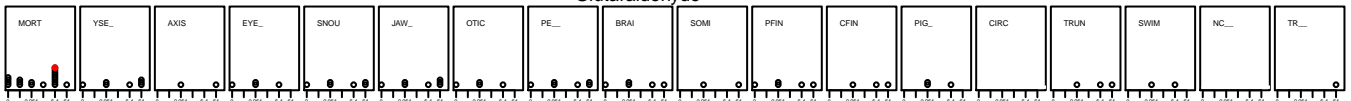

Glycerol

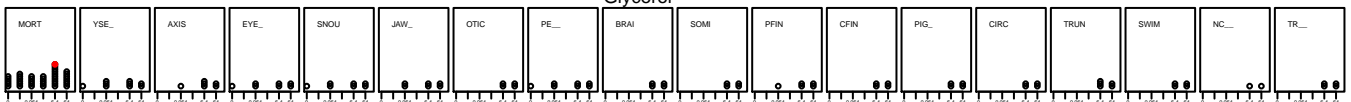



Glycidol

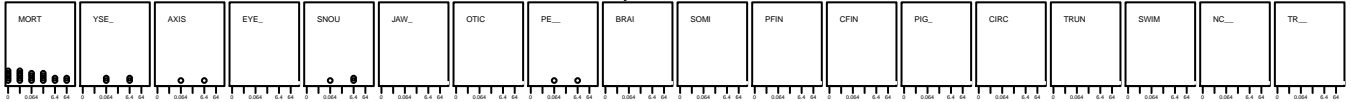

Haloperidol

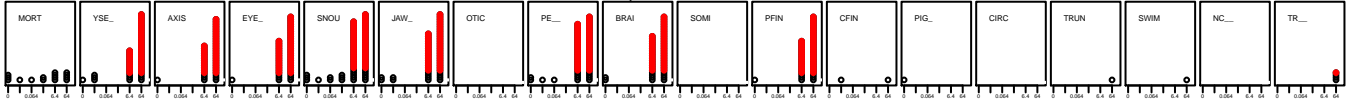

Heptachlor

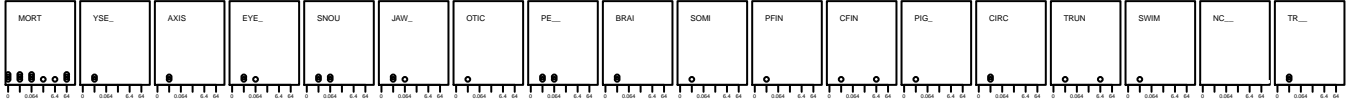

Heptachlor epoxide

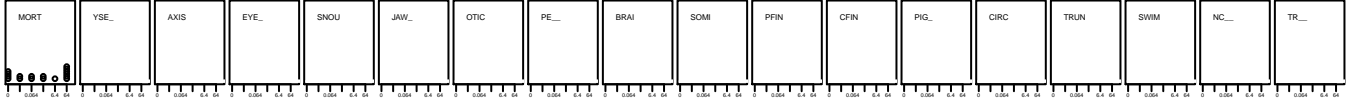

Heptanoic acid

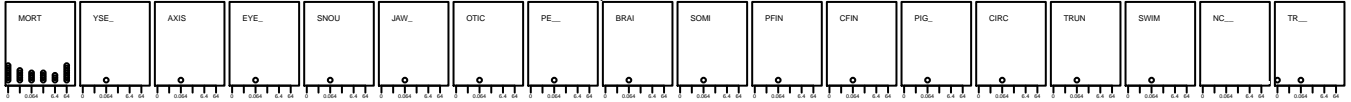

Hexachlorocyclopentadiene

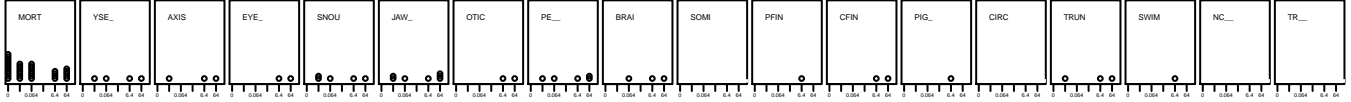

Hexaconazole

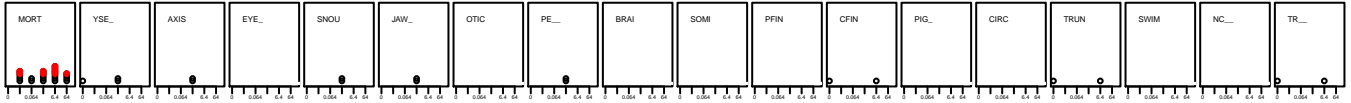

Hexadecane

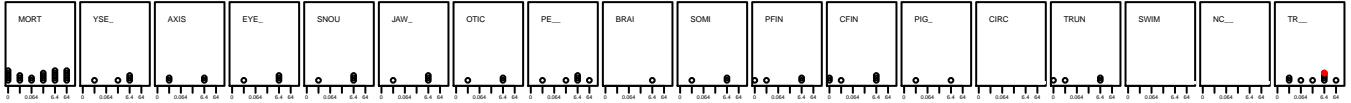

Hexaflumuron

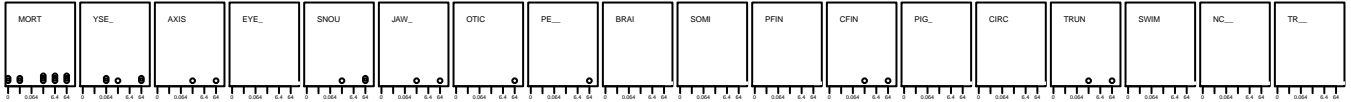

Hexane-16-diyl dibenzoate

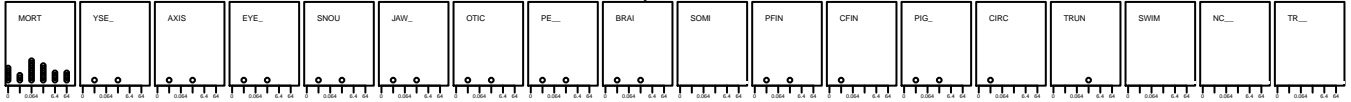

Hexanedinitrile

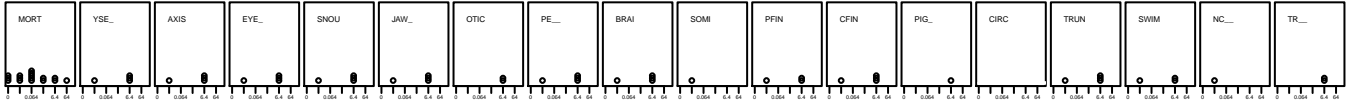

Hexanedioic acid

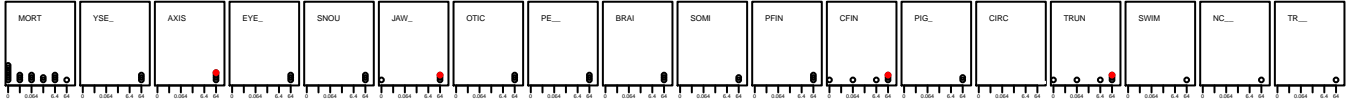

Hexanedioic acid diisononyl ester

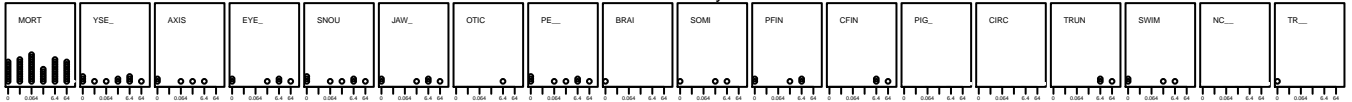

Hexanoic acid

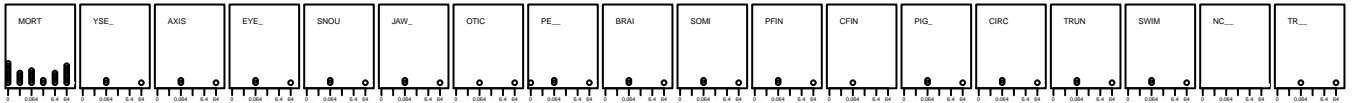

Hexazinone

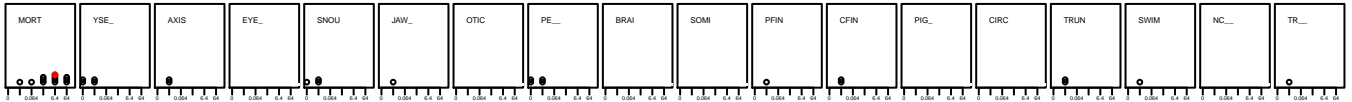

Hexythiazox

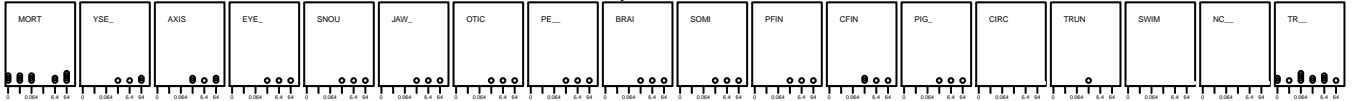

Hydrochlorothiazide

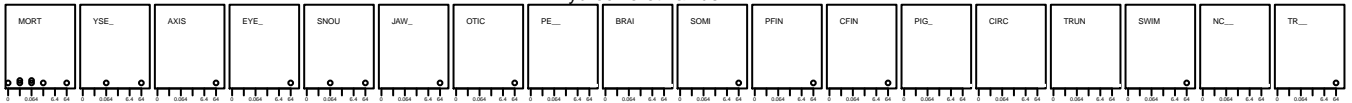

Hydroquinone

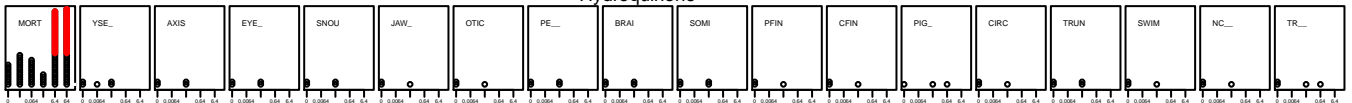

Hydroxyflutamide

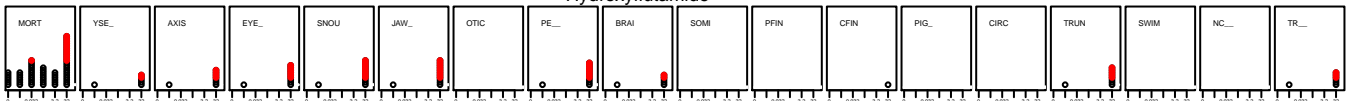

Hydroxyurea

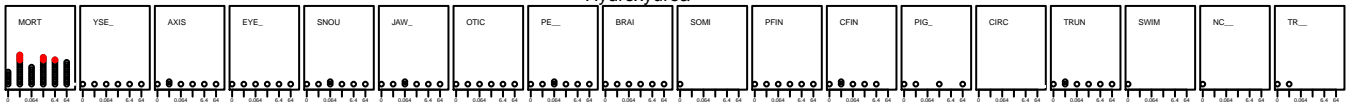

Icaridin

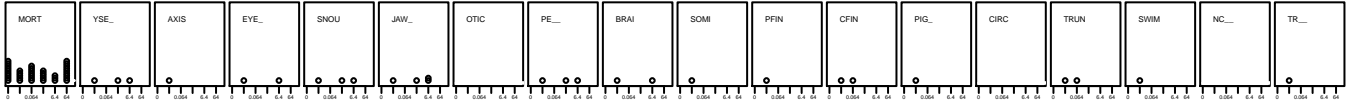

Ilepatril

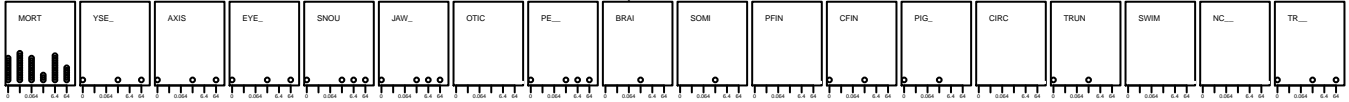

Imazail

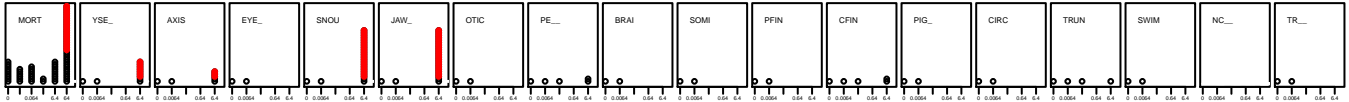

Imazamox

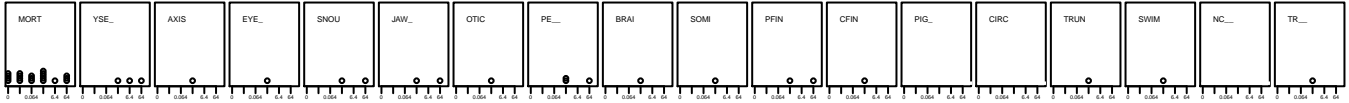

Imazapic

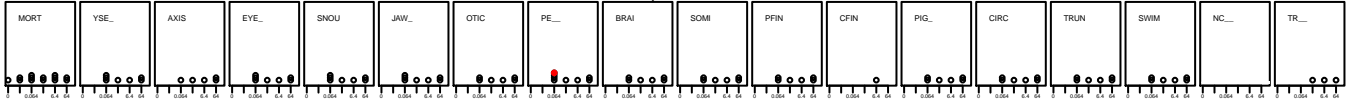

Imazapyr

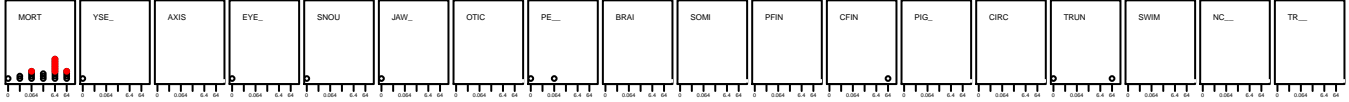

Imazaquin

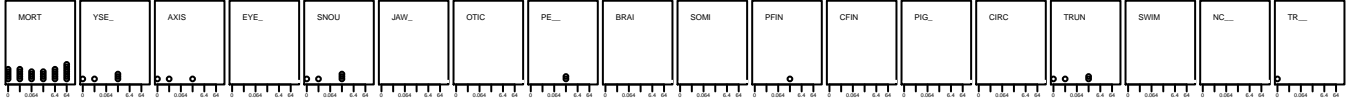

Imazethapyr

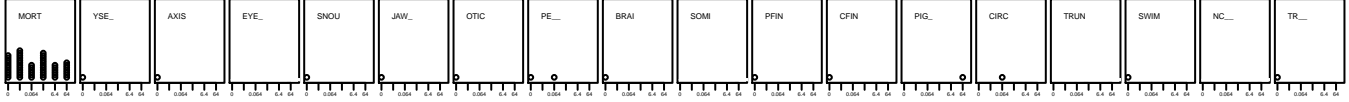

Imidacloprid

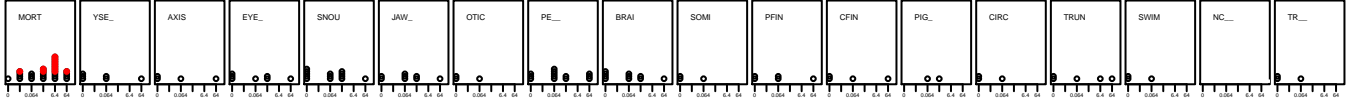

Indium arsenide

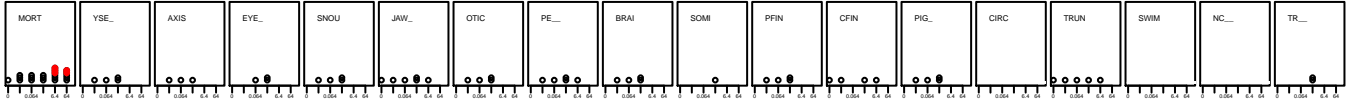

Indomethacin

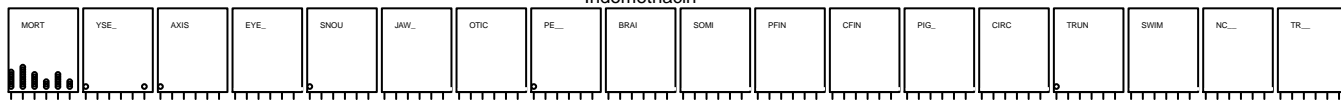

Indoxacarb

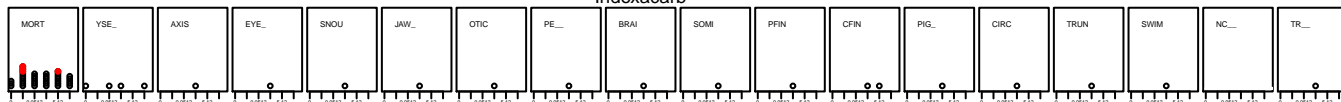

Ingliforib

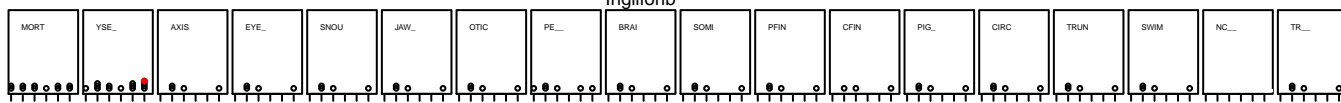

Iodosulfuron-methyl-sodium

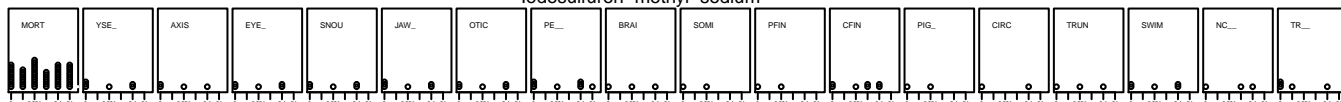

Iprodione

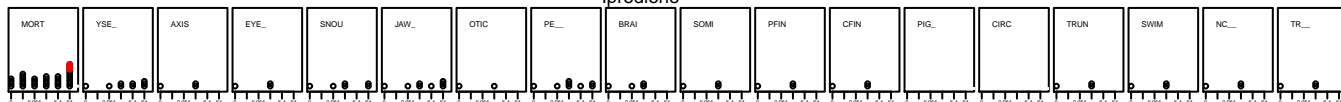

Isazofos

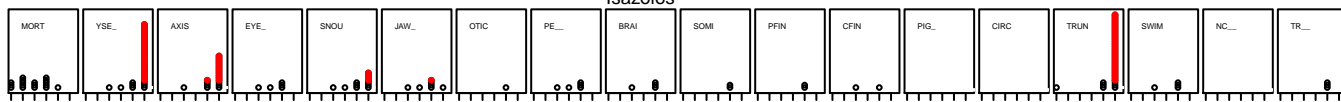

Isoeugenol

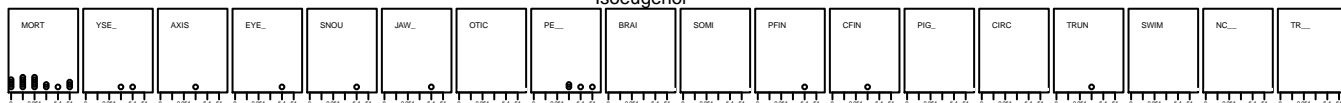

Isoniazid

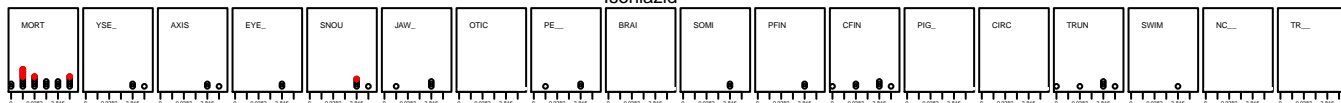

Isooctyl acrylate

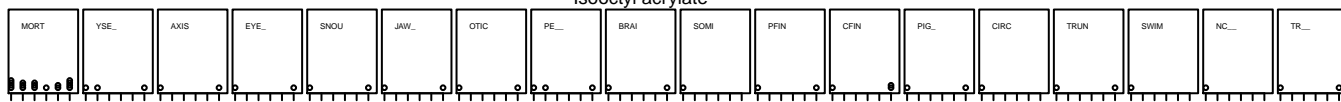

Isopentyl alcohol

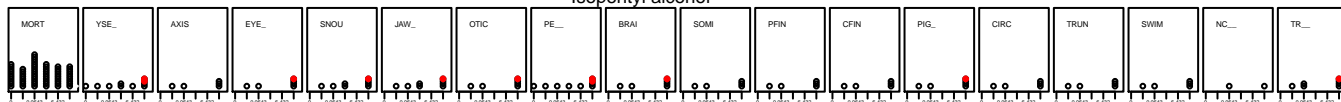

Isopentyl butyrate

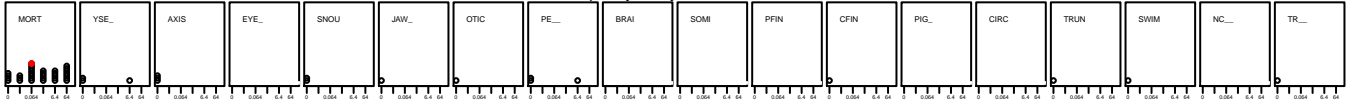

Isophorone

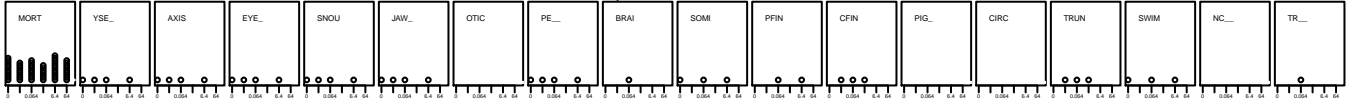

Isophorone diisocyanate

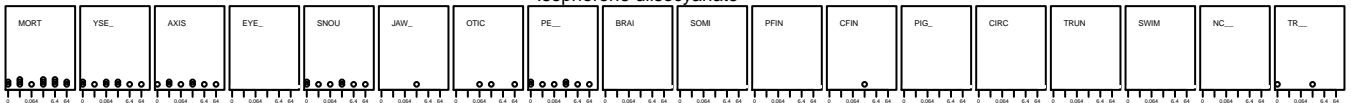

Isopropalin

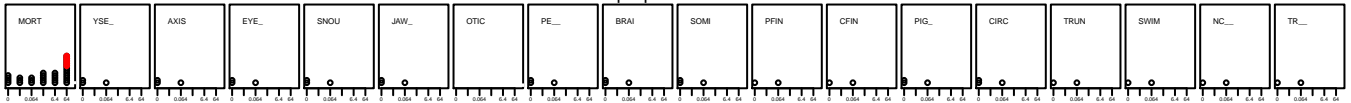

Isoproterenol hydrochloride

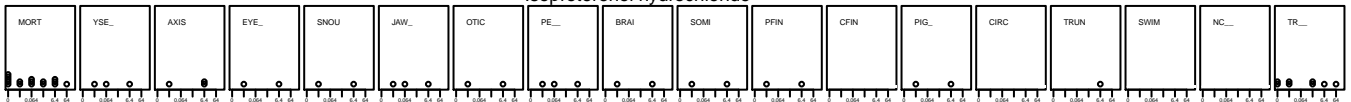

Isoxaben

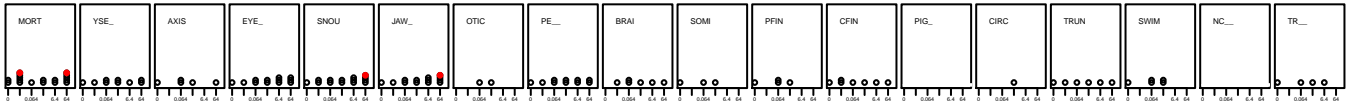

Isoxaffutole

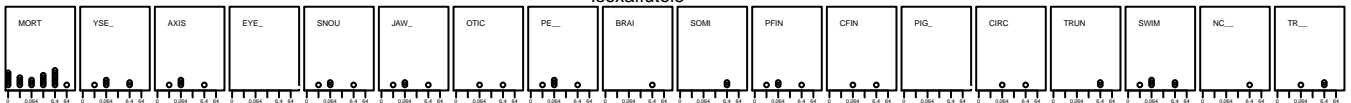

Kepone

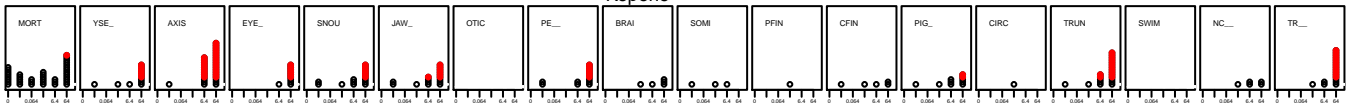

Ketoconazole

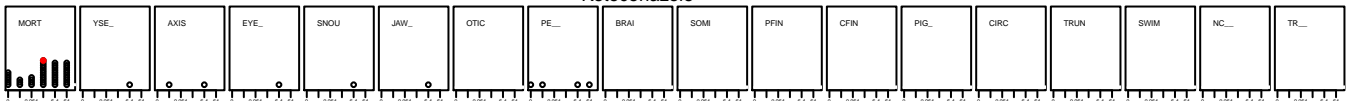

L-Tartaric acid

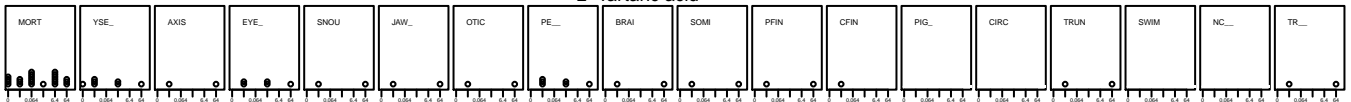

I-Tryptophan

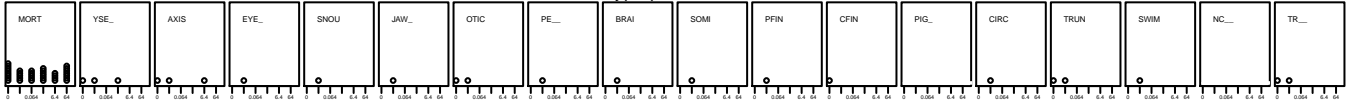

Lactofen

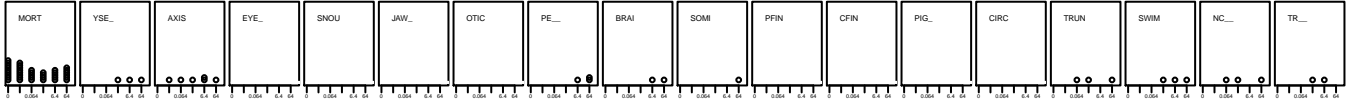

Lindane

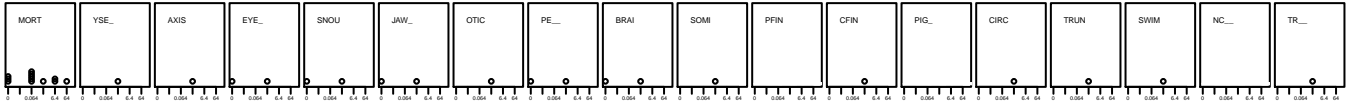

Linuron

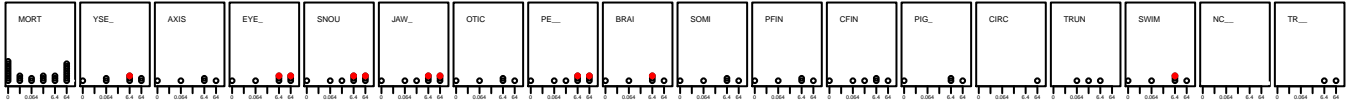

Lovastatin

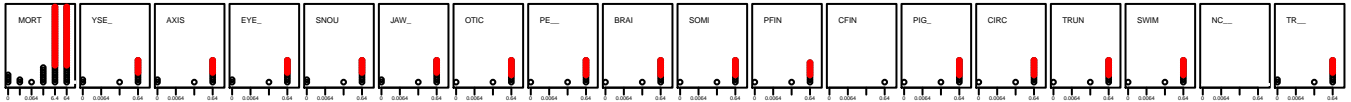

Malaoxon

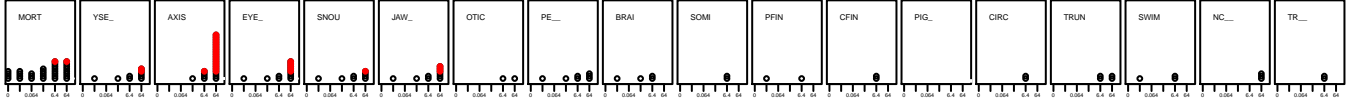

Malathion

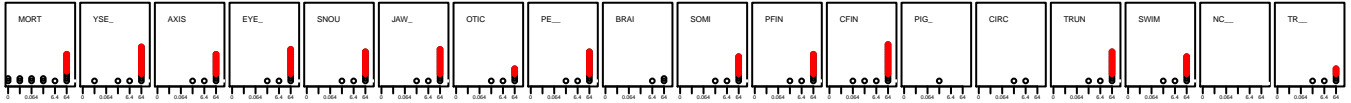

Maleic hydrazide

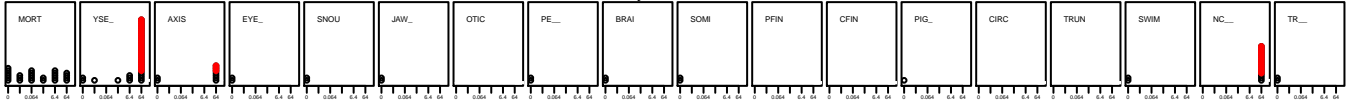

Maltol

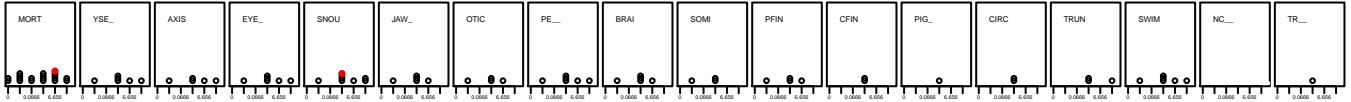

Mancozeb

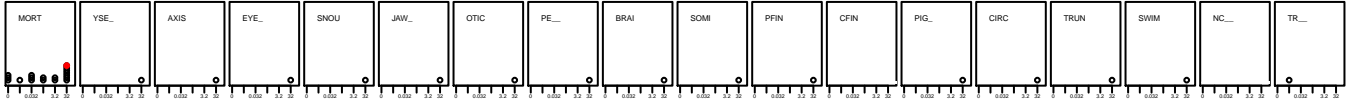

Maneb

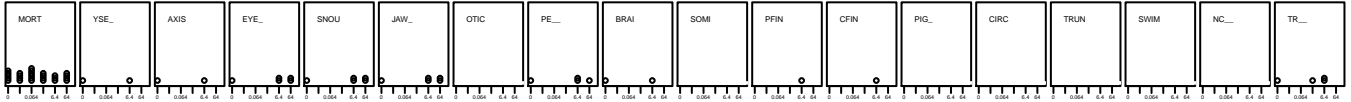

Mepanipyrim

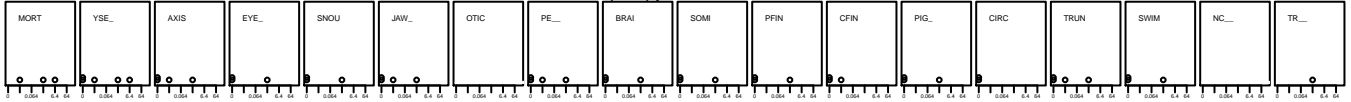

Mepiquat chloride

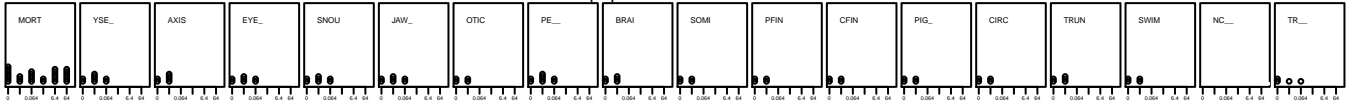

Mercuric chloride

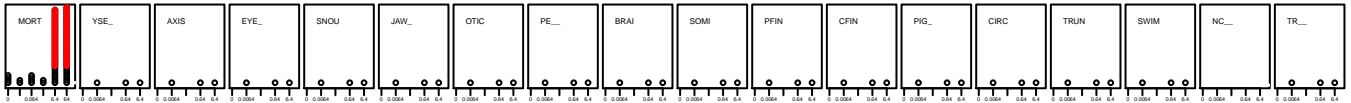

meso-Hexestrol

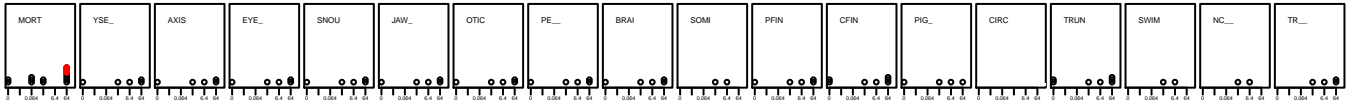

Mesotrione

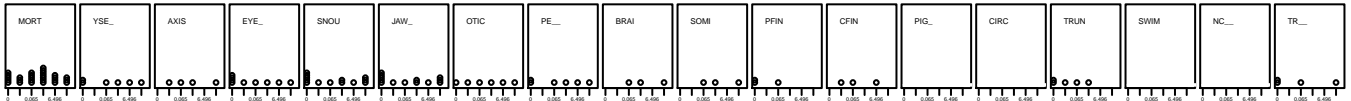

Metalaxyl

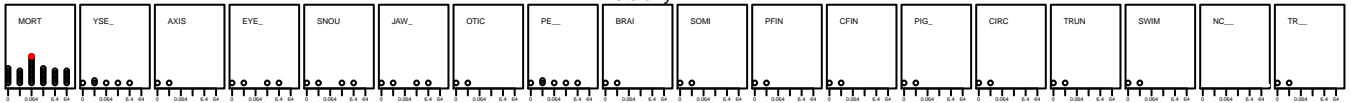

Metam-sodium hydrate

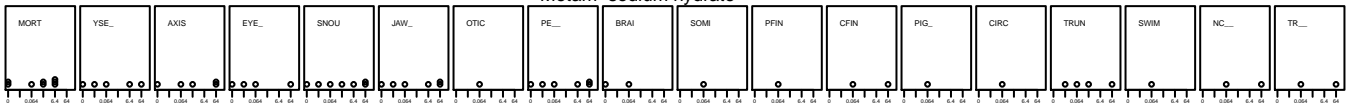

Methacrylamide

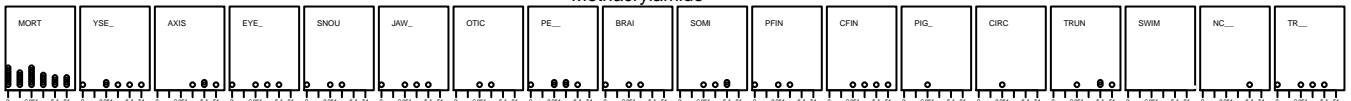

Methadone hydrochloride

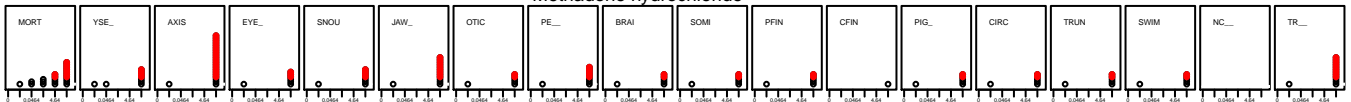

Methamidophos

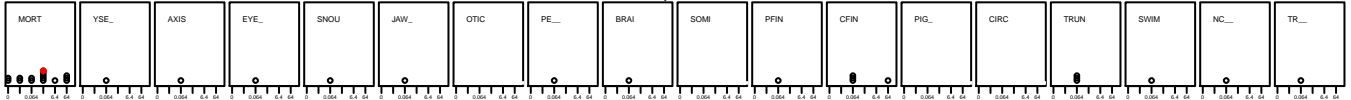

Methanamine

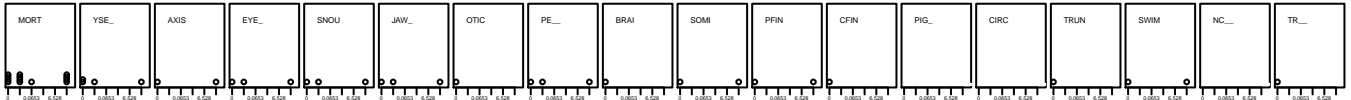

Methidathion

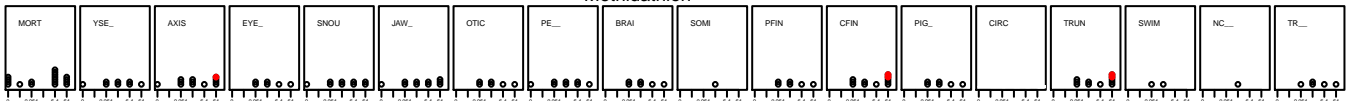

Methimazole

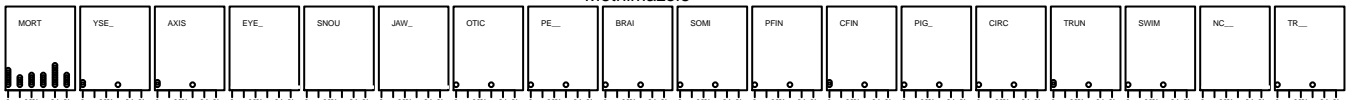

Methomyl

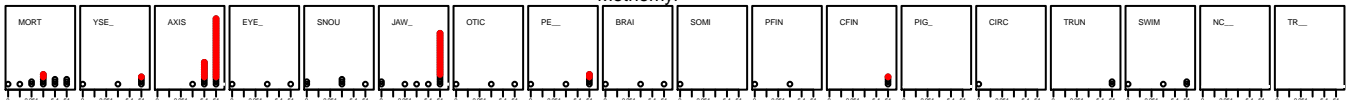

Methotrexate

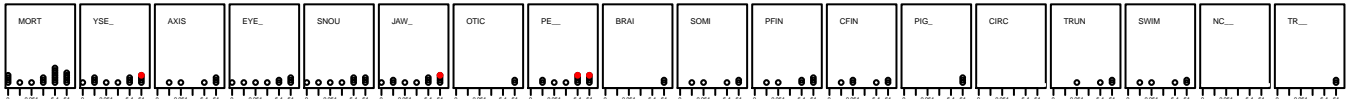

Methoxychlor

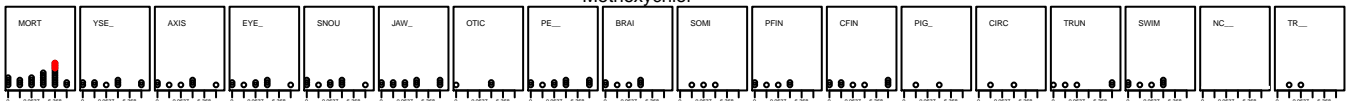

Methoxyfenozide

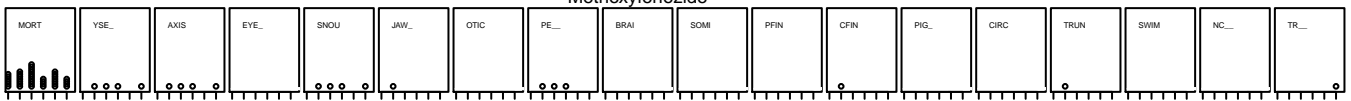

Methyl 2-aminobenzoate

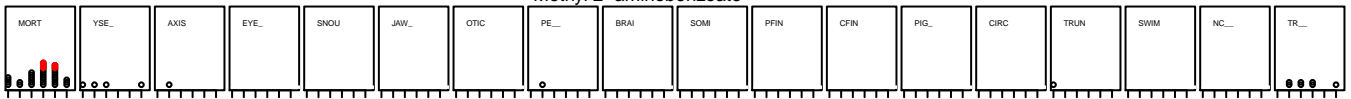

Methyl dodecanoate

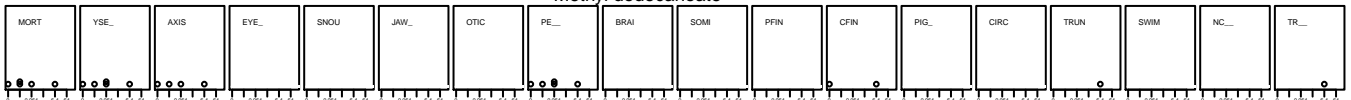



Methyl isothiocyanate

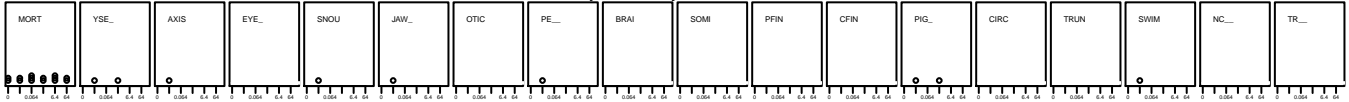

Methyl methanesulfonate

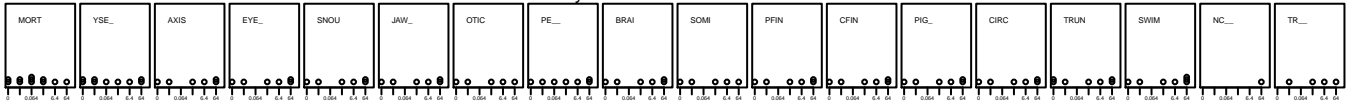

Methyl octanoate

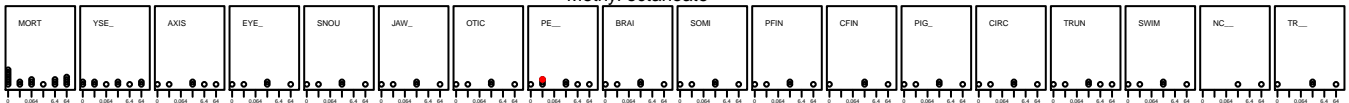

Methyl parathion

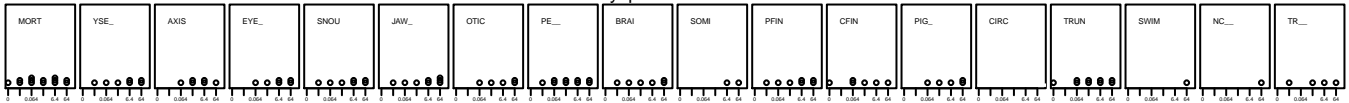

Methyl salicylate

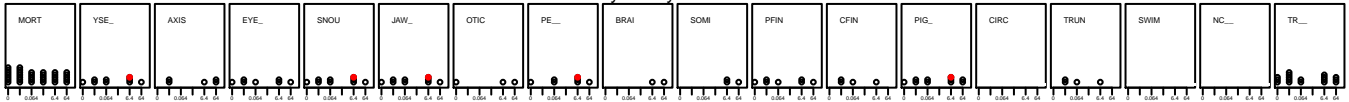

Methyldopa sesquihydrate

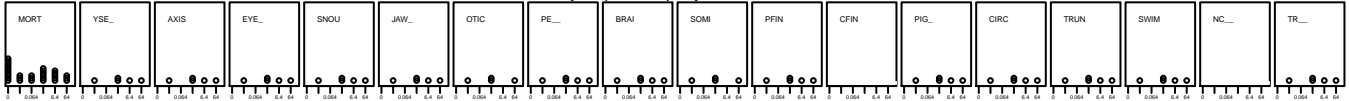

Methylene bis(thiocyanate)

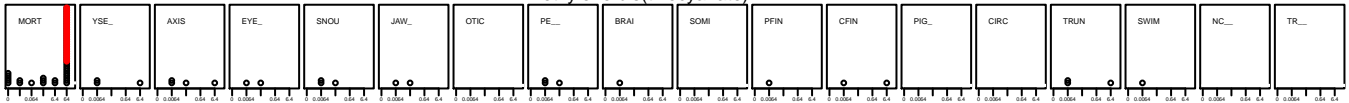

Methyleugenol

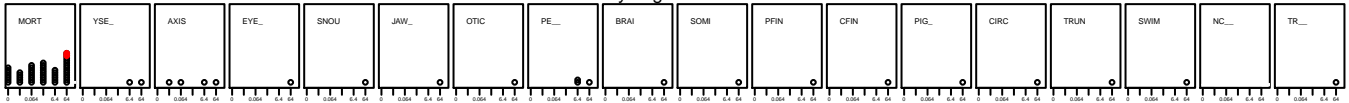

Methylparaben

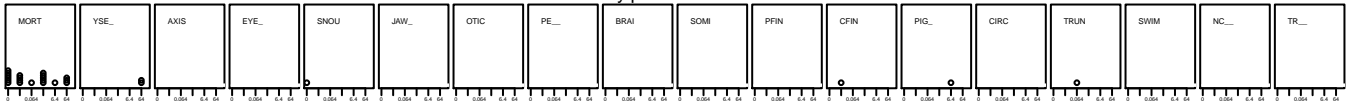

Metolachlor

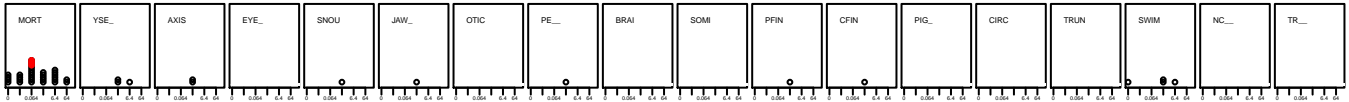

Metribuzin

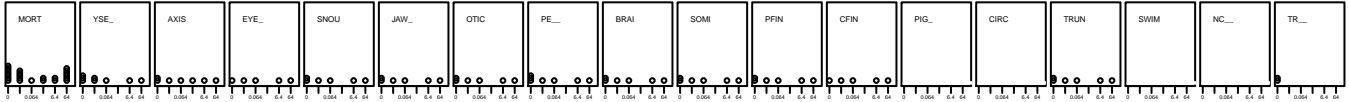

Mevinphos

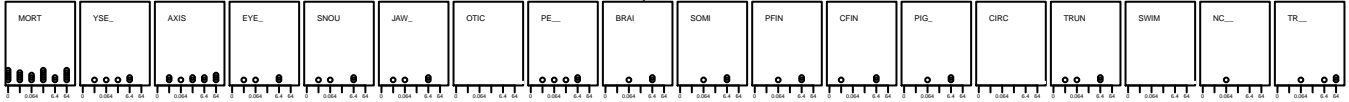

MGK-264

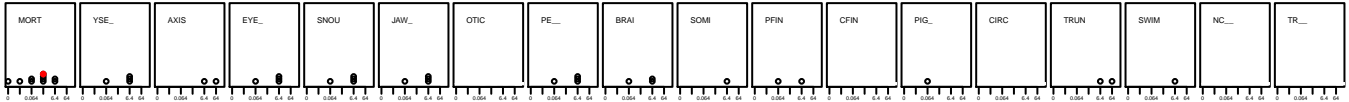

Michler's ketone

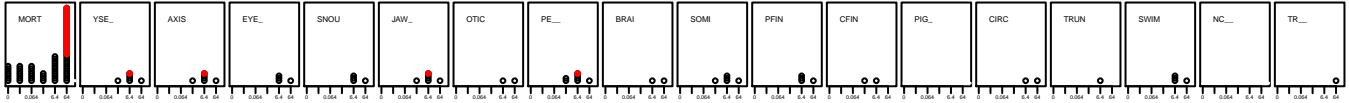

Mifepristone

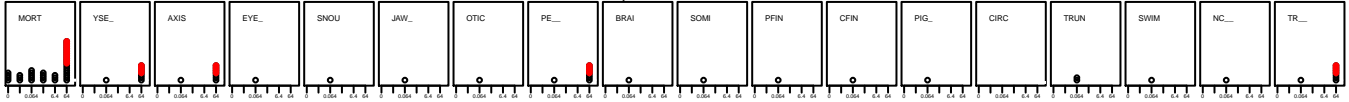

Milbemectin (mixture of >=70 percent Milbemcin A4 & <=30 percent Milbemycin A3)

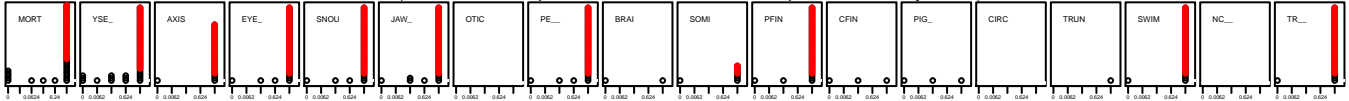

Mirex

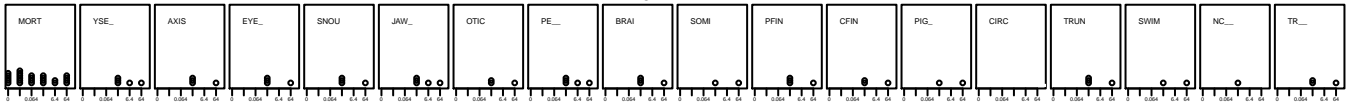

Molinate

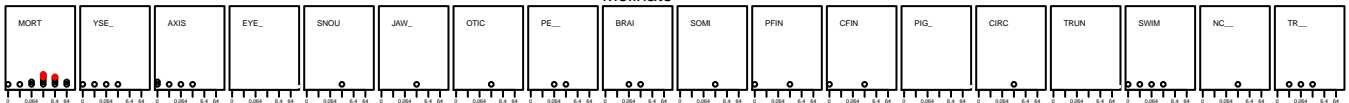

Mono(2-ethylhexyl) phthalate

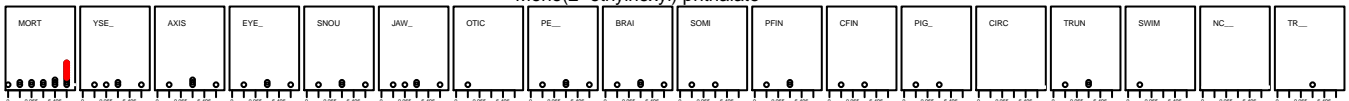

Monobenzyl phthalate

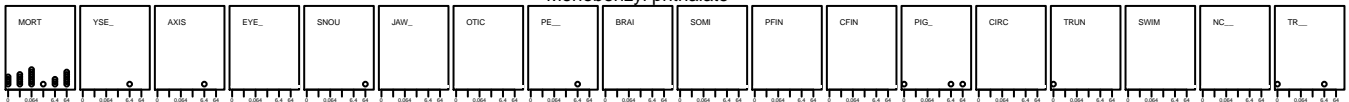

Monobutyl phthalate

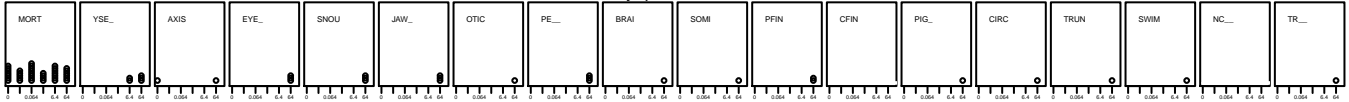

Monocrotaphos

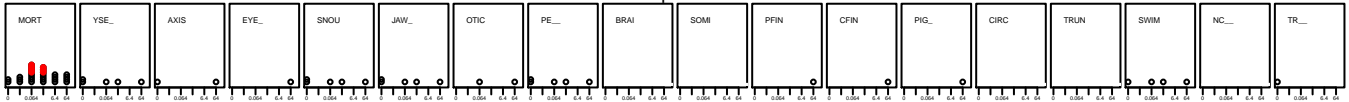

Monomethyl phthalate

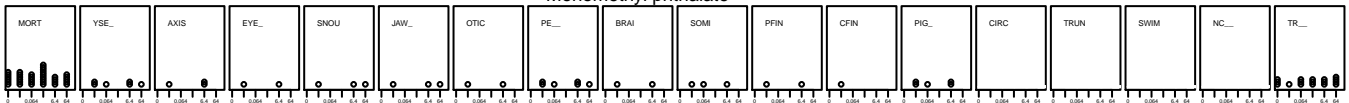

Monuron

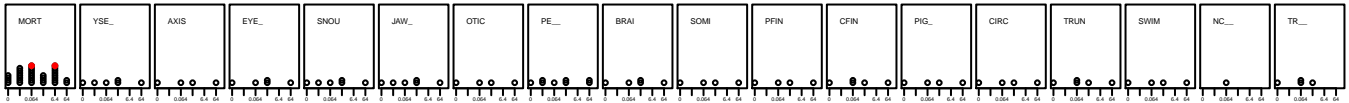

Myclobutanil

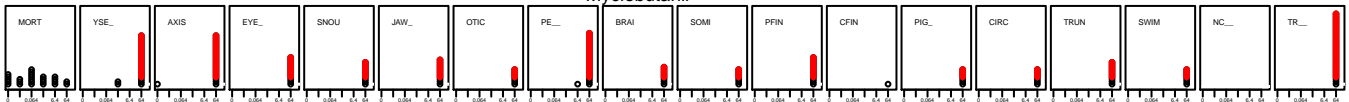

Myrcene

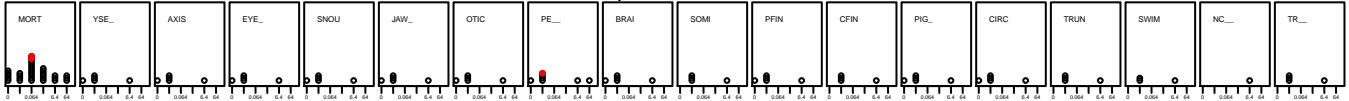

N-(123567-hexahydro-s-indacen-4-ylcarbamoyl)-4-(2-hydroxypropan-2-yl)furan-2-sulfonamide

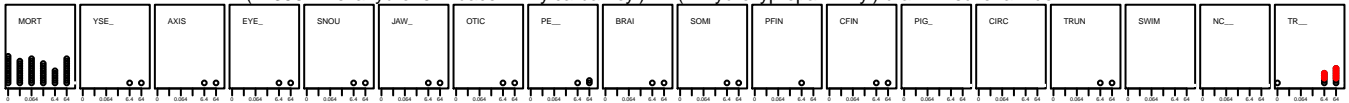

N-(5-fluoro-3-methyl-1H-indol-1-yl)-4-methyl-2-(pyridin-2-yl)pyrimidine-5-carboxamide

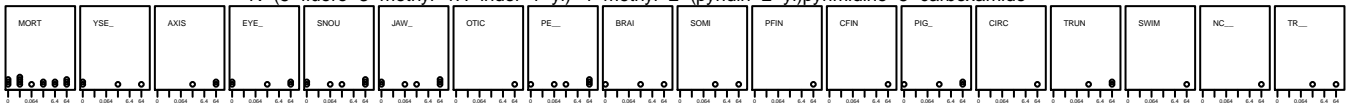

N-(Butan-2-yl)-1-(2-chlorophenyl)-N-methylisoquinoline-3-carboxamide

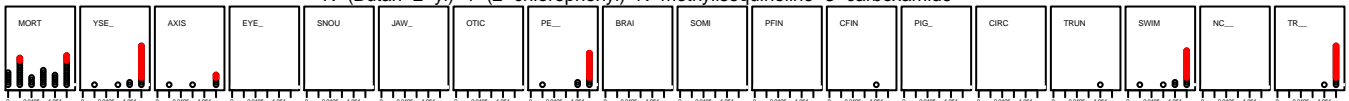

N-[(1-[(2-(diethylamino)ethyl)amino]-7-methoxy-9-oxo-9H-thioxanthen-4-yl)methyl]formamide

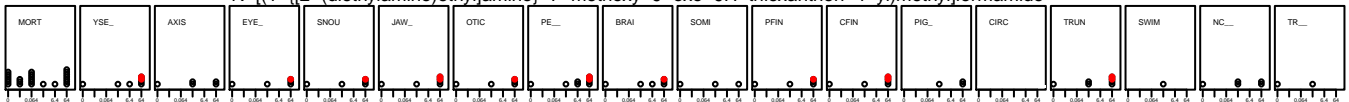

N-[(1R3S4S)-3-[(4-(3-benzyl-1-ethyl-1H-pyrazol-5-yl)piperidin-1-yl)methyl]-4-(3-fluorophenyl)cyclopentyl]-N-methyl-D-valine

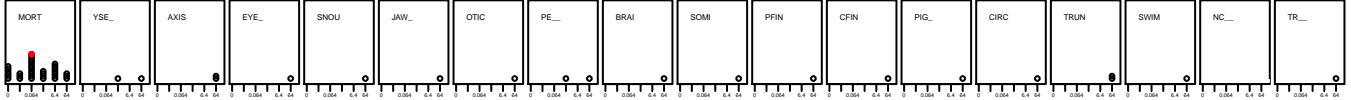

N-[(3R)-1-azabicyclo[2.2.2]oct-3-yl]-23-dihydro-14-benzodioxine-6-carboxamide

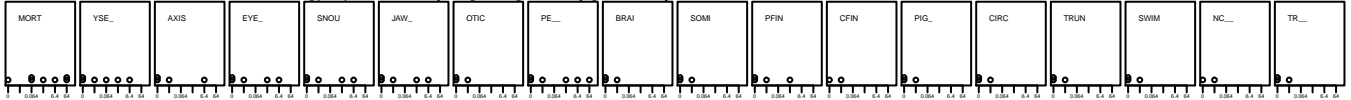

N-[(3R)-1-azabicyclo[2.2.2]oct-3-yl]furo[2,3-c]pyridine-5-carboxamide

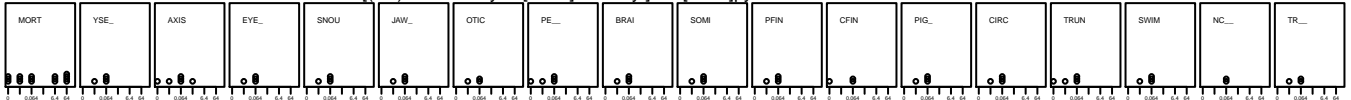

N-[(3R)-9-amino-4-oxo-1-phenyl-3467-tetrahydro[14]diazepino[6,71-h]indol-3-yl]pyridine-3-carboxamide

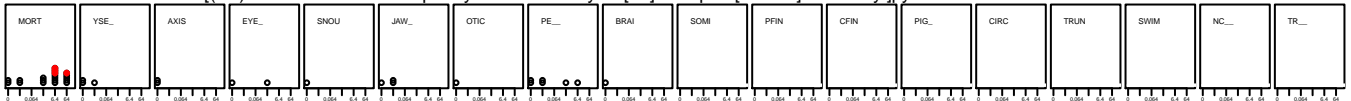

N-[(3R)-9-methyl-4-oxo-1-phenyl-3467-tetrahydro[14]diazepino[6,71-h]indol-3-yl]pyridine-4-carboxamide

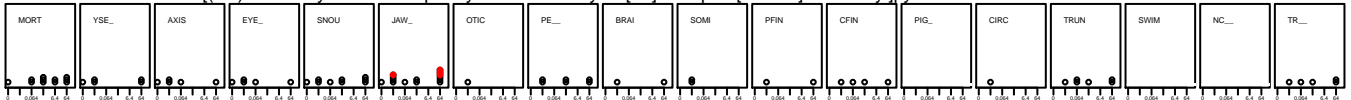

N-[(S)-(3S)-1-azabicyclo[2.2.2]oct-3-yl(phenyl)methyl]-26-dichloro-3-(trifluoromethyl)benzamide hydrochloride (1:1)

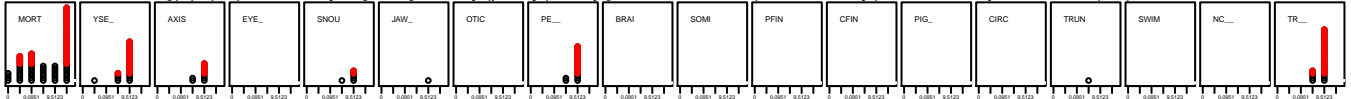

N-([4-(4-fluorophenoxy)phenyl]sulfonyl)-N-[1-(hydroxycarbonyl)cyclopentyl]-L-alanine

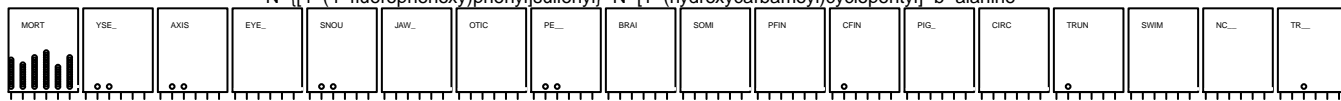

N-(4-((methylamino)methyl)phenyl)-4-oxo-4,5,6,7-tetrahydro-1H-indole-3-carboxamide

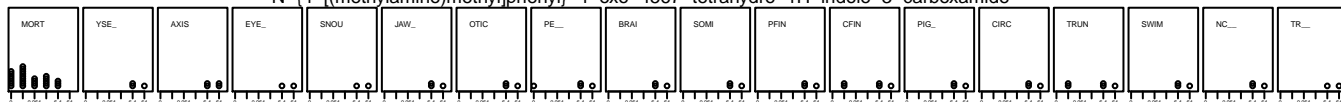

N-(trans-4-((2R)-2-fluoro-2-(2-fluorophenyl)ethoxy)cyclohexyl)-5H-pyrazolo[3,4-d]pyrimidin-4-amine

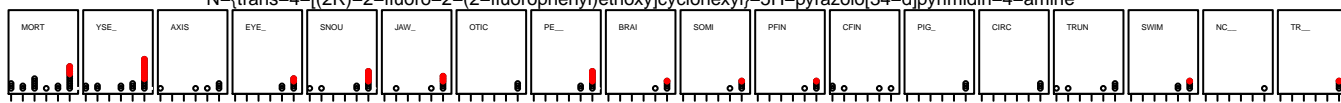

N-benzyl-6-ethoxy-4-oxo-1,4-dihydro-15-naphthyridine-3-carboxamide

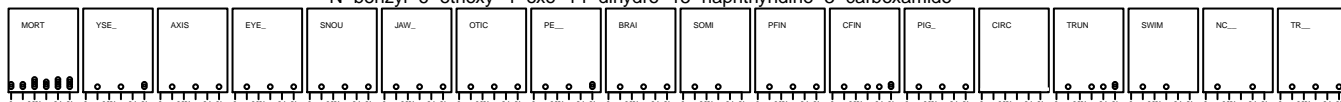

N-ethyl-3-methyl-N-(propan-2-yl)-5-((2S)-2-(pyridin-4-ylamino)propyl)oxy)benzamide 4-methylbenzenesulfonate

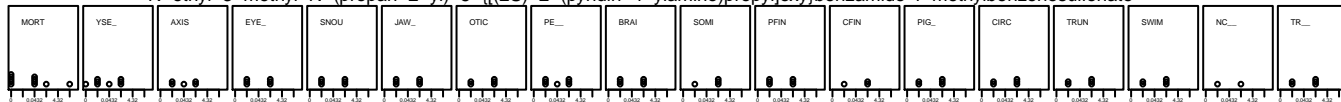

N-Ethyl-3-methylaniline

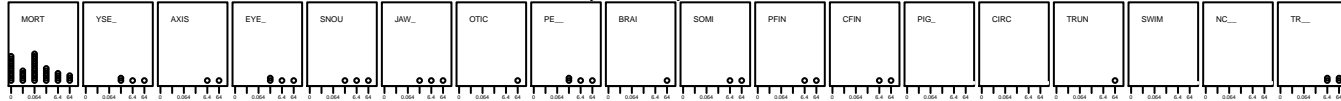

N-Ethylaniline

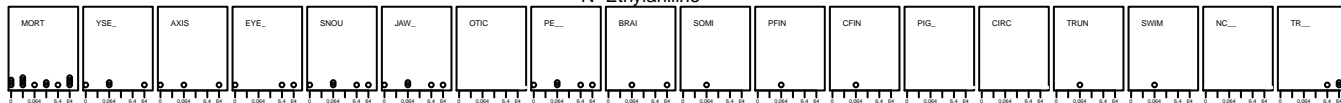

N-Methyl-2-pyrrolidone

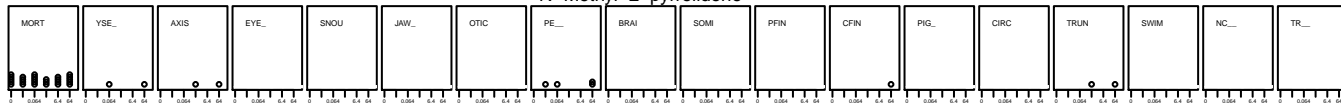

N-Methylacetamide

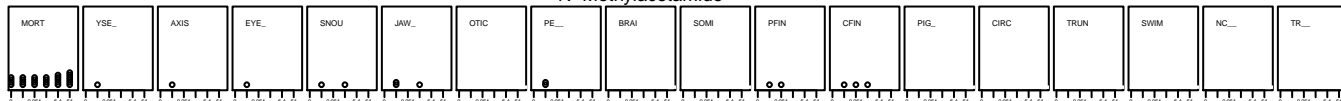

N-Methyldiethylamine

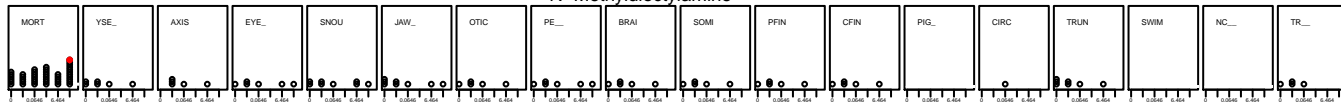

N-Nitrosodibutylamine

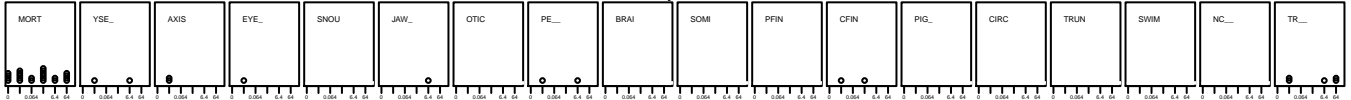

N-Nitrosodiethylamine

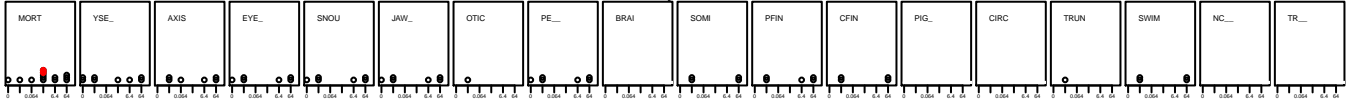

N-Nitrosodimethylamine

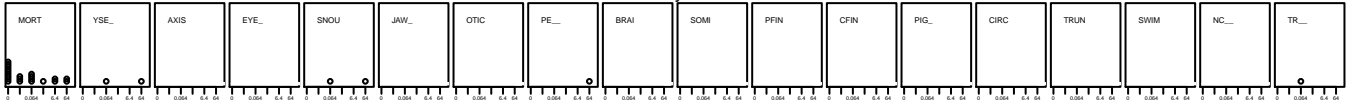

N-Nitrosodiphenylamine

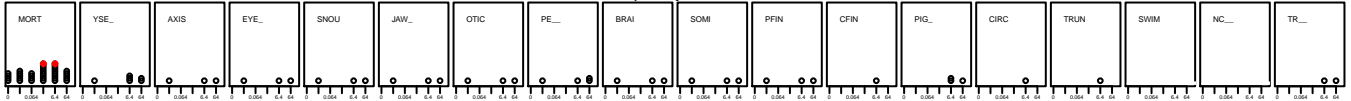

N-Nitrosodipropylamine

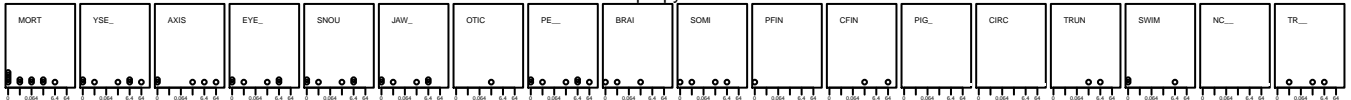

N-Phenyl-14-benzenediamine

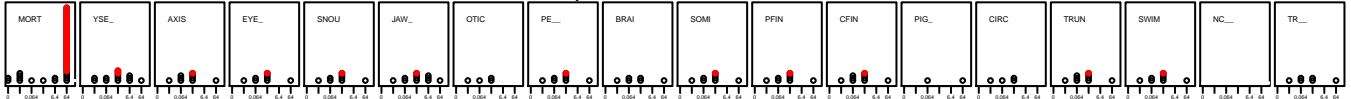

N-Vinyl-2-pyrrolidone

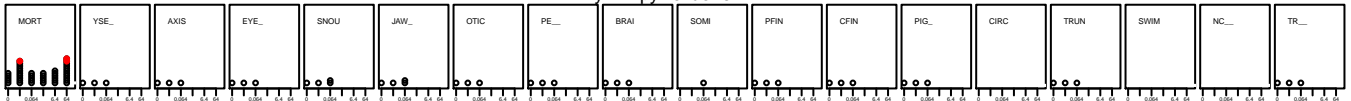

N2-[4-cyano-3-(trifluoromethyl)phenyl]-N2-(222-trifluoroethyl)glycinamide

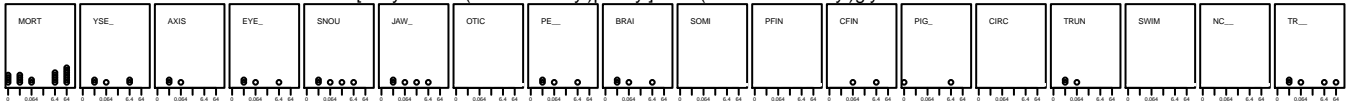

Naled

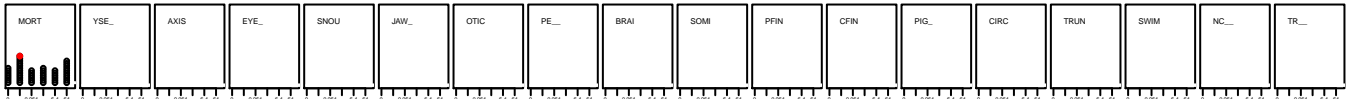

oxol-5-yl)-3-((6-methoxynaphthalen-2-yl)sulfonyl)amino)propanoyl]-4-(((2R6S)-26-dimethylpiperidin-1-yl)methyl)-N-methyl-N-propan-2-yl-D-phenylalaninir

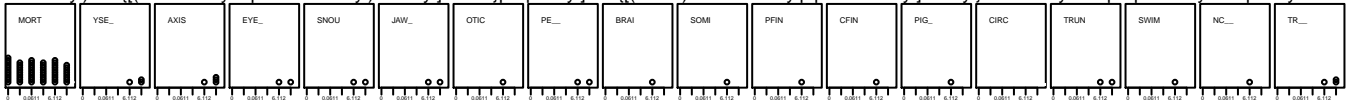

Naphthalene

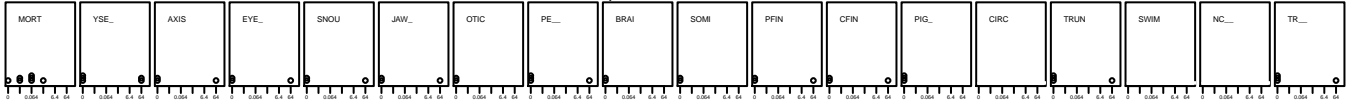

Napropamide

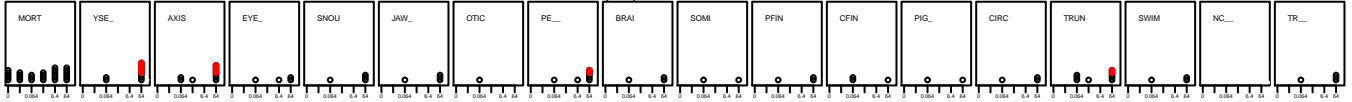

Nelivaptan

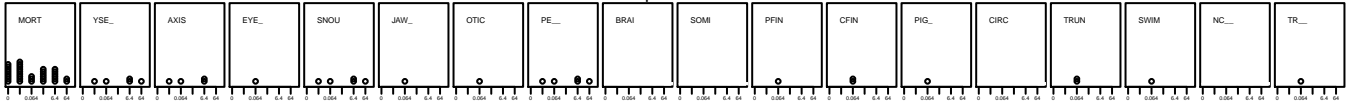

Nicosamide

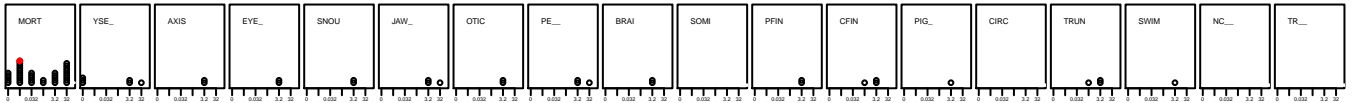

Nicotine

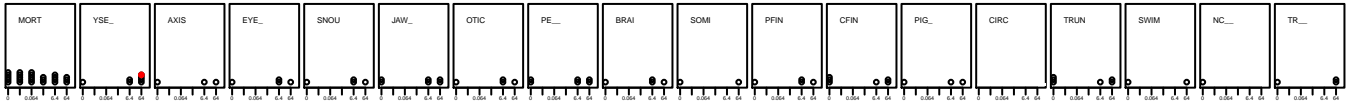

Nicotinic acid

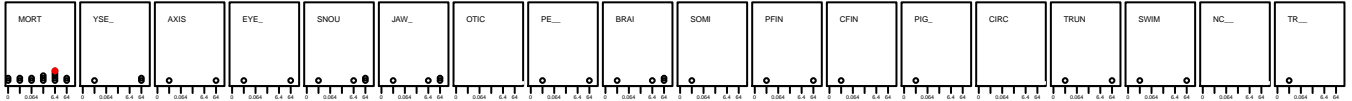

Nilutamide

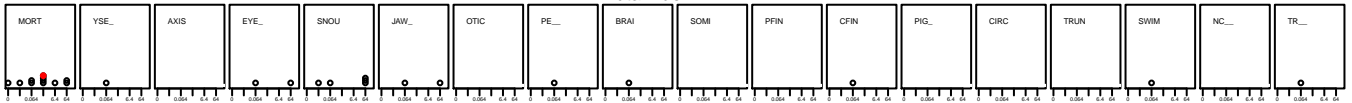

Nitrapyrin

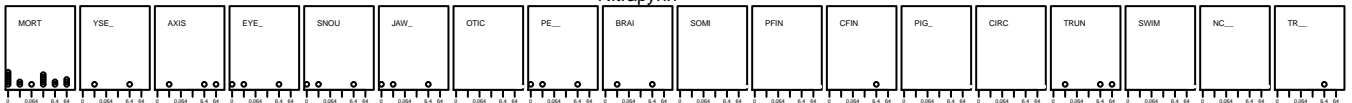

Nitrotriacetic acid

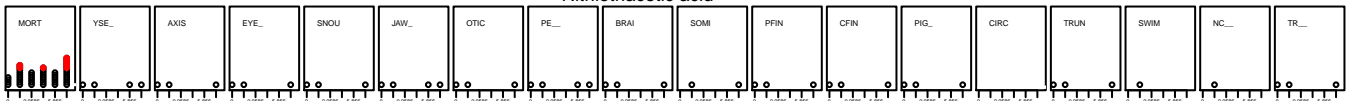

Nitrobenzene

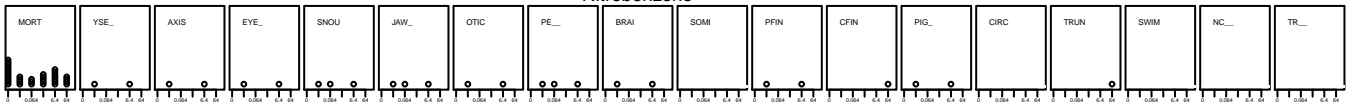

Nitrofen

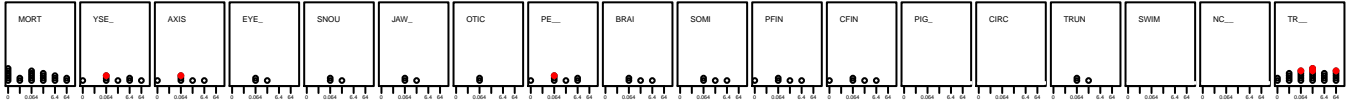

Nitrofurantoin

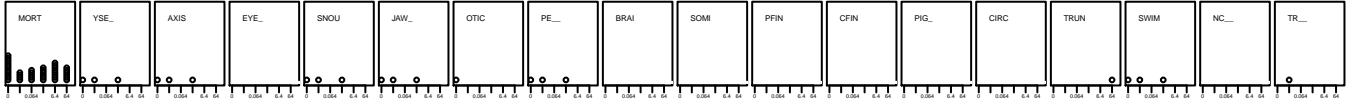

Nitrofurazone

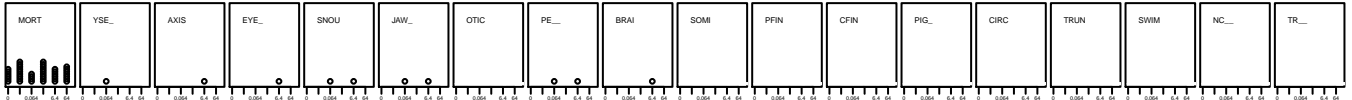

NN-Diethyl-3-methylbenzamide

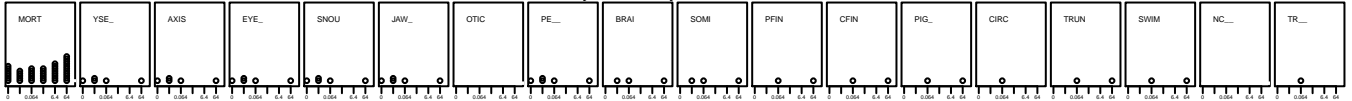

NN-Diethylaniline

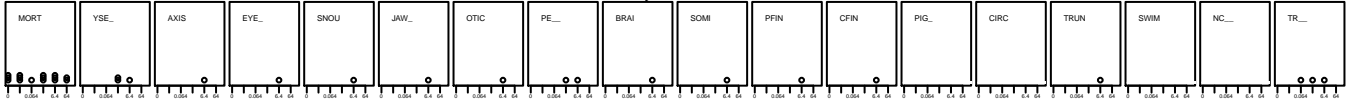

NN-Diethylethanolamine

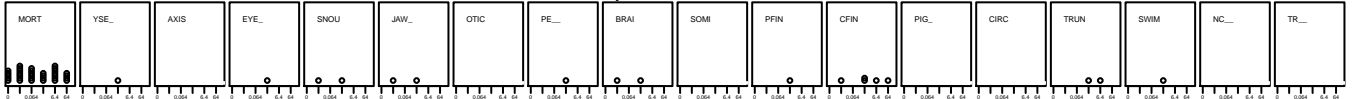

NN-Dimethylaniline

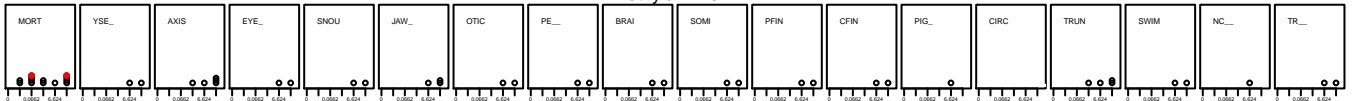

NN-Dimethyldecylamine oxide

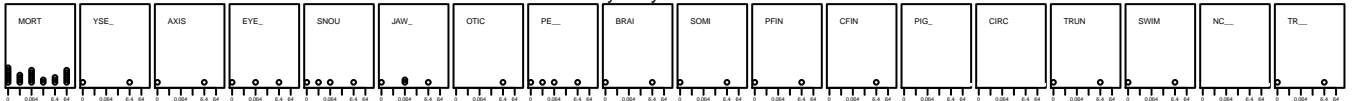

NN-Dimethylformamide

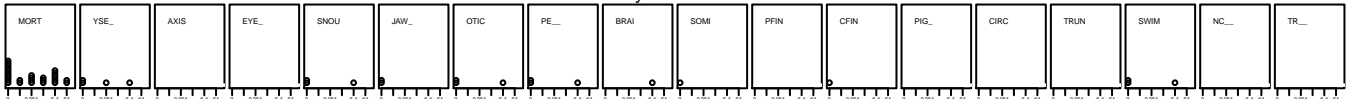

NN-Dimethyloctylamine

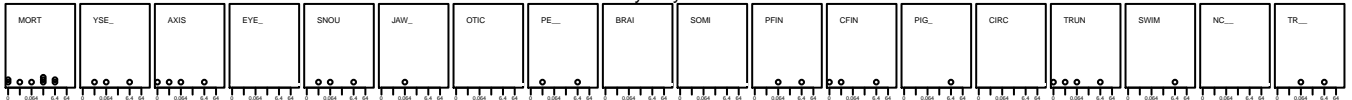



NN'-Methylenebisacrylamide

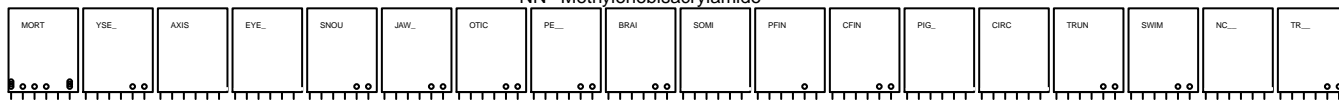

NN4-Trimethylaniline

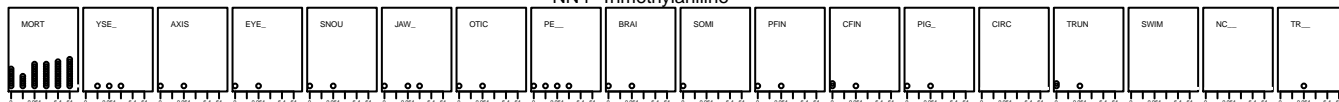

NNN-Trimethyl(oxiran-2-yl)methanaminium chloride

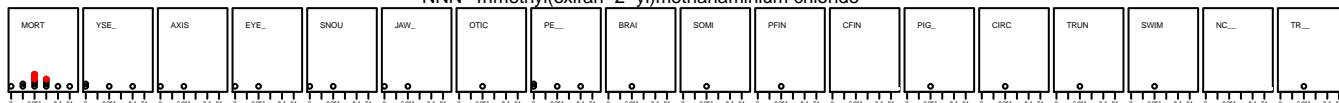

NNN'N'-Tetrakis(2-Hydroxypropyl)ethylenediamine

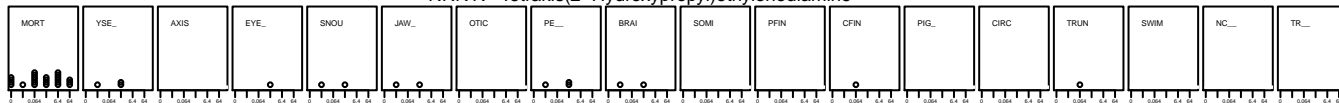

Nonanoic acid

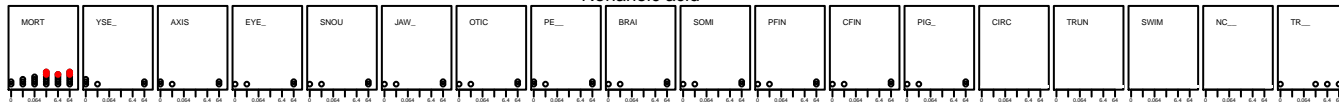

Norethindrone

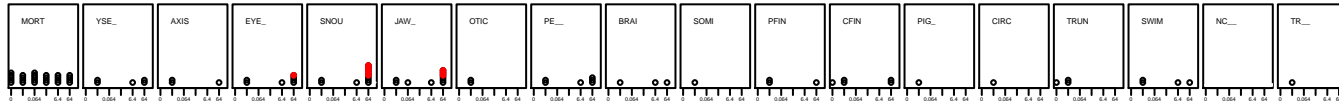

Norflurazon

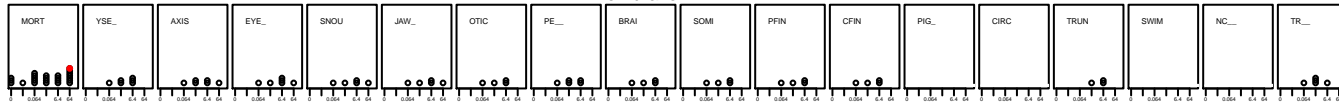

Norgestrel

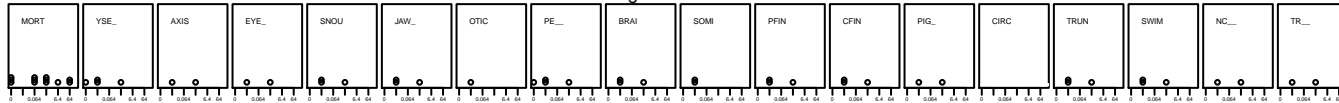

Novaluron

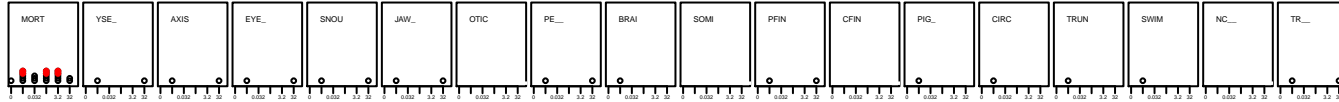

O-Ethyl O-(4-nitrophenyl) phenylphosphonothioate

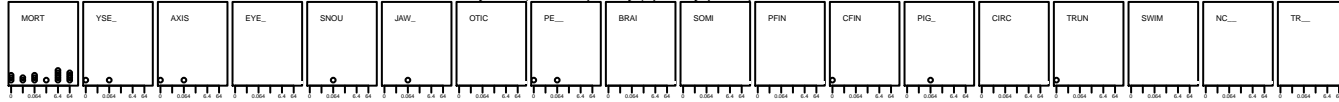

Octabenzene

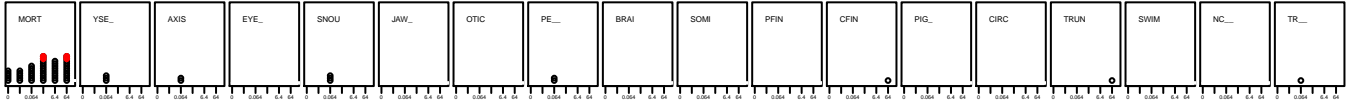

Octadecanoic acid

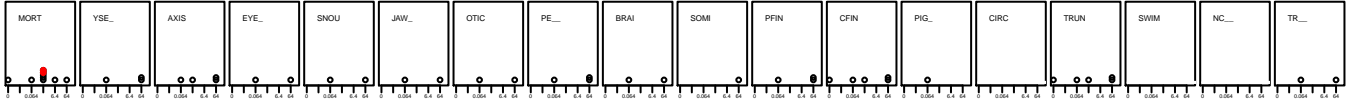

Octamethylcyclotetrasiloxane

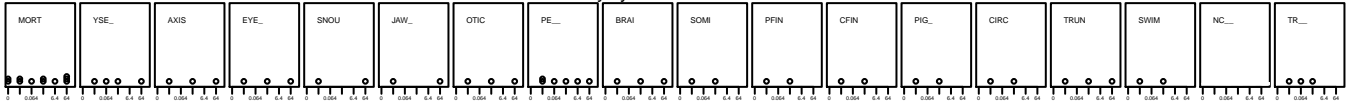

Octanal

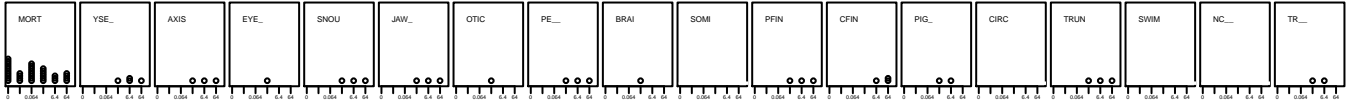

Octanoic acid

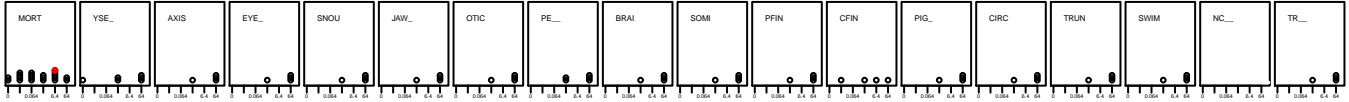

Octhilinone

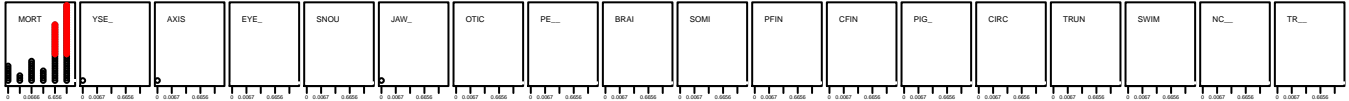

Octrizole

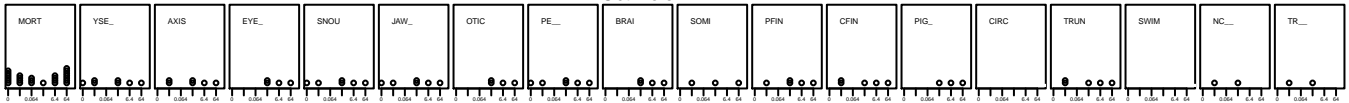

Octyl gallate

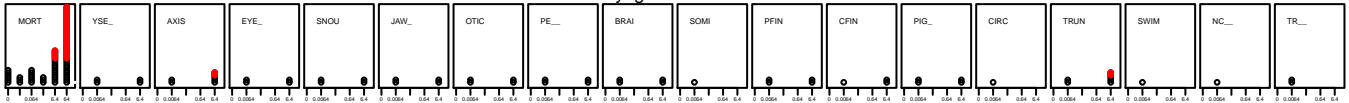

op'-DDT

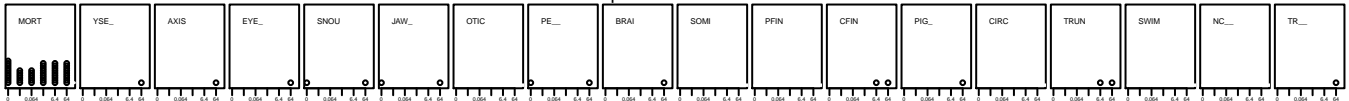

Oryzalin

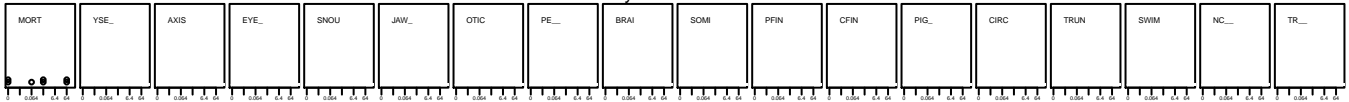

Oxadiazon

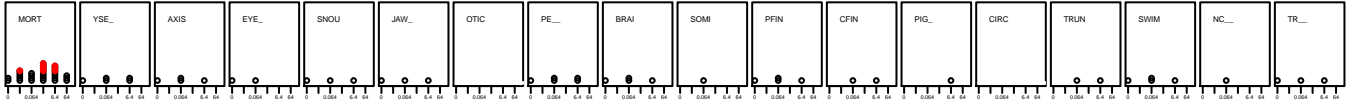

Oxamyl

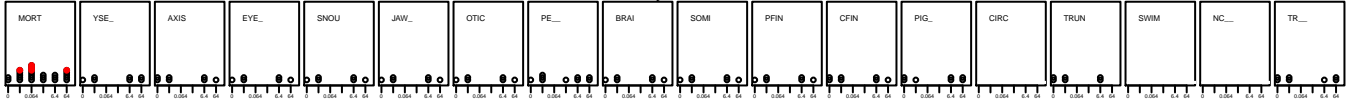

Oxyfluorfen

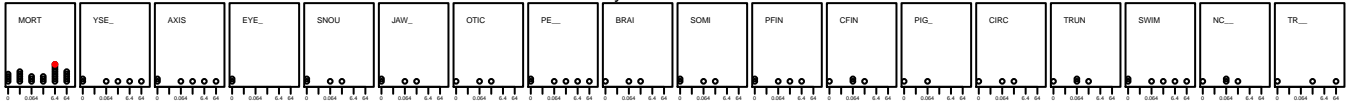

Oxytetracycline dihydrate

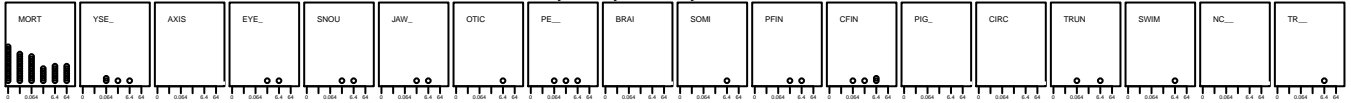

Oxytetracycline hydrochloride

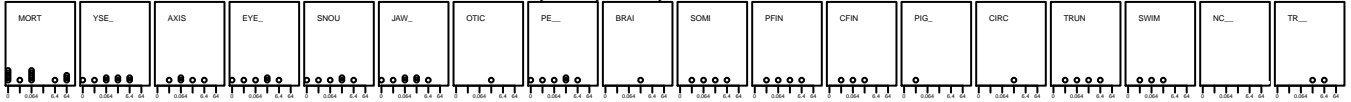

p-Bromodiphenyl ether

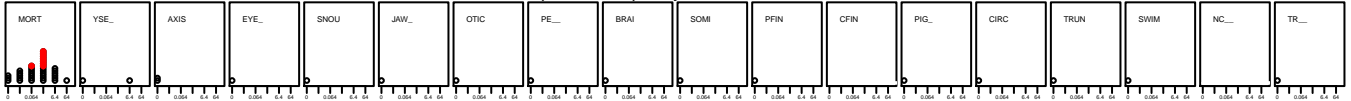

p-Cymene

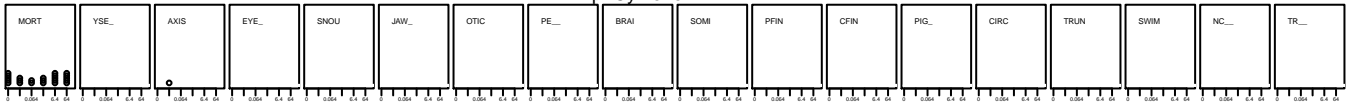

Paclitaxel

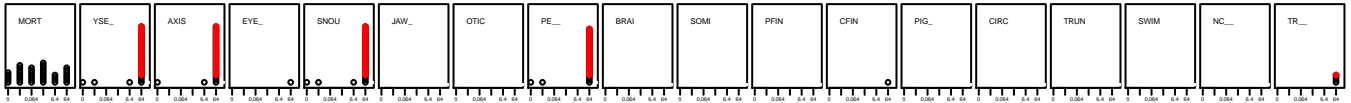

Parathion

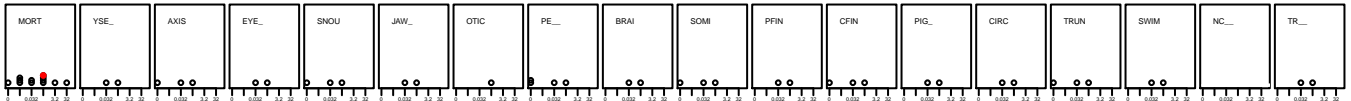

Pendimethalin

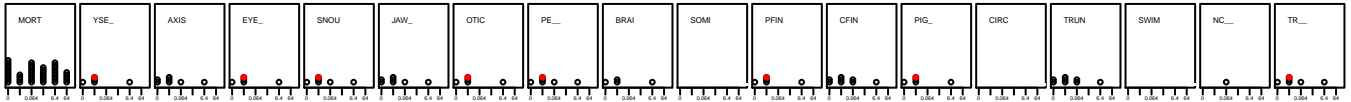

Penoxsulam

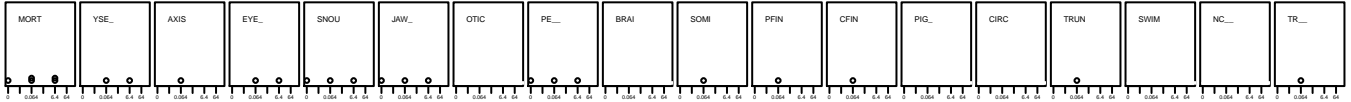

Pentachloronitrobenzene

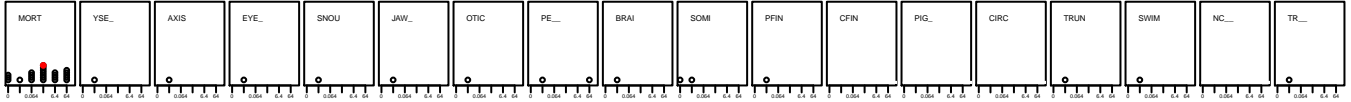

Pentachlorophenol

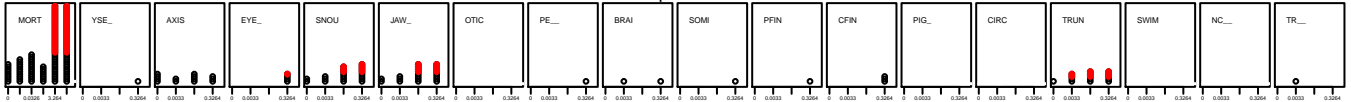

Pentachloropyridine

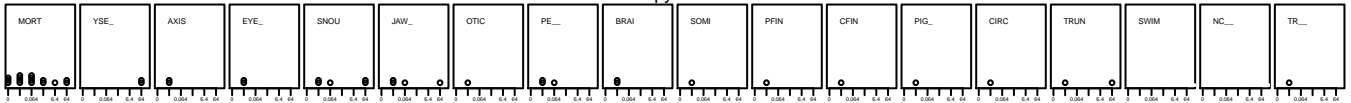

Pentadecane

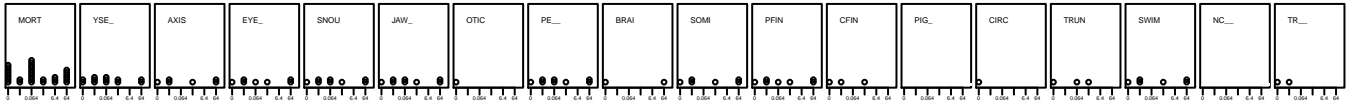

Pentaerythritol

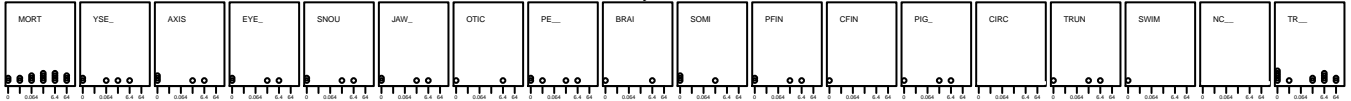

Pentamidine isethionate

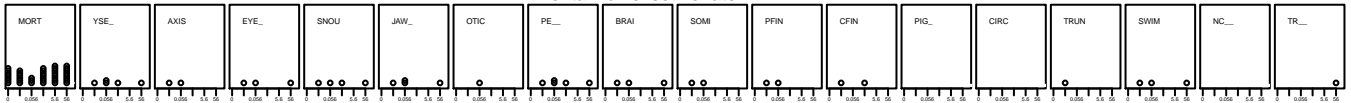

Pentanal

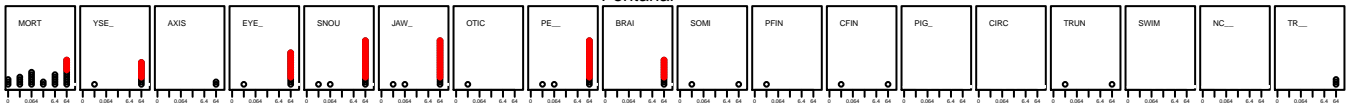

Pentane-15-diyl dibenzoate

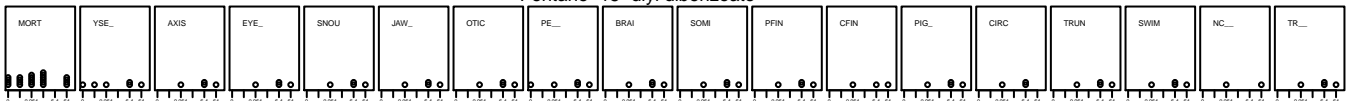

Pentyl acetate

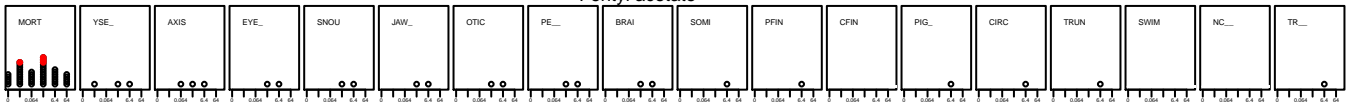

Perfluorodecanoic acid

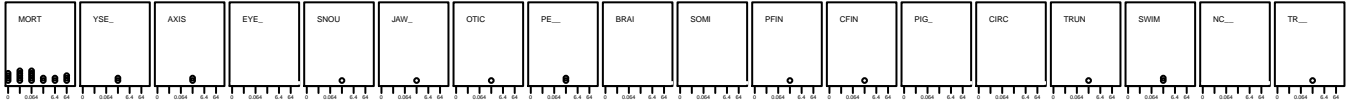

Perfluoroheptanoic acid

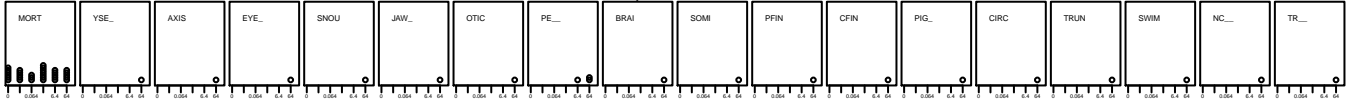

Perfluorohexanoic acid

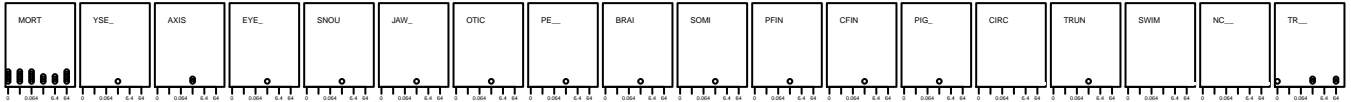

Perfluorononanoic acid

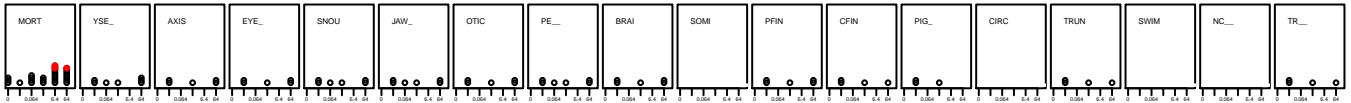

Perfluorooctane sulfonic acid

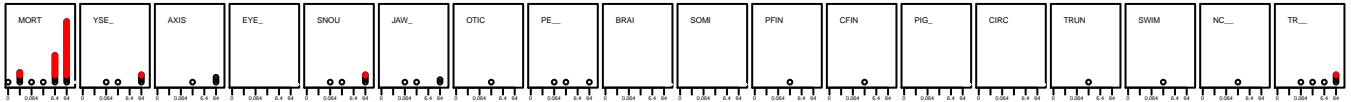

Perfluorooctanesulfonamide

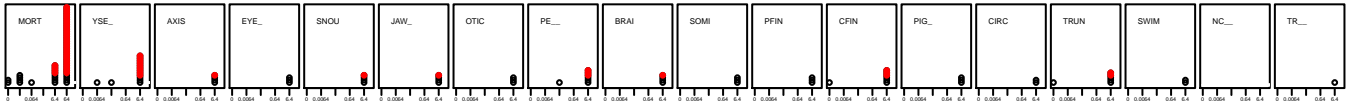

Perfluorooctanoic acid

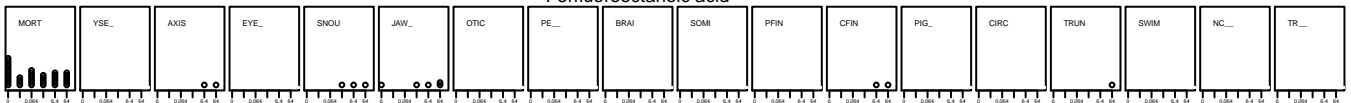

Perfluoroundecanoic acid

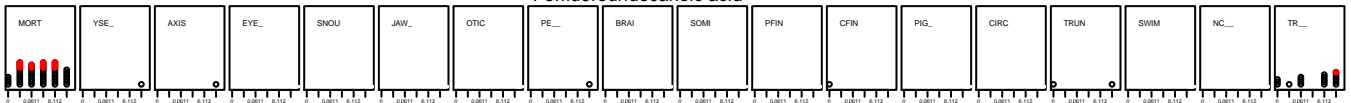

Permethrin

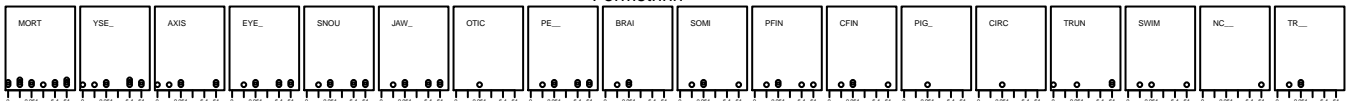

Phenanthrene

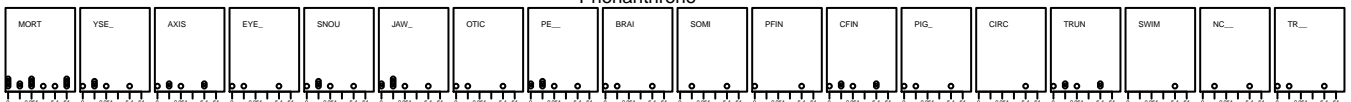

Phenobarbital sodium

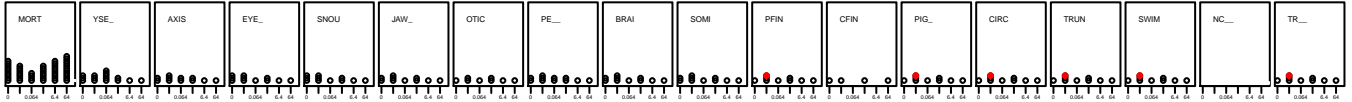

Phenol

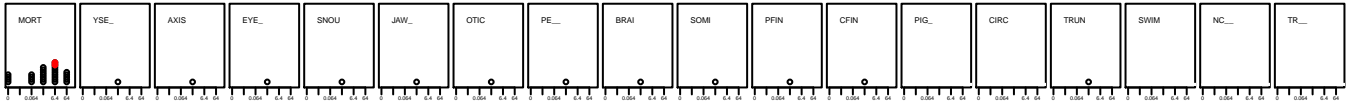

Phenolphthalein

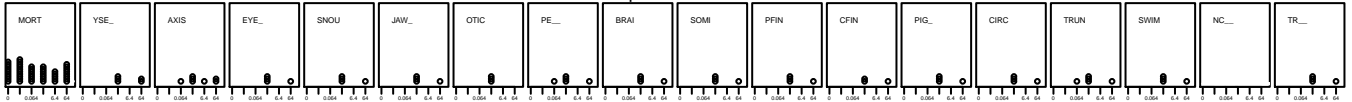

Phenolphthalin

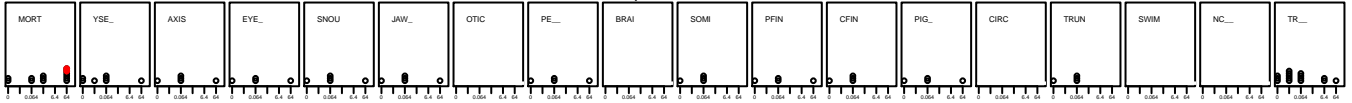

Phenothiazine

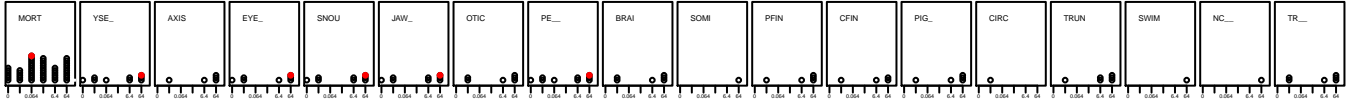

Phenylmercuric acetate

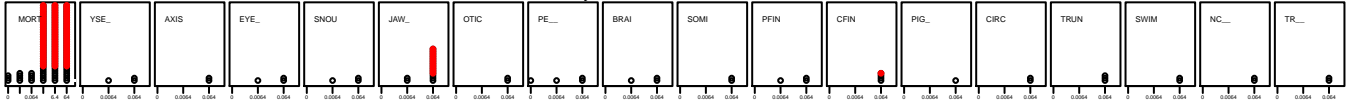

Phorate

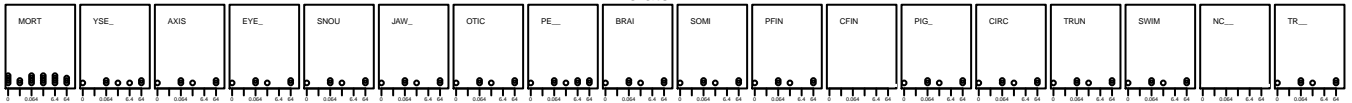

Phosalone

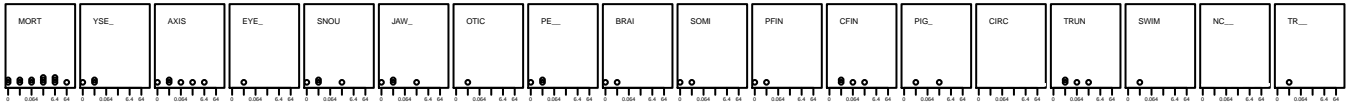

Phosmet

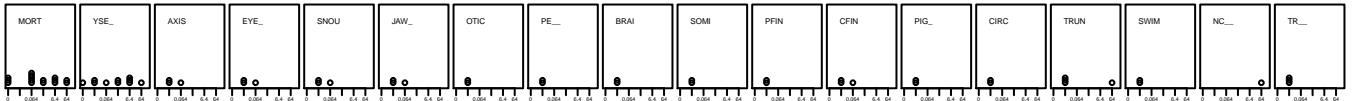

Picloram

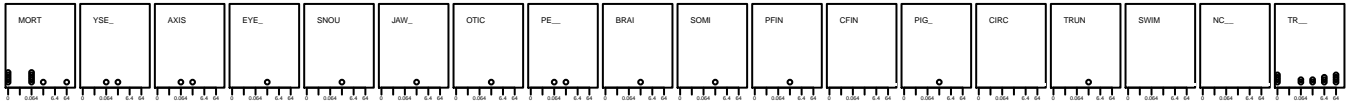

Picoxystrobin

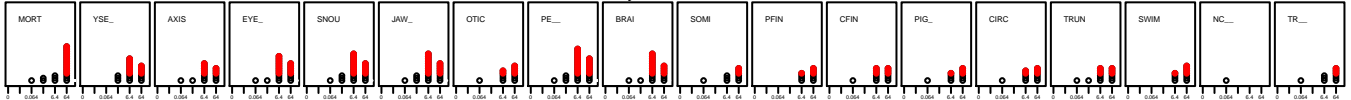

Pioglitazone hydrochloride

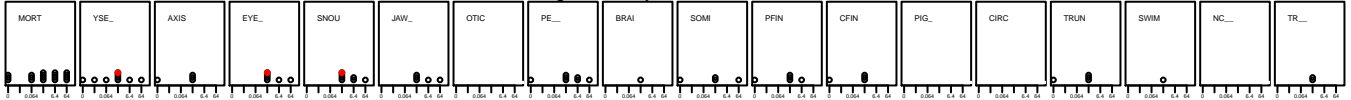

Piperazine

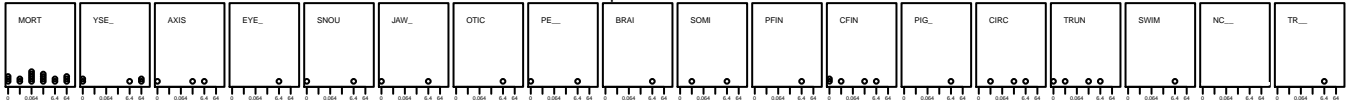

Piperonyl butoxide

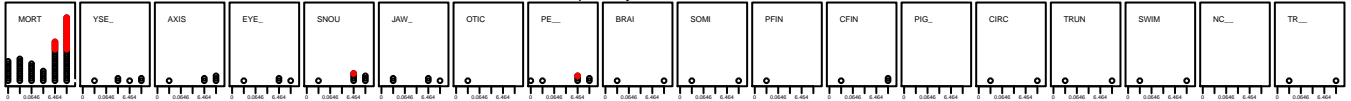

Piragliatin

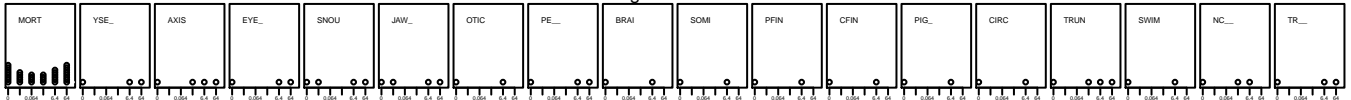

Pirimicarb

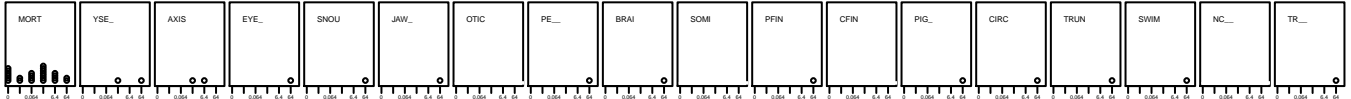

Pirimiphos-methyl

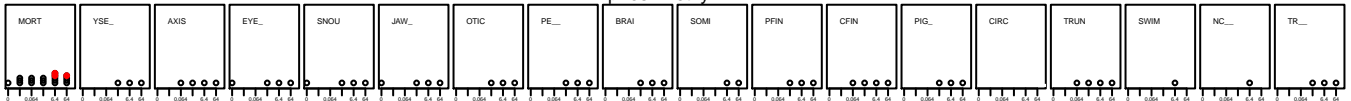

Pirinixic acid

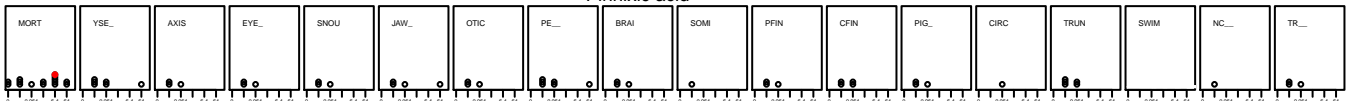

potassium 5-carbamoyl-3-[5'-fluoro-2'-(22333-pentafluoropropoxy)biphenyl-3-yl]-124-triazol-1-ide hydrate

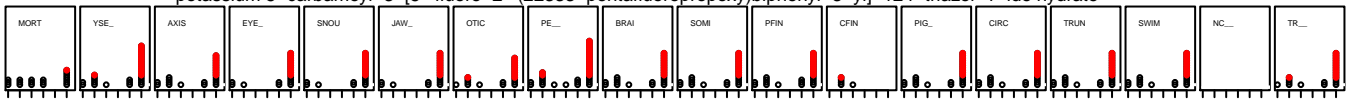

Potassium nonafluoro-1-butanesulfonate

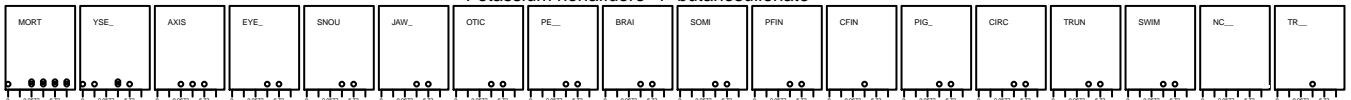

Potassium perfluorohexanesulfonate

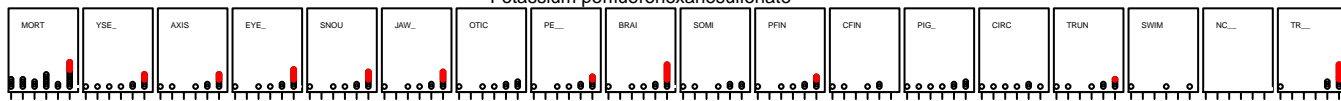

Potassium perfluorooctanesulfonate

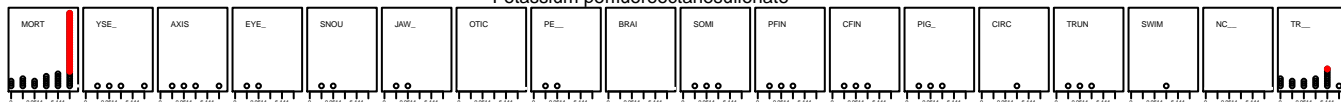

pp'-DDD

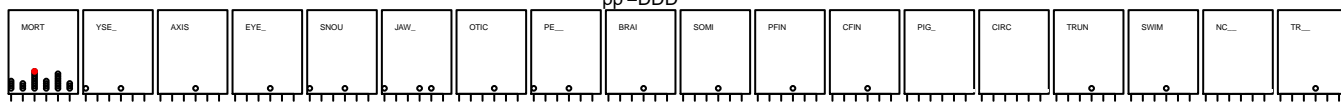

pp'-DDE

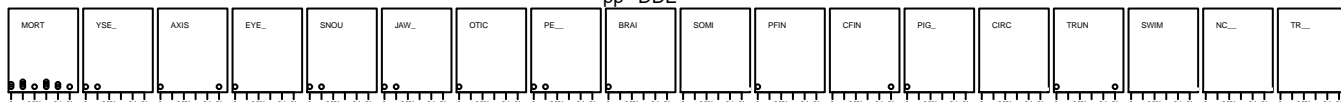

pp'-DDT

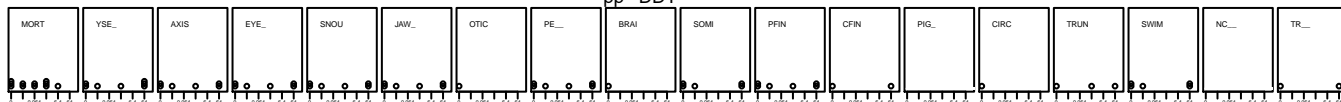

Prallethrin

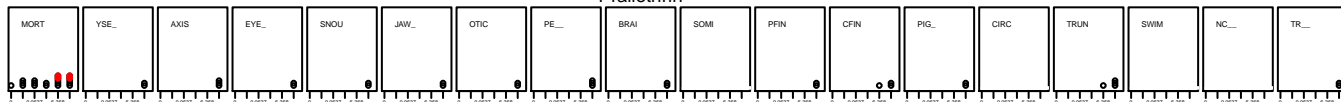

Pravastatin sodium

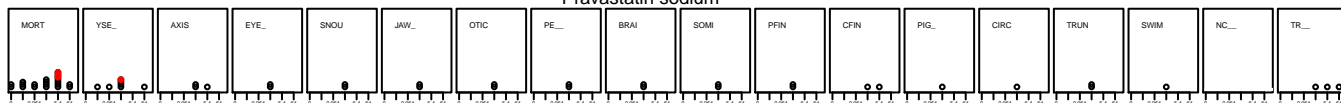

Prednisone

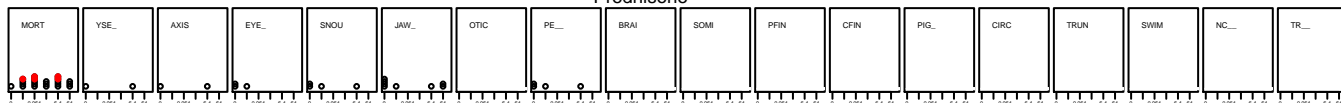

Prochloraz

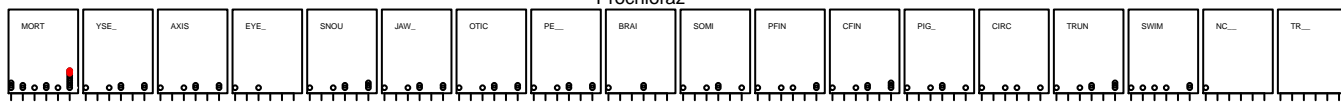

Procymidone

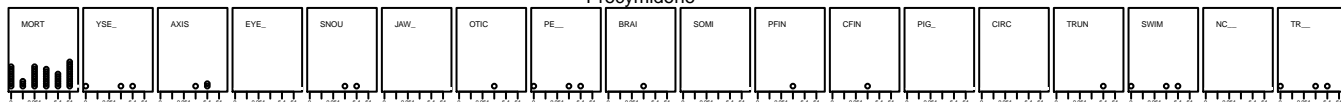



Prodiamine

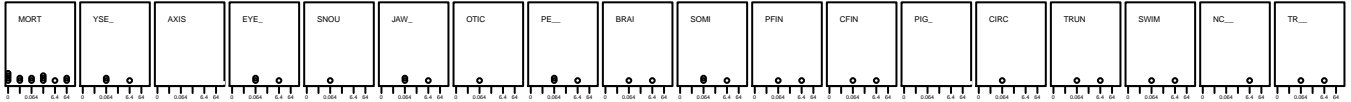

Profenofos

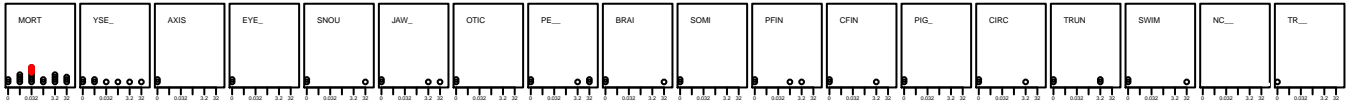

Progesterone

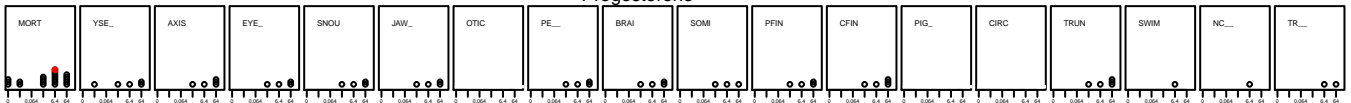

Prometon

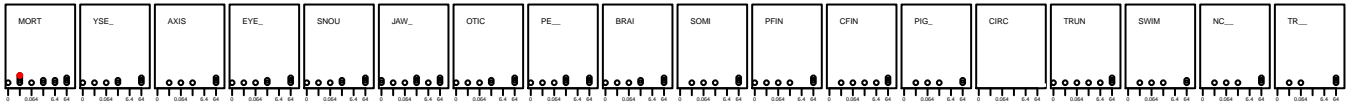

Prometryn

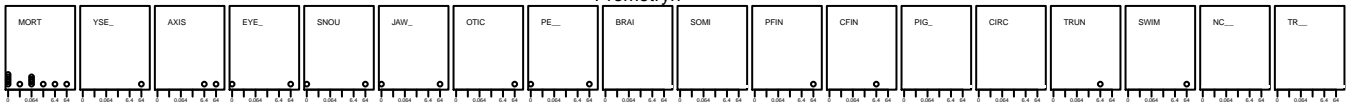

Propamocarb hydrochloride

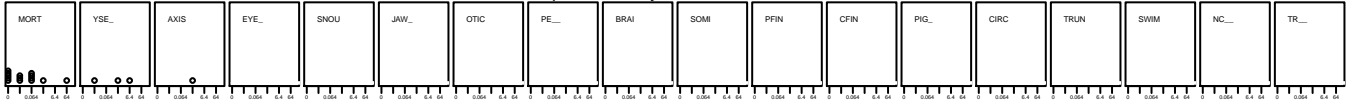

propan-2-yl (2R4S)-4-(acetyl[35-bis(trifluoromethyl)benzyl]amino)-2-ethyl-6-(trifluoromethyl)-34-dihydroquinoline-1(2H)-carboxylate

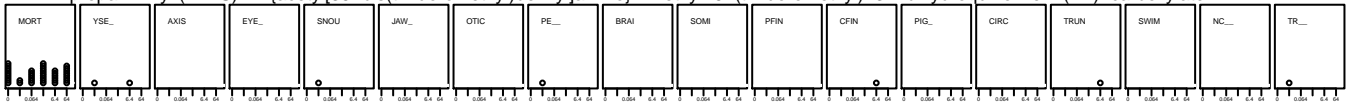

Propanil

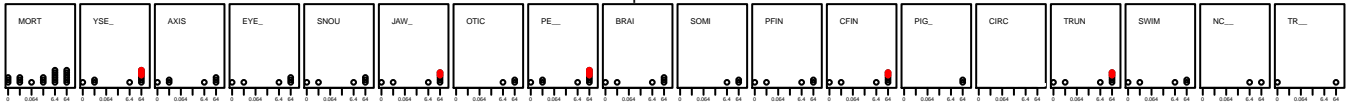

Propranolol (or 2)-(2-methoxymethylethoxy)-

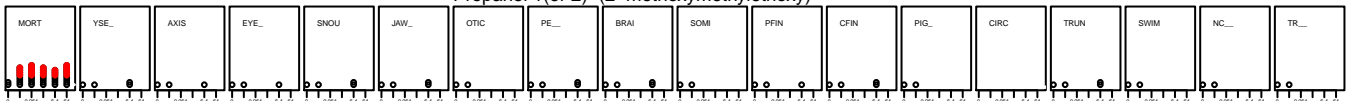

Propargite

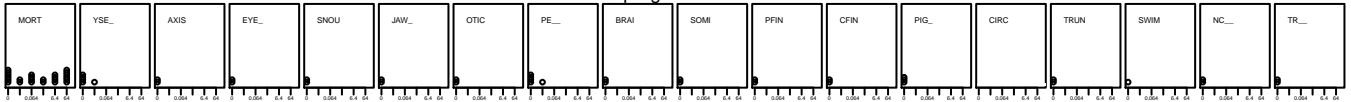

Propazine

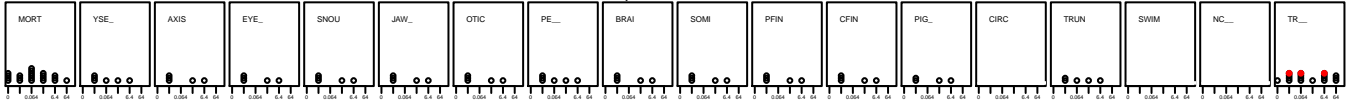

Propetamphos

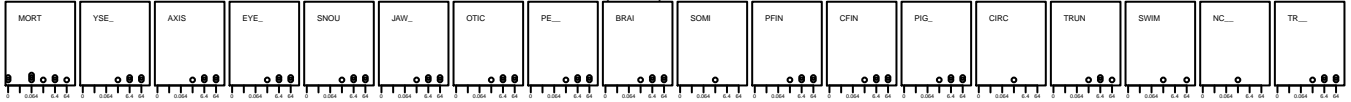

Propiconazole

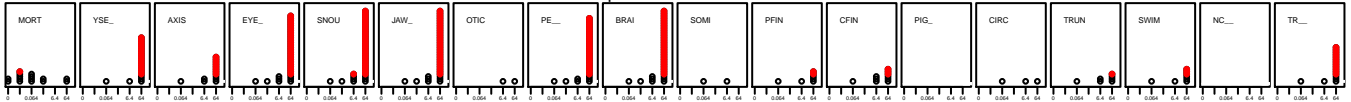

Propoxur

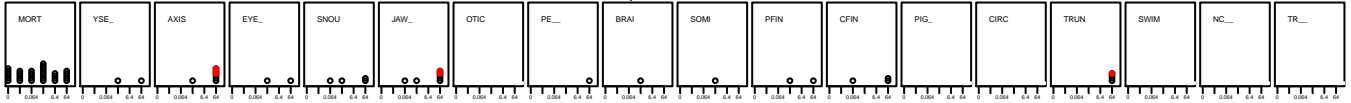

Propoxycarbazone-sodium

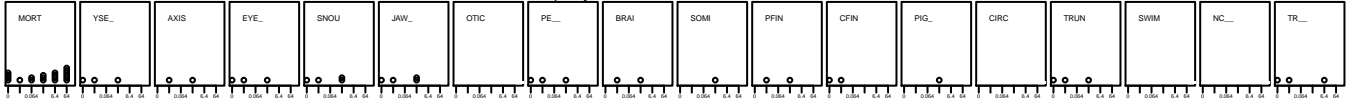

Propyl gallate

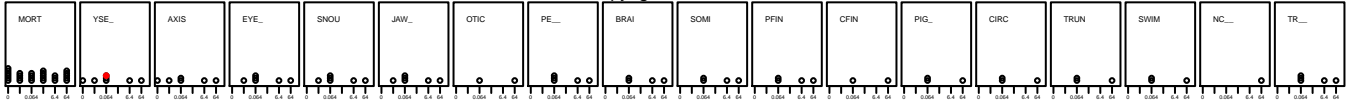

Propylbenzene

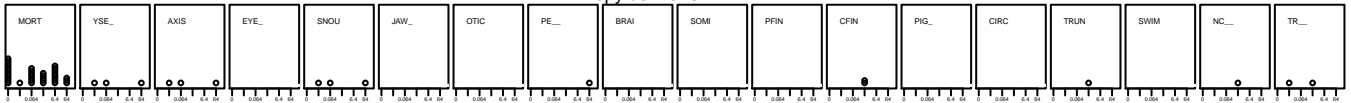

Propylparaben

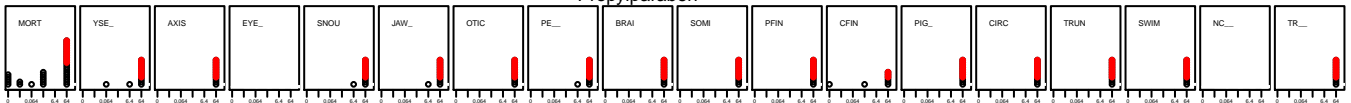

Propyzamide

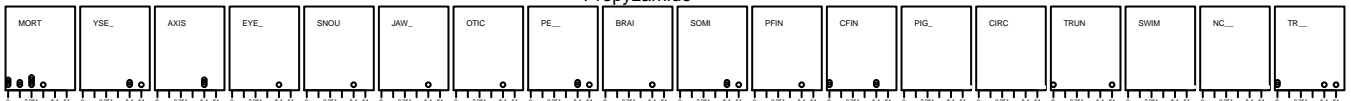

Pymetrozine

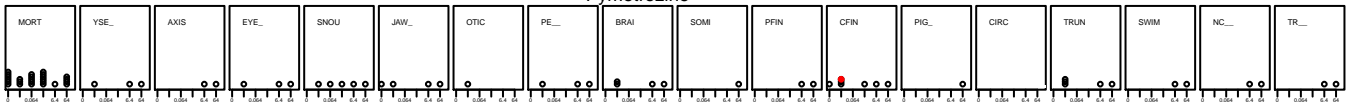

Pyraclostrobin

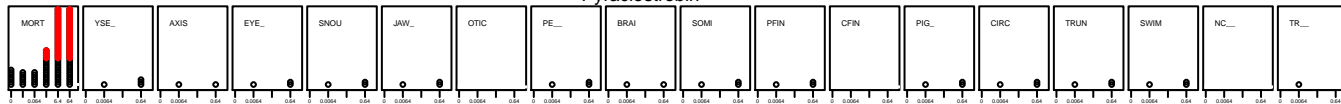

Pyraflufen-ethyl

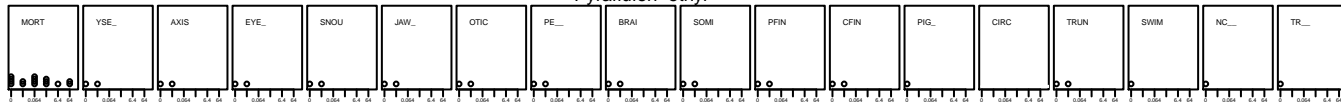

Pyrene

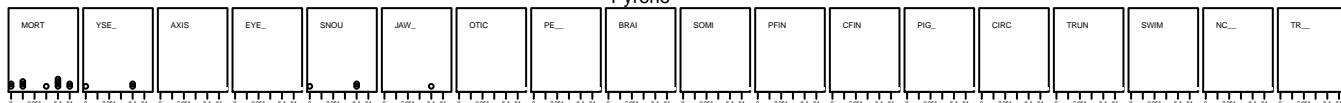

Pyridaben

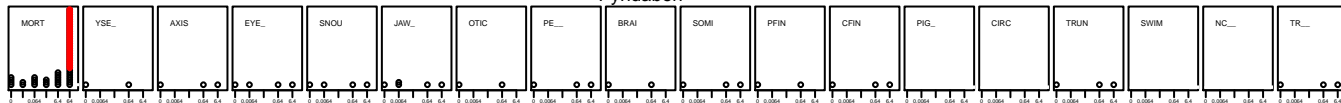

Pyridoxine

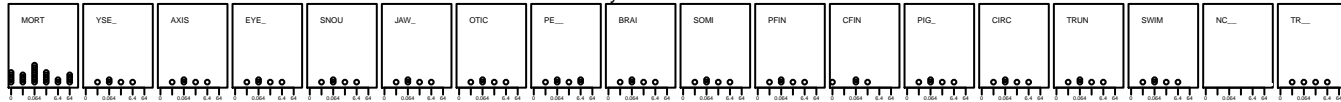

Pyrimethamine

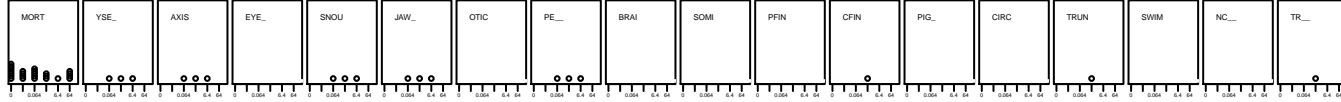

Pyrimethanil

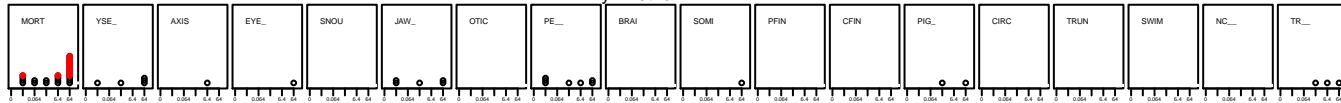

Pyriproxyfen

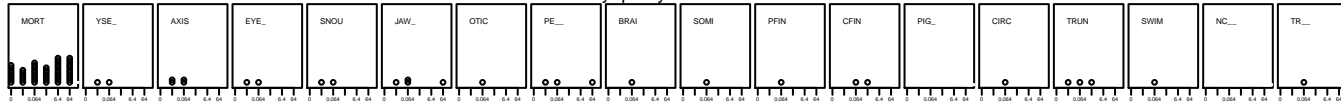

Pyriithiobac-sodium

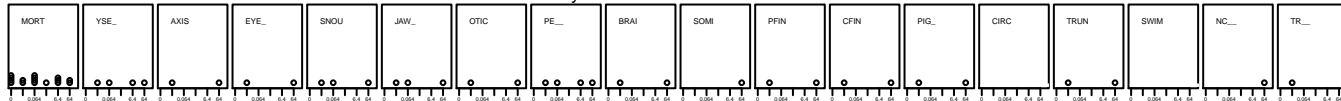

Quercetin

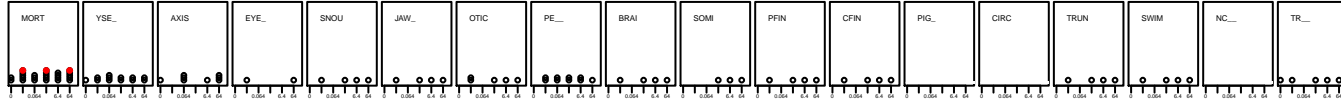

Quinclorac

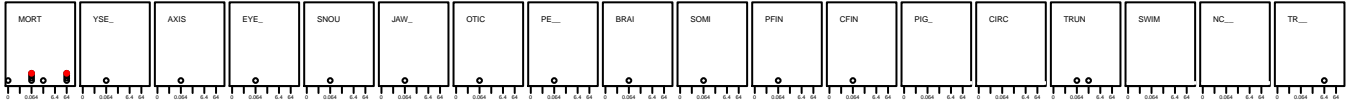

Quinoline

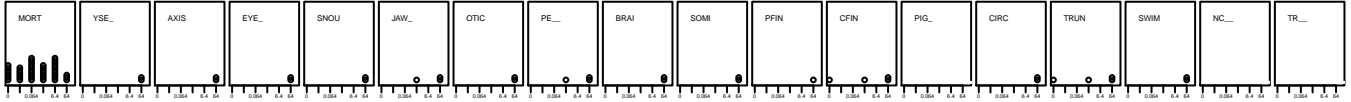

Quinoxifen

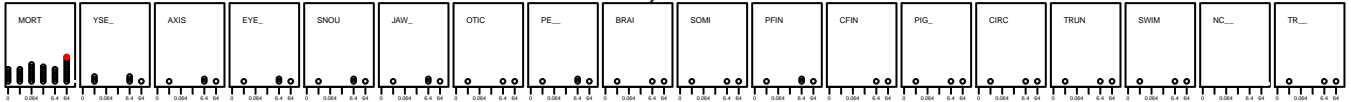

Quizalofop-ethyl

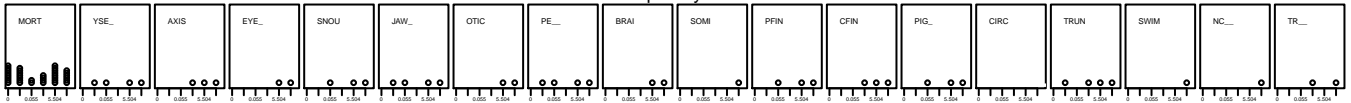

Raloxifene hydrochloride

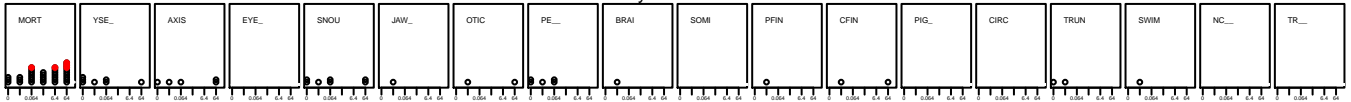

Reserpine

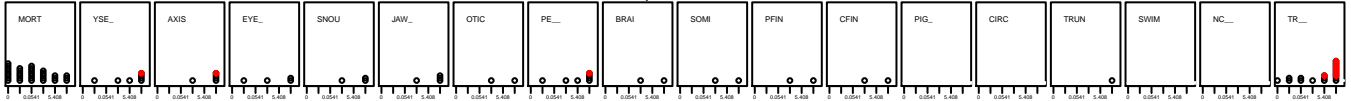

Resmethrin

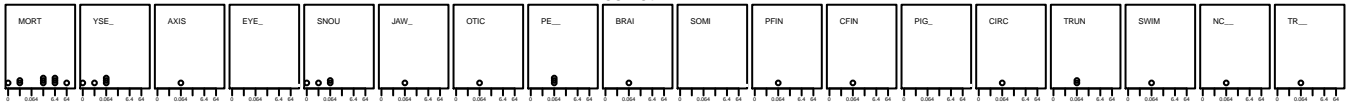

Resorcinol

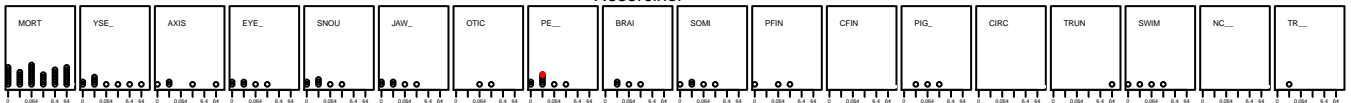

Retinol

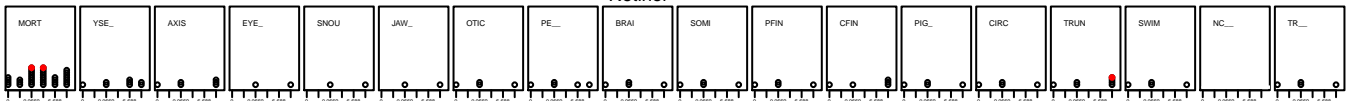

Rifampicin

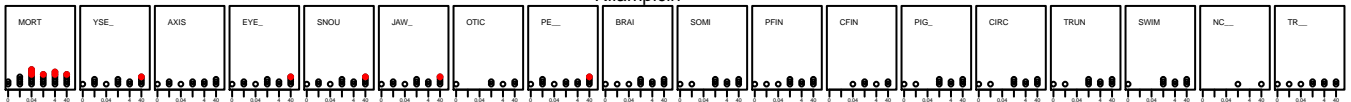



Sodium (2-pyridylthio)-N-oxide

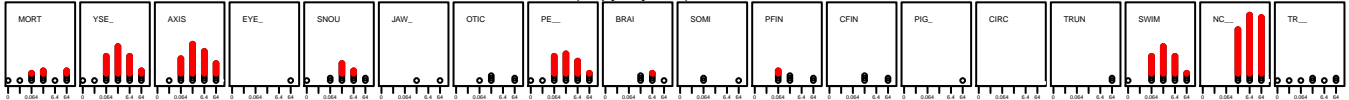

sodium (4-fluoro-2-((1S)-1-phenylpropyl)carbamoyl)phenyl)(quinolin-8-ylsulfonyl)azanide

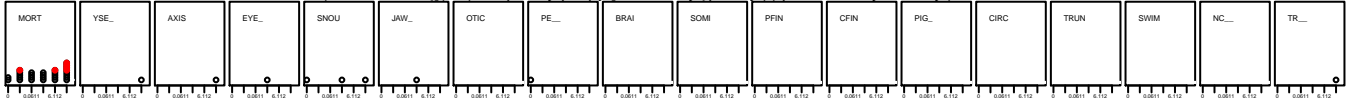

sodium {[26-di(propan-2-yl)phenyl]carbamoyl}{[4-(2-hydroxypropan-2-yl)furan-2-yl]sulfonyl}azanide

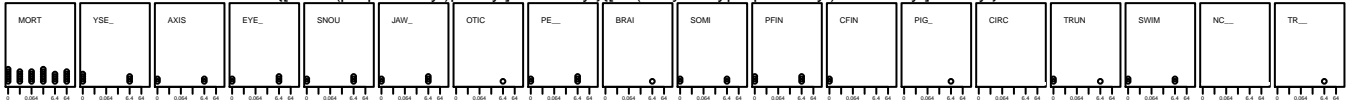

sodium 1-((5-(5-chlorothiophen-2-yl)-12-oxazol-3-yl)methyl)-2-[(1-cyclopropylpiperidin-4-yl)carbamoyl]-1H-benzimidazole-5-carboxylate

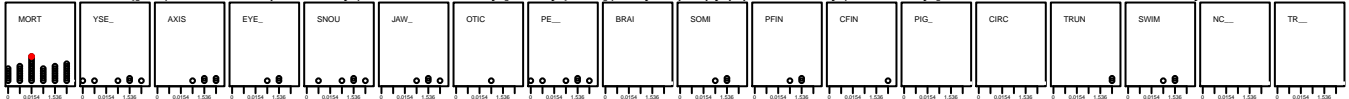

sodium 3-(4-((1-(3-ethoxyphenyl)-2-(4-methylphenyl)-1H-imidazol-4-yl)carbonyl)piperazin-1-yl)naphthalene-1-carboxylate

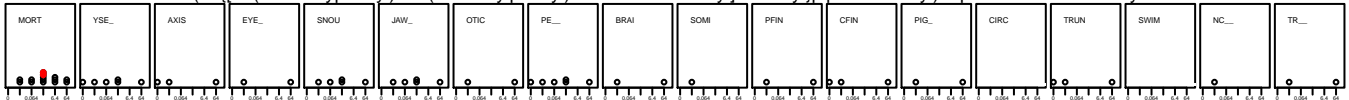

Sodium 4-nitrophenolate

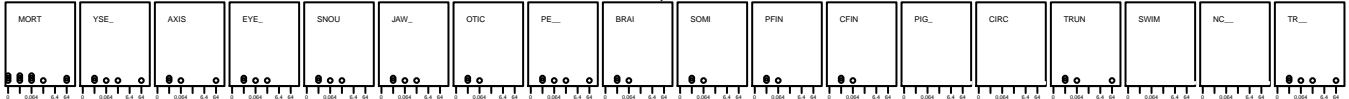

sodium 5-((5-methoxy-3-(propan-2-yloxy)-1-benzothiophen-2-yl)carbonyl)amino)tetrazol-1-ide

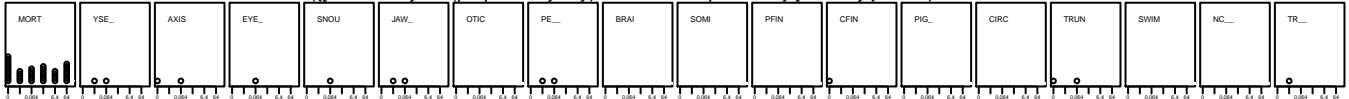

sodium 5-(4'-((2-butyl-3H-imidazo[4,5-b]pyridin-3-yl)methyl)biphenyl-2-yl)tetrazol-1-ide

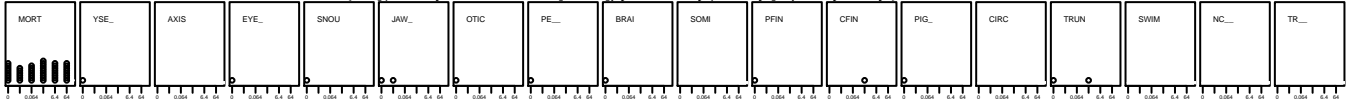

Sodium azide

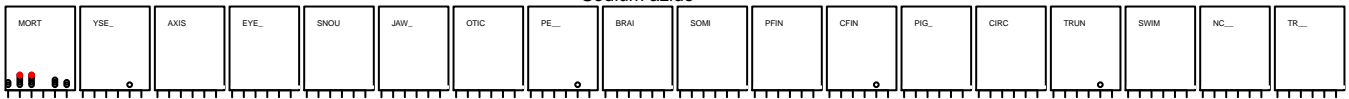

Sodium benzoate

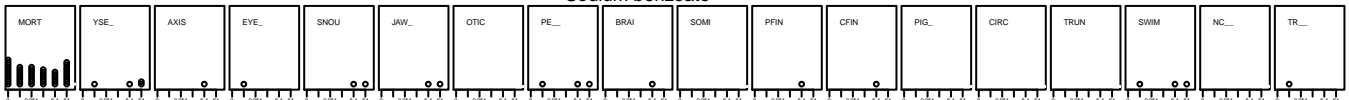

Sodium chlorite

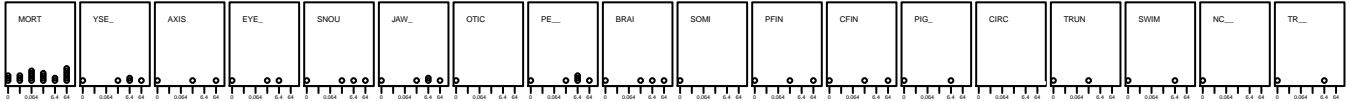

Sodium dehydroacetate

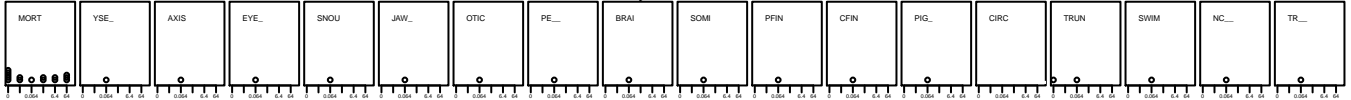

Sodium dimethyldithiocarbamate

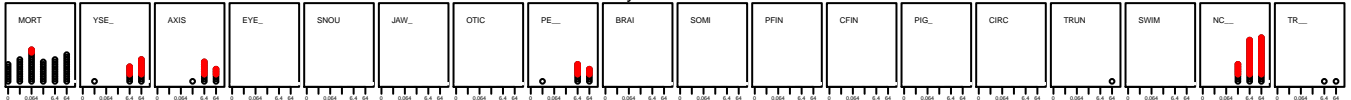

Sodium dodecyl sulfate

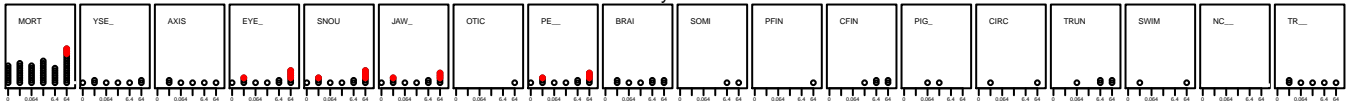

Sodium dodecylbenzenesulfonate

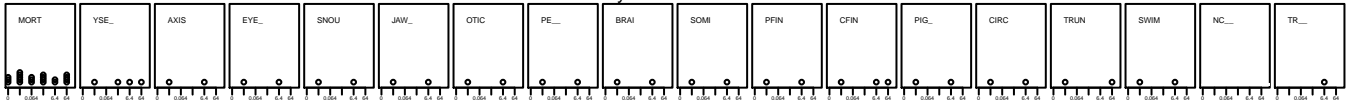

Sodium erythorbate (1:1)

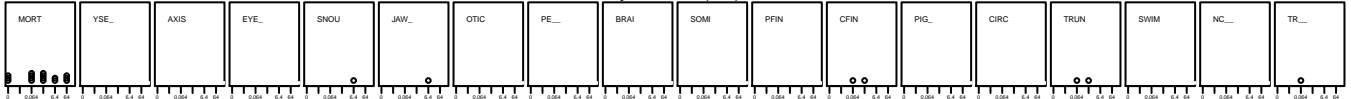

Sodium hexyldecyl sulfate

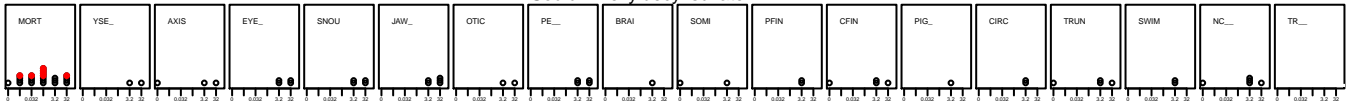

Sodium L-ascorbate

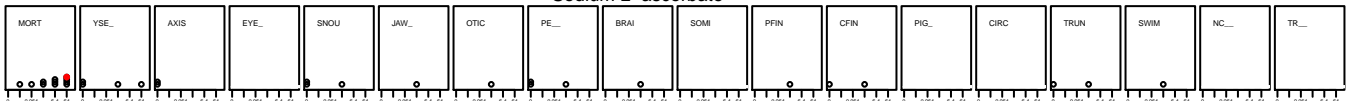

Sodium nitrite

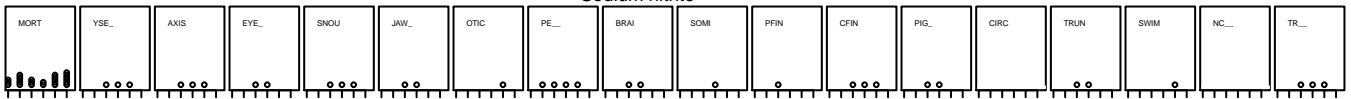

Sodium saccharin hydrate

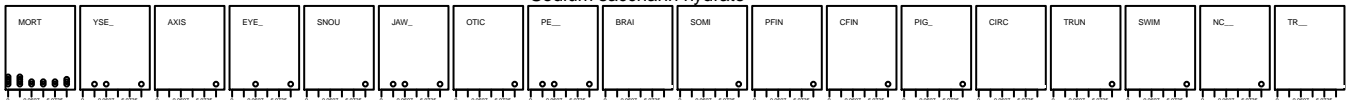

Sodium tetradecyl sulfate

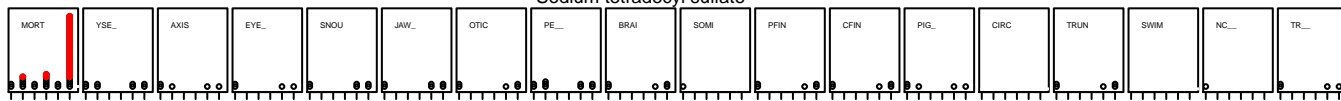

Sodium trichloroacetate

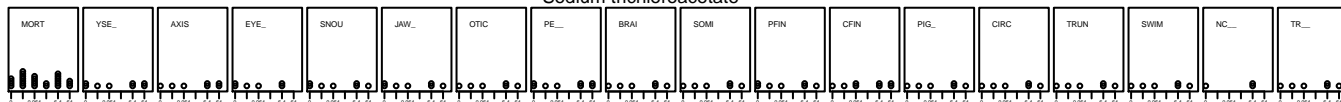

Sodium xylenesulfonate

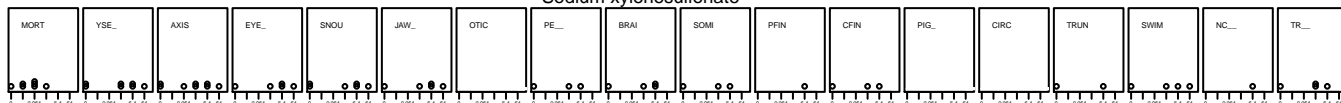

Sorbic acid

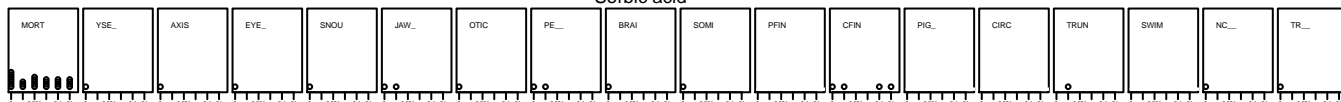

Sorbitan mono-(9Z)-9-octadecenoate

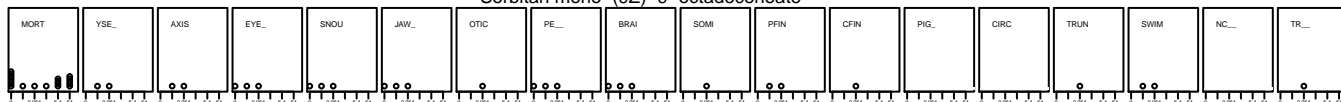

Spiroclófen

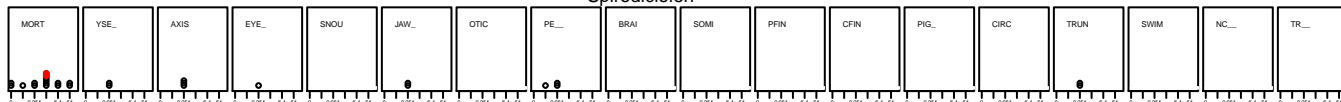

Spirolactone

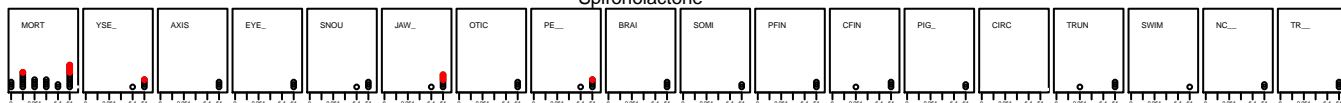

Spiroxamine

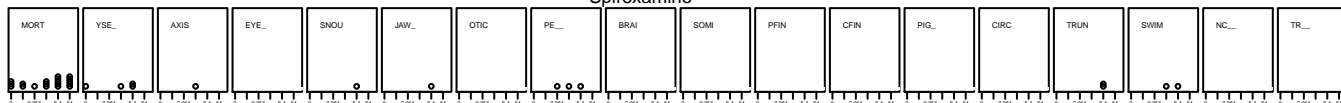

Stavudine

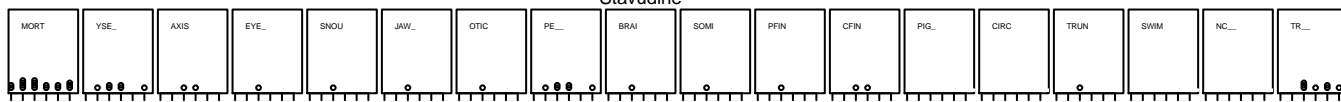

Styrene oxide

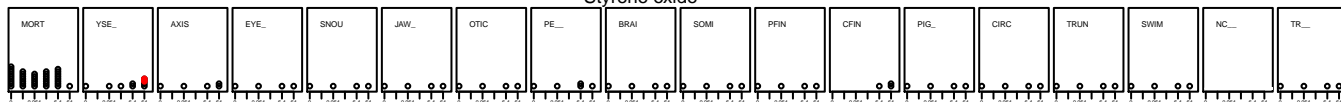





Tebuconazole

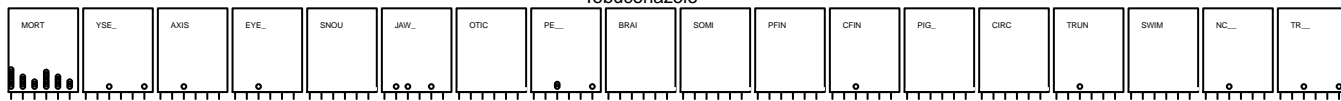

Tebufenozide

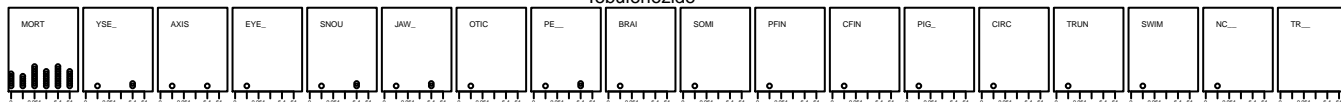

Tebufenpyrad

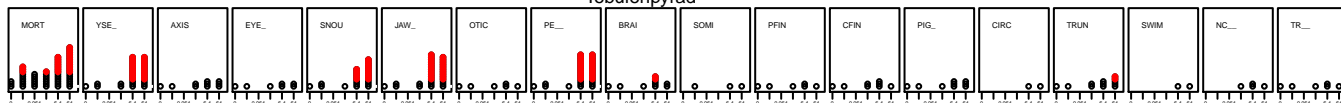

Tebupirimfos

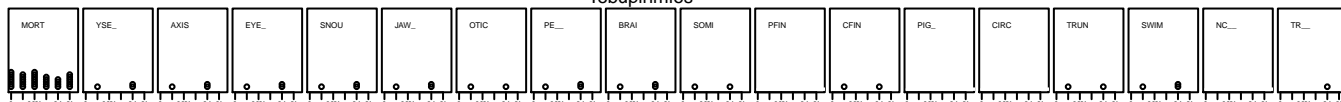

Tebuthiuron

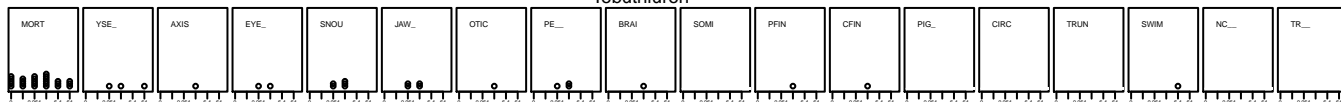

Tefluthrin

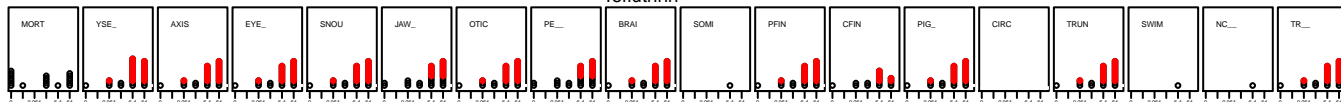

Tepraloxidim

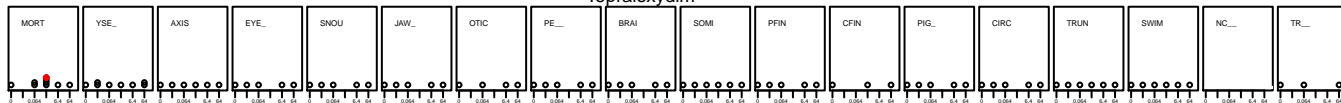

Terbacil

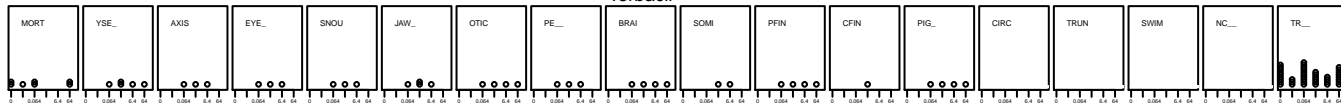

Terbufos

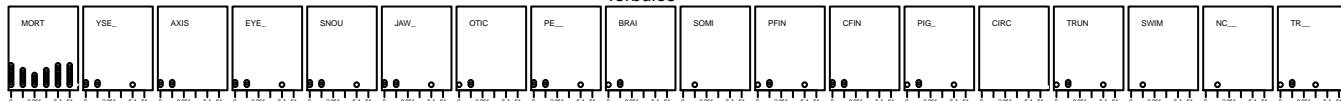

Terbutylazine

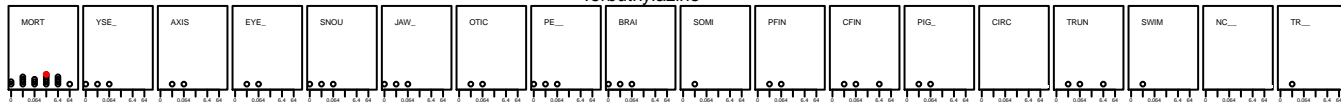

tert-Butyl perbenzoate

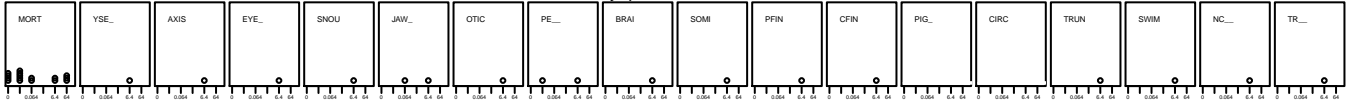

tert-Butylbenzene

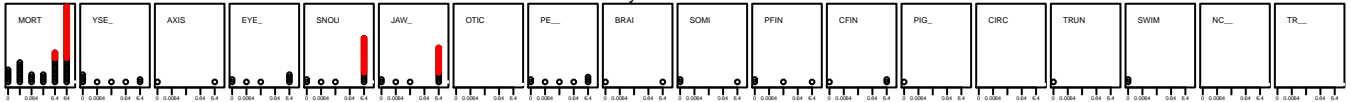

tert-Butylhydroquinone

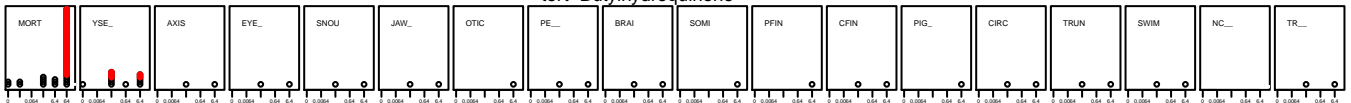

Testosterone propionate

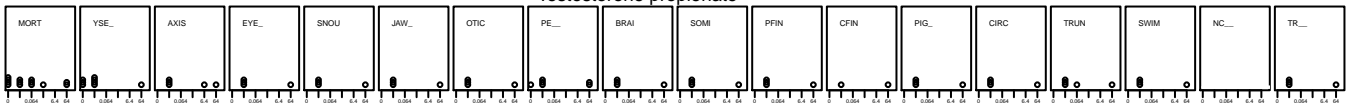

Tetraconazole

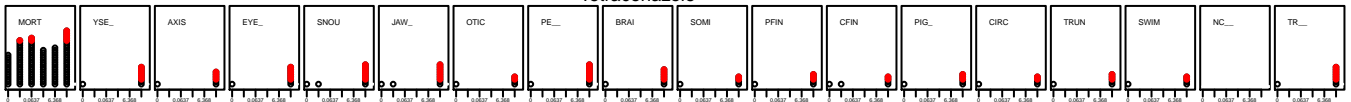

Tetracycline

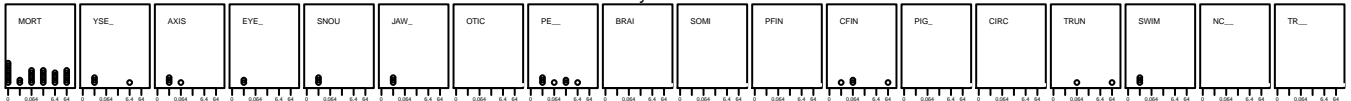

Tetramethrin

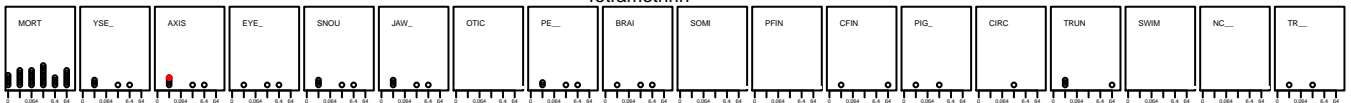

Thalidomide

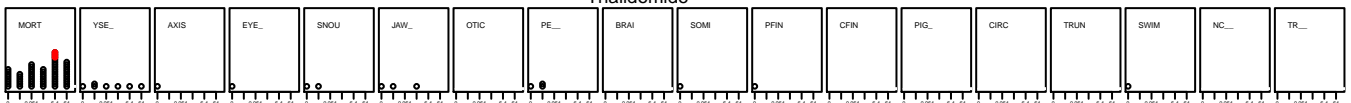

Theobromine

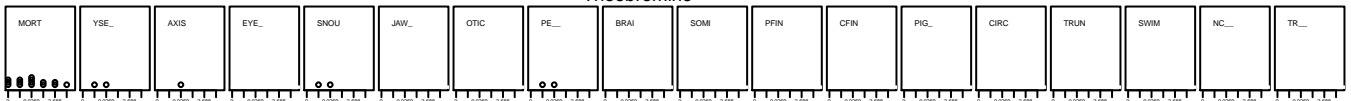

Theophylline

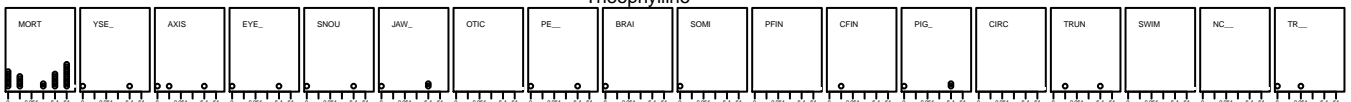

Thiabendazole

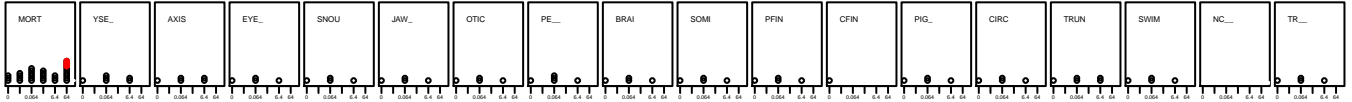

Thiocluprid

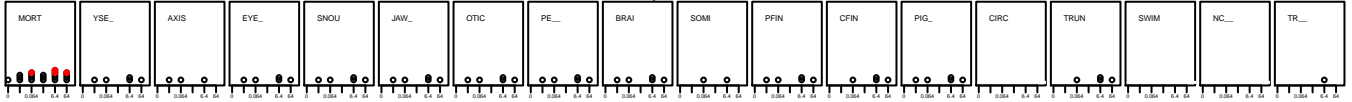

Thiamethoxam

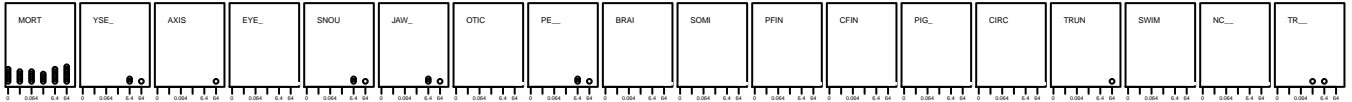

Thiazopyr

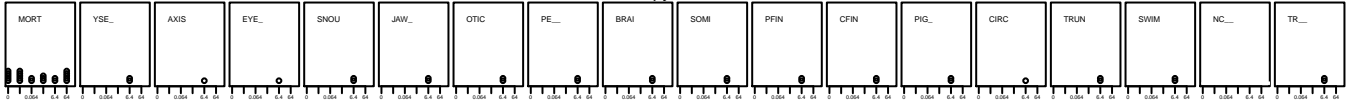

Thidiazuron

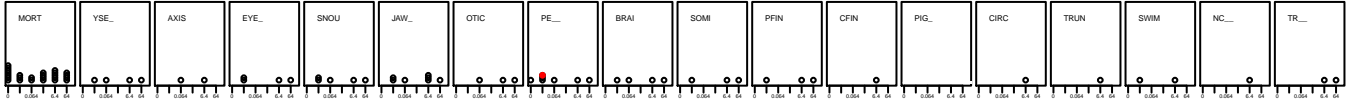

Thiobencarb

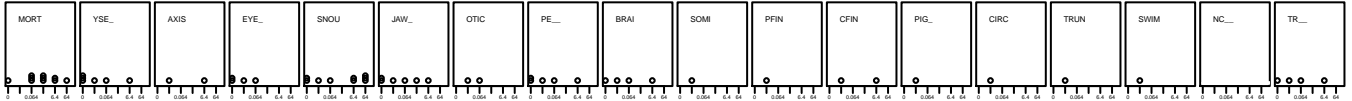

Thiodicarb

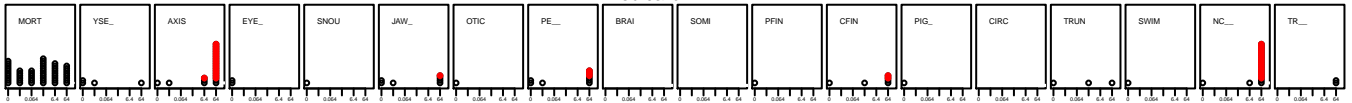

Thiophanate-methyl

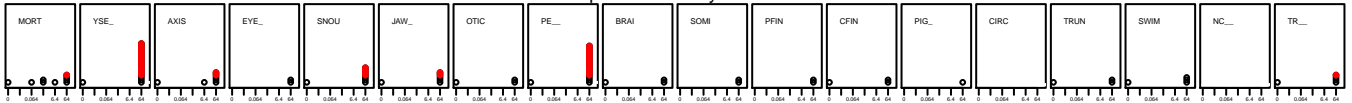

Thiram

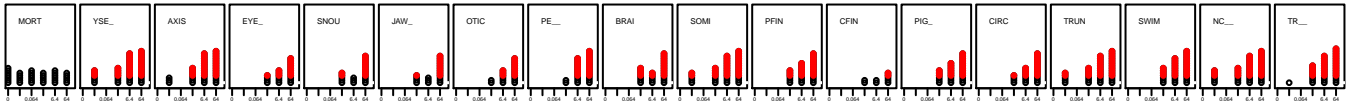

Thymol

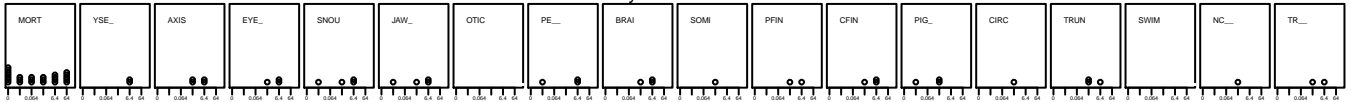

Tiratricol

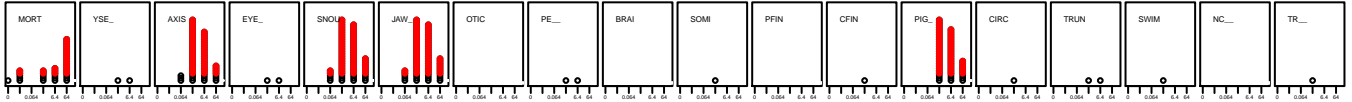

Triadimefon

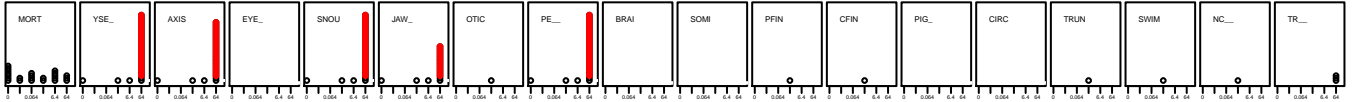

Triadimenol

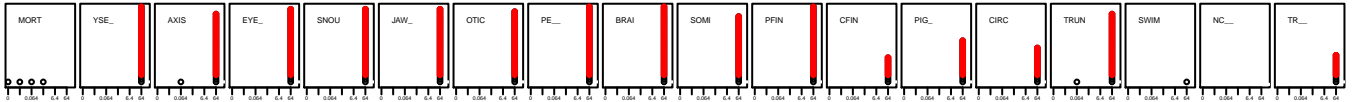

Triamcinolone

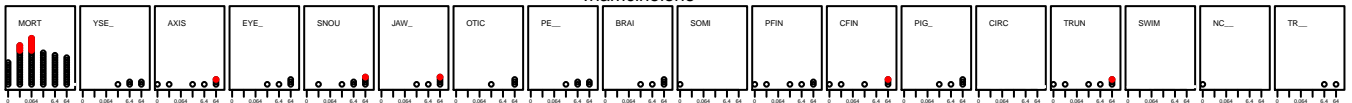

Tribufos

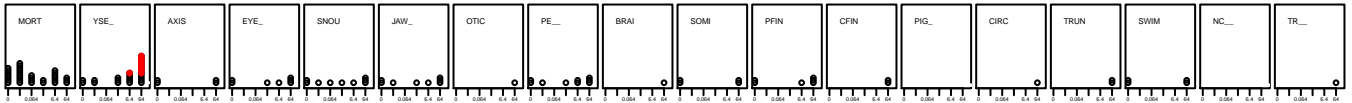

Tributyl phosphate

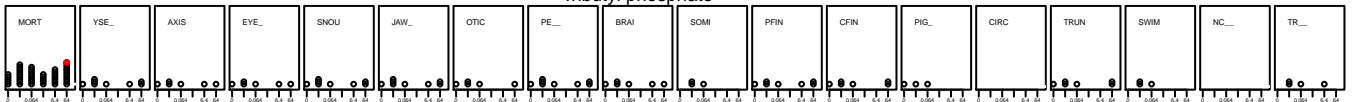

Tributylamine

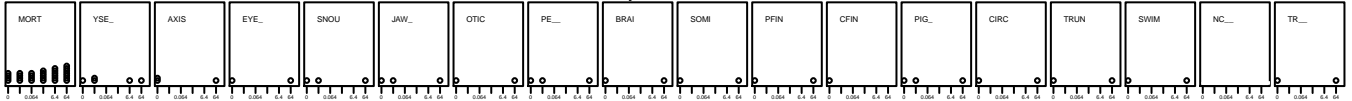

Tributyltin chloride

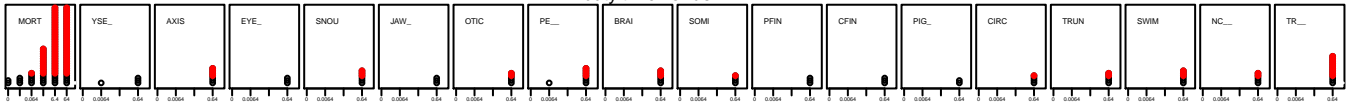

Tributyltin methacrylate

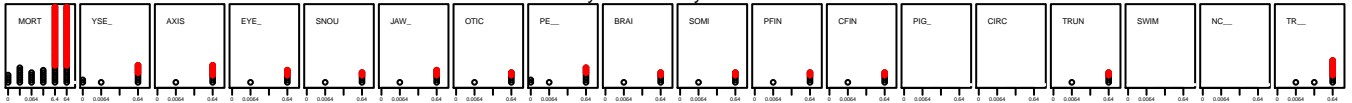

Trichlorfon

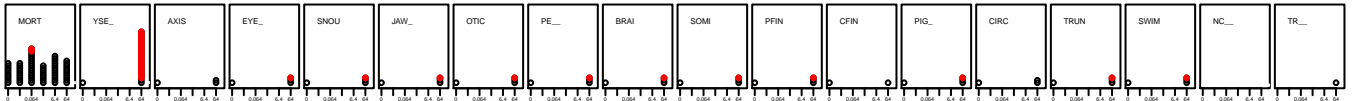

Trichloroacetic acid

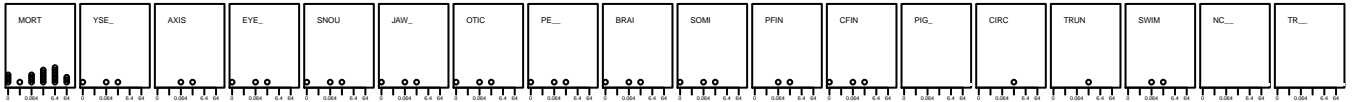

Triclocarban

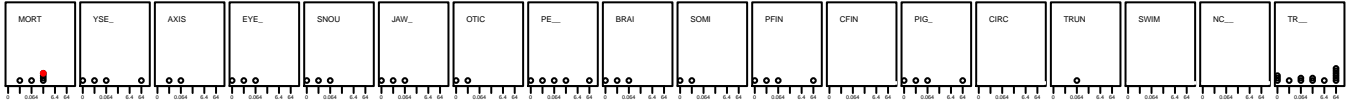

Triclopyr

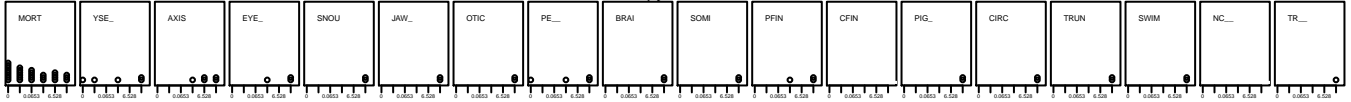

Triclosan

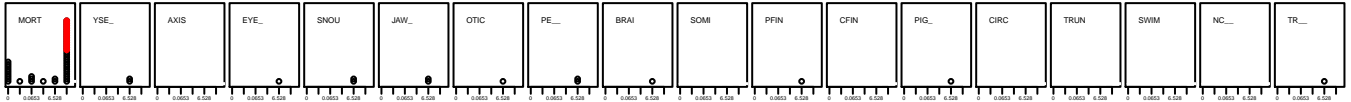

Tridemorph

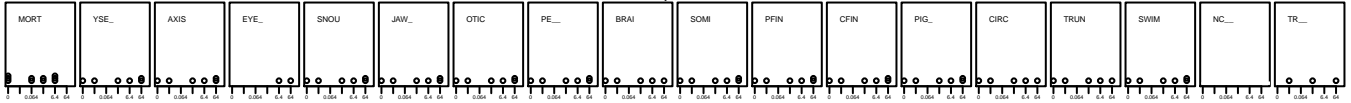

Triethanolamine

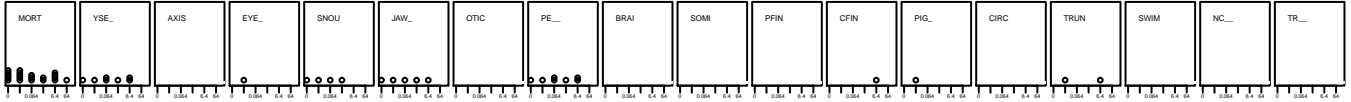

Triethoxyoctylsilane

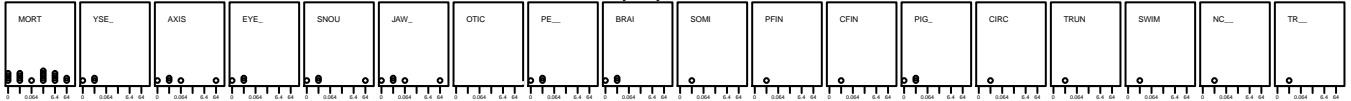

Triethyl citrate

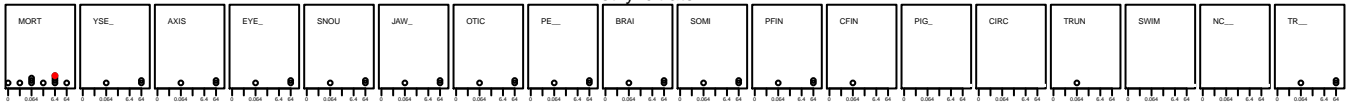

Triethylene glycol

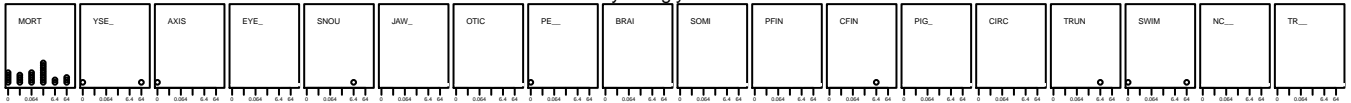

Triethylene glycol bis(2-ethylhexanoate)

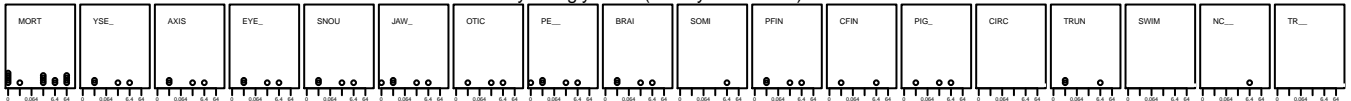

Triethylene glycol diacetate

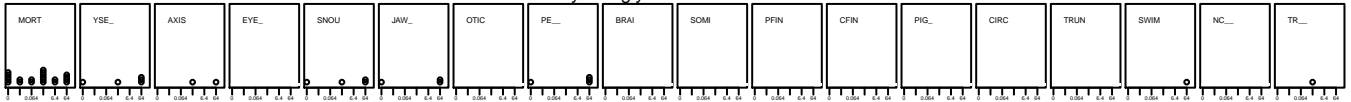

Triethylene glycol dimethyl ether

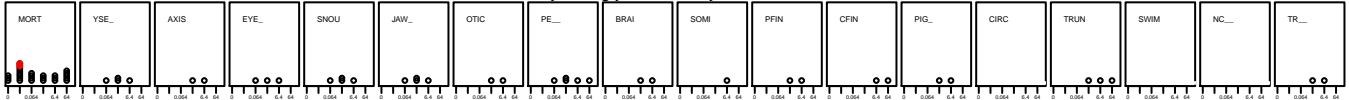

Trifloxystrobin

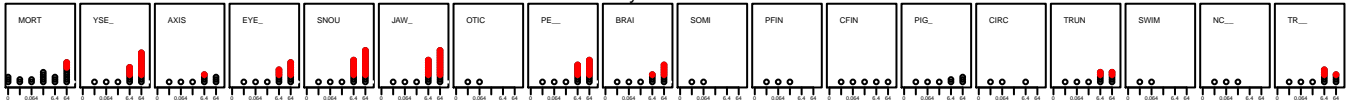

Trifloxysulfuron-sodium

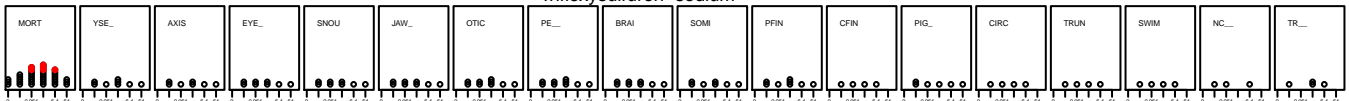

Triflumizole

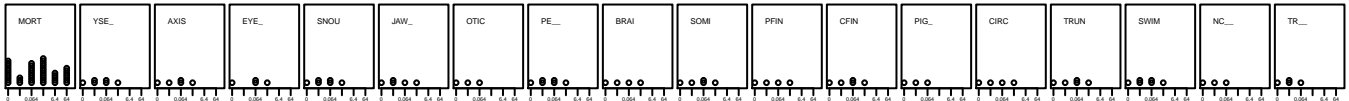

Trifluralin

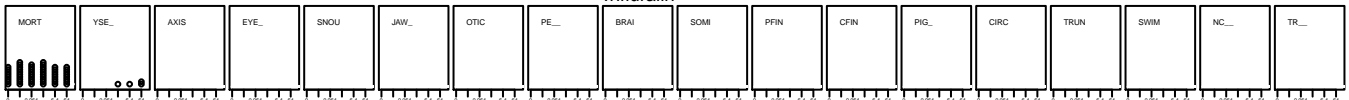

Triglycidyl isocyanurate

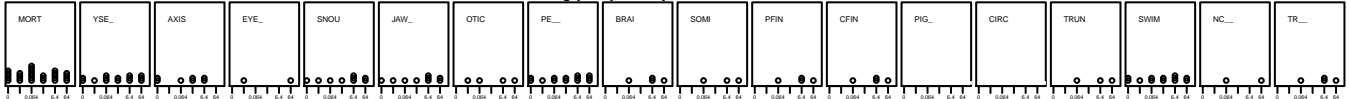

Triisononyl trimellitate

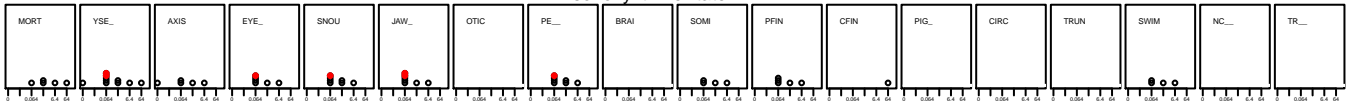

Triooctyl trimellitate

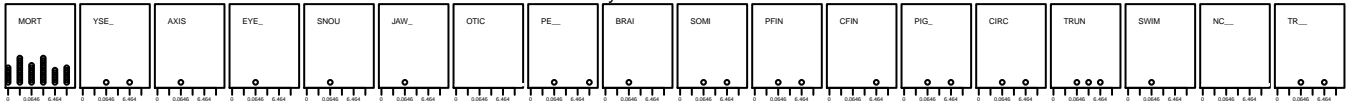

Triphenyl phosphite

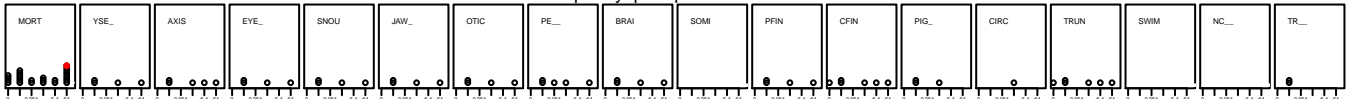

Triphenyl phosphite

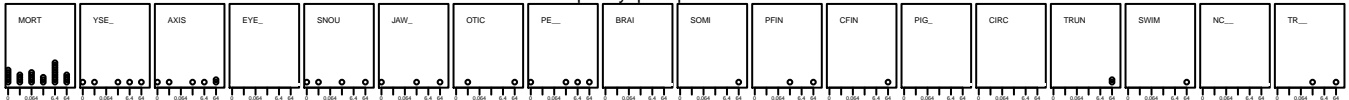



Triphenyltin hydroxide

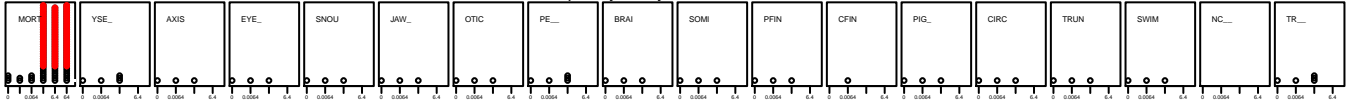

Tripropylene glycol monomethyl ether

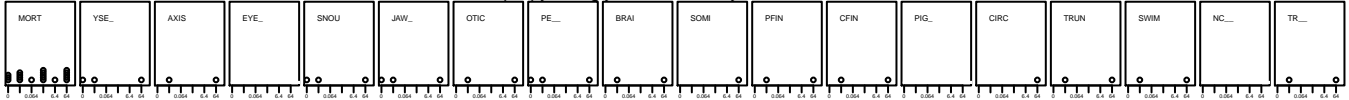

Tris(13-dichloro-2-propyl)phosphate

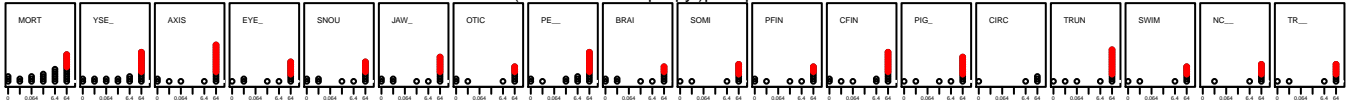

Tris(2-chloroethyl) phosphate

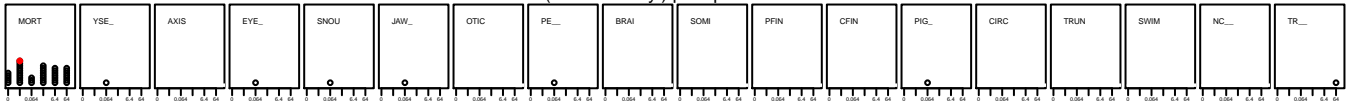

Tris(2-ethylhexyl) phosphate

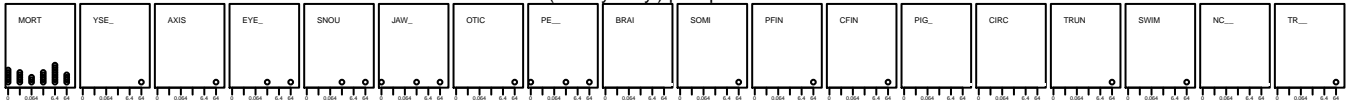

Tris(2-ethylhexyl) trimellitate

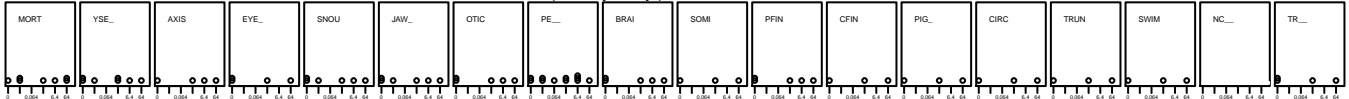

Triticonazole

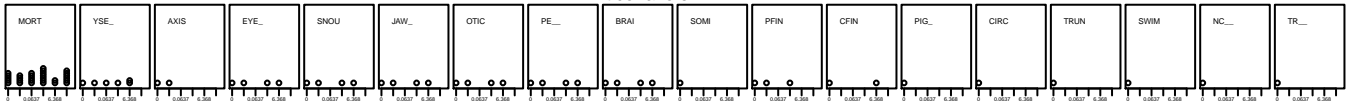

Troglitazone

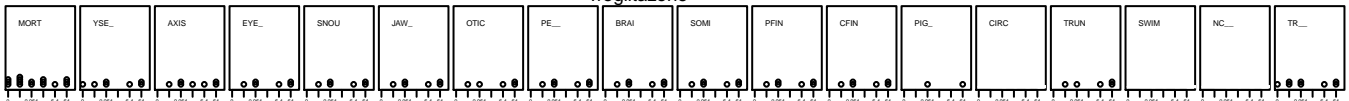

Undecane

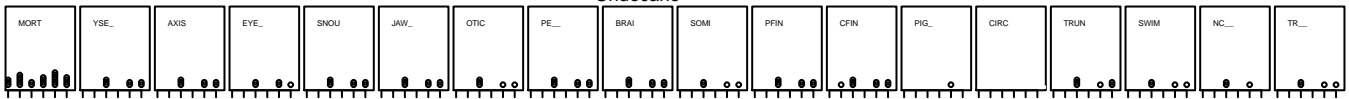

Urea

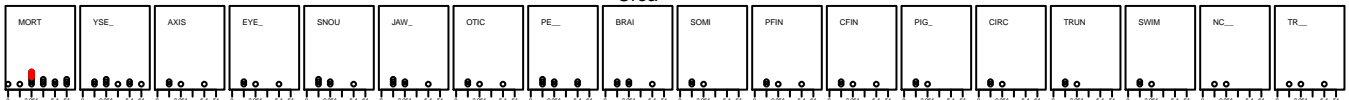

Urethane

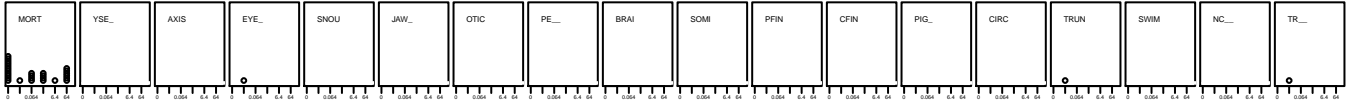

Valproic acid

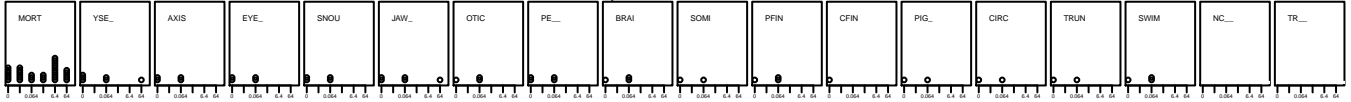

Vernolate

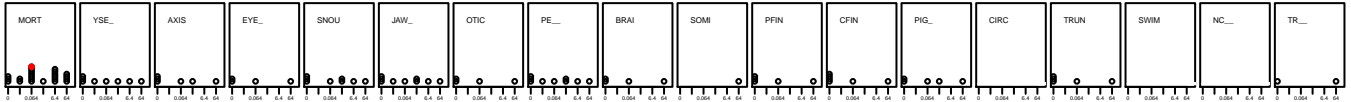

Vinclozolin

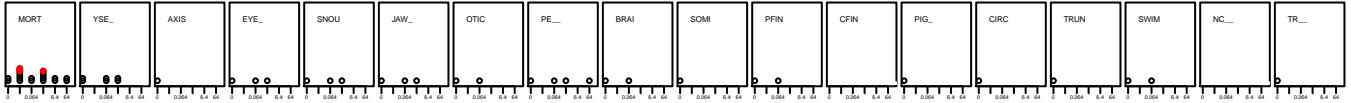

Volinanserin

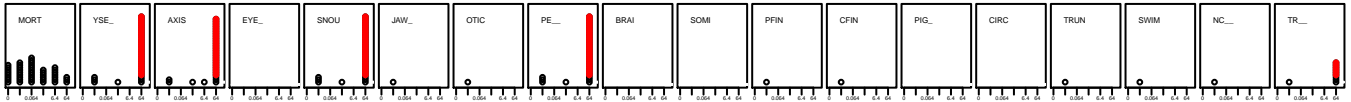

Warfarin

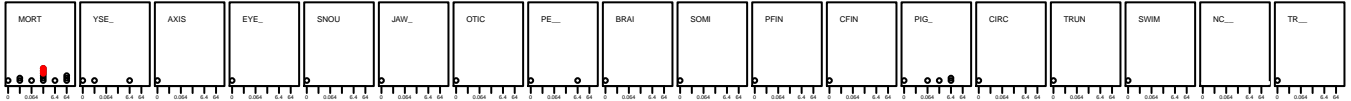

Zamifenacin

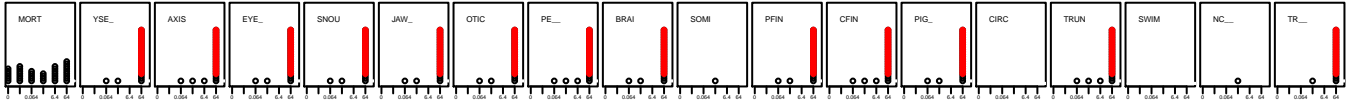

Zenarestat

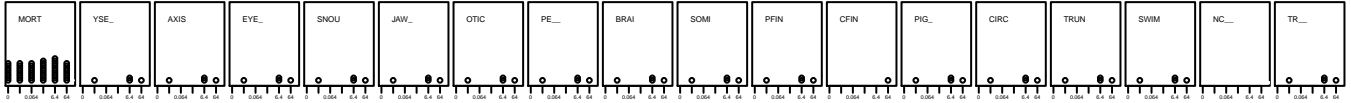

Ziram

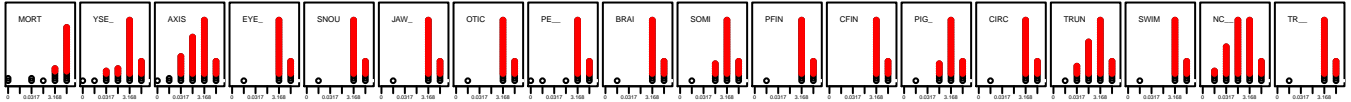

Zoxamide

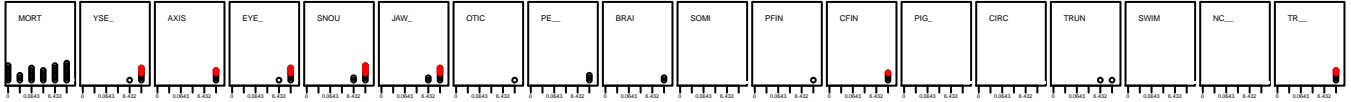

Supplement: supp_kft235_toxsci_13_0620_File009.pdf [file supp_kft235_toxsci_13_0620_File009.pdf]
